# Supplementary material for: Palladium-catalysed site-selective arene ortho C–H fluoroalkoxylation of 4-aryl-pyrrolo[2,3-d]pyrimidines
Source: Royal Society of Chemistry journal article supplement (doi:10.1039/d3ob00084b), 2023-01-01

## Supporting Information

### Palladium-Catalysed Site-Selective Arene *Ortho* C-H Fluoroalkoxylation of 4-Aryl-pyrrolo[2,3-*d*]pyrimidines

Yunfeng Jiang<sup>a</sup>, Chenhong Pan<sup>a</sup>, Ting Tang<sup>\*b</sup>, Mingrui Liu<sup>a</sup>, and Xingxian Zhang<sup>\*a</sup>

<sup>a</sup>College of Pharmaceutical Science, Zhejiang University of Technology, Hangzhou 310014, P. R.

China

<sup>b</sup>School of Public Health, Hangzhou Normal University, Hangzhou 311121, P. R. China

#### Table of Contents

|                                                                                       |     |
|---------------------------------------------------------------------------------------|-----|
| 1. General Information.....                                                           | S2  |
| 2. Condition optimization.....                                                        | S3  |
| 3. General Procedures .....                                                           | S4  |
| 4. Mechanism studies.....                                                             | S5  |
| 5. Characterization of Compounds .....                                                | S7  |
| 6. <sup>1</sup> H, <sup>13</sup> C, <sup>19</sup> F NMR Spectra for<br>Compounds..... | S32 |

## 1. General Information

All reagents were purchased from commercial suppliers and used without further purification. The starting material 4-Chloro-7*H*-pyrrolo[2,3-*d*]pyrimidine is commercially available. A series of substrates **1** were prepared according to the literature procedure.<sup>1-2</sup> NMR spectra were obtained on a Bruker ADNANCE III 400 or 500 and 377 MHz (<sup>19</sup>F NMR) with TMS as the internal standard using CDCl<sub>3</sub> as the solvent. Chemical shifts are given in parts per million (ppm) and coupling constants in Hz. In the <sup>1</sup>H and <sup>13</sup>C spectra, chemical shifts are reported in ppm relative to CDCl<sub>3</sub> with 7.28 for <sup>1</sup>H, 77.04 for <sup>13</sup>C and -73.50 for <sup>19</sup>F. The following abbreviations were used for <sup>1</sup>H NMR to indicate the signal multiplicity: s (singlet), d (doublet), t (triplet), m (multiplet). Melting points were measured on a BUCHI B-540 and uncorrected. Analytical thin-layer chromatography was carried out using commercial aluminum sheets precoated (0.2 mm layer thickness) with silica gel GF254, and visualization was effected with short wavelength UV light (254 nm). Product purification by flash chromatography was performed using 200-400 mesh silica gel. HRMS (ESI) was recorded using Agilent 6520 accurate-Mass Q-TOF LC/MS system.

### Reference:

1. M. Klečka, R. Pohl, B. Klepetářov, M. Hocek, *Org. Biomol. Chem.*, 2009, **7** 866-868.
2. J. Zhou, Z. Mao, H. Pan, X. Zhang, *Org. Chem. Front.*, 2020, **7**, 324-328.

## 2. Condition optimization

Table S1. Condition optimization<sup>a</sup>

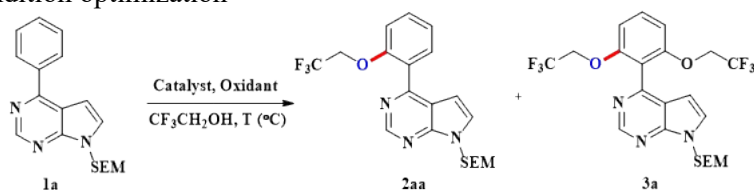

| entry           | Catalyst                                  | oxidant                             | T ( $^\circ\text{C}$ ) | Time (h) | Yield (%) <sup>b</sup> |       |
|-----------------|-------------------------------------------|-------------------------------------|------------------------|----------|------------------------|-------|
|                 |                                           |                                     |                        |          | 2aa                    | 3a    |
| 1               | $\text{Pd}(\text{TFA})_2(20)$             | $\text{PhI}(\text{OAc})_2(2)$       | 95                     | 2        | 35                     | 44    |
| 2               | /                                         | $\text{PhI}(\text{OAc})_2(2)$       | 95                     | 12       | NR <sup>c</sup>        | -     |
| 3               | $\text{Pd}(\text{TFA})_2(20)$             | /                                   | 95                     | 12       | NR                     | -     |
| 4               | $\text{Pd}(\text{OAc})_2(20)$             | $\text{PhI}(\text{OAc})_2(2)$       | 95                     | 5        | 27                     | 43    |
| 5               | $\text{Pd}(\text{MeCN})_2\text{Cl}_2(20)$ | $\text{PhI}(\text{OAc})_2(2)$       | 95                     | 12       | 20                     | -     |
| 6               | $\text{PdCl}_2(20)$                       | $\text{PhI}(\text{OAc})_2(2)$       | 95                     | 12       | NR                     | -     |
| 7               | $\text{Pd}(\text{PPh}_3)\text{Cl}_2(20)$  | $\text{PhI}(\text{OAc})_2(2)$       | 95                     | 12       | NR                     | -     |
| 8               | $\text{Pd}_2(\text{dba})_3(20)$           | $\text{PhI}(\text{OAc})_2(2)$       | 95                     | 12       | NR                     | -     |
| 9               | $\text{Pd}(\text{PPh}_3)_4(20)$           | $\text{PhI}(\text{OAc})_2(2)$       | 95                     | 12       | NR                     | -     |
| 10              | $\text{Pd}(\text{TFA})_2(20)$             | $\text{K}_2\text{S}_2\text{O}_8(2)$ | 95                     | 24       | NR                     | -     |
| 11              | $\text{Pd}(\text{TFA})_2(20)$             | $\text{Cu}(\text{OAc})_2(2)$        | 95                     | 24       | NR                     | -     |
| 12              | $\text{Pd}(\text{TFA})_2(20)$             | TBHP(2)                             | 95                     | 24       | NR                     | -     |
| 13              | $\text{Pd}(\text{TFA})_2(20)$             | $\text{O}_2(1 \text{ atm})$         | 95                     | 24       | NR                     | -     |
| 14              | $\text{Pd}(\text{TFA})_2(20)$             | $\text{Ag}_2\text{CO}_3(2)$         | 95                     | 24       | NR                     | -     |
| 15              | $\text{Pd}(\text{TFA})_2(20)$             | $\text{AgSbF}_6(2)$                 | 95                     | 24       | NR                     | -     |
| 16              | $\text{Pd}(\text{TFA})_2(20)$             | $\text{AgNTf}(2)$                   | 95                     | 24       | NR                     | -     |
| 17              | $\text{Pd}(\text{TFA})_2(20)$             | $\text{AgOTf}(2)$                   | 95                     | 24       | NR                     | -     |
| 18 <sup>d</sup> | $\text{Pd}(\text{TFA})_2(20)$             | $\text{PhI}(\text{OAc})_2(2)$       | 95                     | 5        | 26                     | 32    |
| 19 <sup>e</sup> | $\text{Pd}(\text{TFA})_2(20)$             | $\text{PhI}(\text{OAc})_2(2)$       | 95                     | 5        | 30                     | 40    |
| 20              | $\text{Pd}(\text{TFA})_2(10)$             | $\text{PhI}(\text{OAc})_2(2)$       | 95                     | 2        | 43                     | 26    |
| 21              | $\text{Pd}(\text{TFA})_2(5)$              | $\text{PhI}(\text{OAc})_2(2)$       | 95                     | 2        | 46                     | 15    |
| 22              | $\text{Pd}(\text{TFA})_2(5)$              | $\text{PhI}(\text{OAc})_2(1.5)$     | 60                     | 8        | 73                     | trace |
| 23 <sup>f</sup> | $\text{Pd}(\text{TFA})_2(5)$              | $\text{PhI}(\text{OAc})_2(1.5)$     | 60                     | 8        | 82                     | -     |
| 24              | $\text{Pd}(\text{TFA})_2(5)$              | $\text{PhI}(\text{OAc})_2(3)$       | 60                     | 8        | 33                     | 28    |
| 25              | $\text{Pd}(\text{TFA})_2(5)$              | $\text{PhI}(\text{OAc})_2(3)$       | 80                     | 8        | 31                     | 37    |
| 26              | $\text{Pd}(\text{TFA})_2(10)$             | $\text{PhI}(\text{OAc})_2(3)$       | 80                     | 8        | 32                     | 46    |
| 27 <sup>g</sup> | $\text{Pd}(\text{TFA})_2(10)$             | $\text{PhI}(\text{OAc})_2(3)$       | 100                    | 8        | -                      | 78    |

<sup>a</sup>General conditions: **1a** (0.15 mmol), catalyst (x mol%), oxidant (x equiv.) in  $\text{CF}_3\text{CH}_2\text{OH}$  (0.5 mL), 2-12 h.

<sup>b</sup>Isolated yield. <sup>c</sup>NR: no reaction. <sup>d</sup>Add 2.0 equiv. of TFA. <sup>e</sup>Add 2.0 equiv. of  $\text{CH}_3\text{COOH}$ . <sup>f</sup>2.0 mL of  $\text{CF}_3\text{CH}_2\text{OH}$ . <sup>g</sup>3.0 mL of  $\text{CF}_3\text{CH}_2\text{OH}$ .

### 3. General Procedure

**3.1 General Procedures for the synthesis of 2aa-2e:** A 15 mL pressure vessel equipped with a magnetic stirrer was charged with **1** (0.3 mmol), Pd(TFA)<sub>2</sub> (5.0 mg, 5 mol%), PhI(OAc)<sub>2</sub> (145.0 mg, 1.5 equiv.) and CF<sub>3</sub>CH<sub>2</sub>OH (4.0 mL) as solvent. The reaction mixture was then stirred at 60 °C in oil bath. After completion of the reaction, it was then cooled to room temperature. The solvent was then removed in vacuo and the residue was purified by column chromatography on silica gel to provide the desired product **2**.

**3.2 General Procedures for the synthesis of 3a-3p:** A 15 mL pressure vessel equipped with a magnetic stirrer was charged with starting material (0.3 mmol), Pd(TFA)<sub>2</sub> (10 mg, 10 mol%), PhI(OAc)<sub>2</sub> (290.0 mg, 3.0 equiv.) and CF<sub>3</sub>CH<sub>2</sub>OH (6.0 mL) as solvent. After the reaction mixture was stirred at 100 °C in oil bath. After completion of the reaction, it was then cooled to room temperature. The solvent was then removed in vacuo and the residue was purified by column chromatography on silica gel to provide the desired product **3**.

**3.3 General Procedures for the synthesis of 4a-4m:** A 15 mL pressure vessel equipped with a magnetic stirrer was charged with starting material (0.3 mmol), Pd(TFA)<sub>2</sub> (5.0 mg, 5 mol%), PhI(OAc)<sub>2</sub> (145 mg, 1.5 equiv.) and R<sub>F</sub>CH(R)OH (4.0 mL) as solvent. After the reaction mixture was stirred at 100 °C in oil bath. After completion of the reaction, it was then cooled to room temperature. The reaction mixture was concentrated under reduced pressure and the residue was purified by column chromatography on silica gel to provide the desired product **4**.

**3.4 The procedure for the synthesis of 5:** A 15 mL pressure vessel equipped with a magnetic stirrer was charged with starting material (0.3 mmol), Pd(TFA)<sub>2</sub> (5.0 mg, 5 mol%), PhI(OAc)<sub>2</sub> (145 mg, 1.5 equiv.) and MeOH (4.0 mL) as solvent. After the reaction mixture was stirred at 100 °C in oil bath. After completion of the reaction, it was then cooled to room temperature. The reaction mixture was concentrated under reduced pressure and the residue was purified by column chromatography on silica gel to provide the desired product **5**.



## 4. Mechanism studies

### 4.1 Kinetic isotope effect

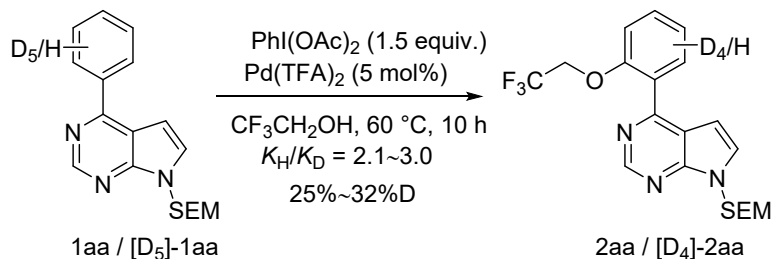

A 15 mL pressure vessel equipped with a magnetic stirrer was charged with **1aa** (0.3 mmol), Pd(TFA)<sub>2</sub> (5.0 mg, 5 mol%), PhI(OAc)<sub>2</sub> (145.0 mg, 1.5 equiv.), *D*<sub>5</sub>-**1aa** (0.3 mmol), and CF<sub>3</sub>CH<sub>2</sub>OH (4.0 mL) as solvent. After the reaction mixture was stirred at 60 °C in oil bath for 10 h before it was cooled to r.t. and the solvent was then removed in vacuo and the residue was purified by column chromatography on silica gel to provide the desired mixture **2aa**/[D<sub>4</sub>]-**2aa**.

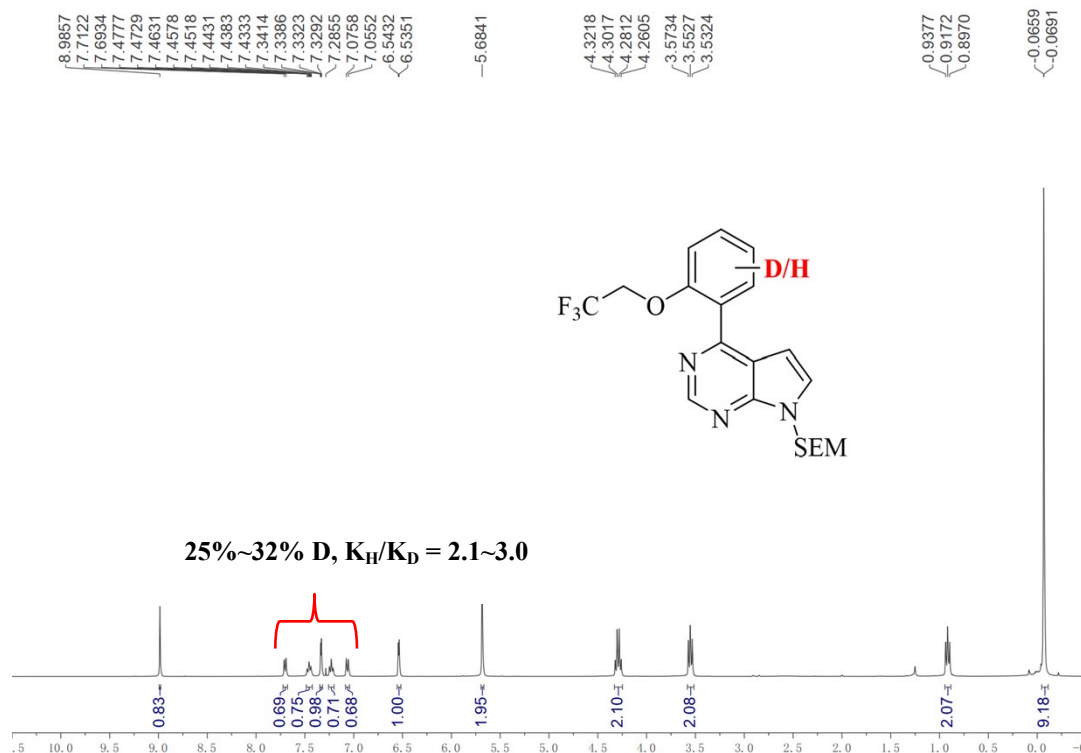

## 4.2 The effects of radical scavengers of this reaction

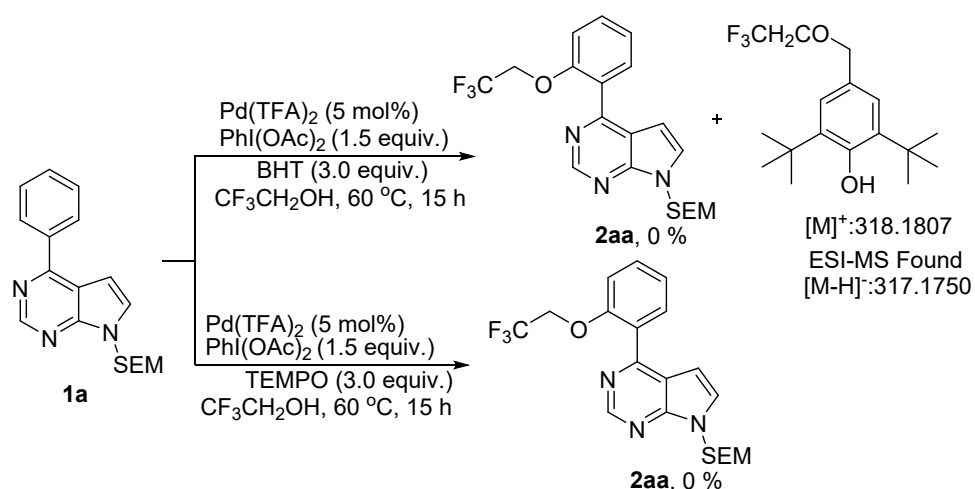

Two 15 mL pressure vessel equipped with a magnetic stirrer was charged with **1a** (0.3 mmol),  $\text{Pd}(\text{TFA})_2$  (5.0 mg, 5 mol%),  $\text{PhI}(\text{OAc})_2$  (145.0 mg, 1.5 equiv.) and 2,2,6,6-tetramethyl-1-piperidinyloxy (TEMPO) (72 mg, 0.46 mmol) or 2,6-di-tert-butyl-4-methylphenol (BHT) (102 mg, 0.46 mmol) was added, respectively, followed by addition of  $\text{CF}_3\text{CH}_2\text{OH}$  (4.0 mL) as solvent. The reaction mixture was then stirred at  $60\text{ }^\circ\text{C}$  in oil bath for 15 h before it was cooled to room temperature. Both no products were observed and the reaction of BHT was detected by ESI-MS analysis.

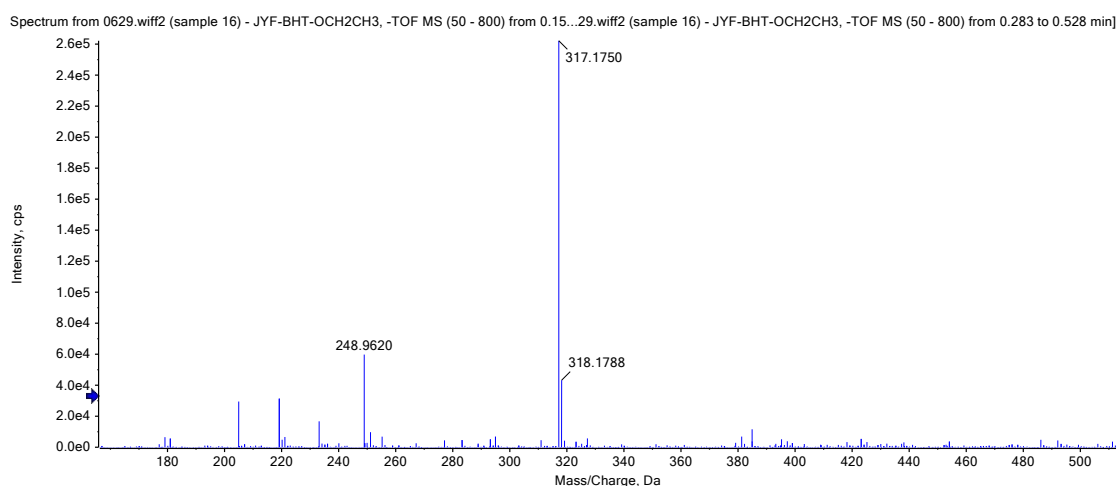

## 5. Characterization of Compounds

### 4-(2-(2,2,2-trifluoroethoxy)phenyl)-7-((2-(trimethylsilyl)ethoxy)methyl)-7H-pyrrolo[2,3-d]pyrimidine (**2aa**)

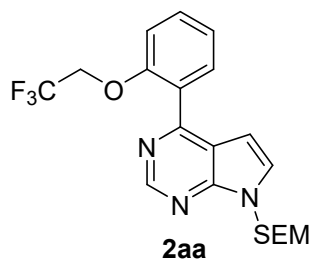

Product **2aa** was purified by PE/EtOAc (6/1); brown oil (104 mg, 82% yield).  $^1\text{H}$  NMR (500 MHz,  $\text{CDCl}_3$ )  $\delta$  8.98 (s, 1H), 7.70 (dd,  $J = 7.6, 1.8$  Hz, 1H), 7.48-7.44 (m, 1H), 7.33 (d,  $J = 3.7$  Hz, 1H), 7.23 (td,  $J = 7.8, 1.0$  Hz, 1H), 7.07 (d,  $J = 8.2$  Hz, 1H), 6.54 (d,  $J = 3.7$  Hz, 1H), 5.69 (s, 2H), 4.29 (q,  $J = 8.2$  Hz, 2H), 3.55 (t,  $J = 8.2$  Hz, 2H), 0.92 (t,  $J = 8.3$  Hz, 2H), -0.07 (s, 9H).  $^{13}\text{C}$  NMR (126 MHz,  $\text{CDCl}_3$ )  $\delta$  155.8, 155.0, 151.8, 151.7, 132.0, 131.0, 128.8, 128.1, 123.4, 123.1 (q,  $J_{\text{C-F}} = 279.0$  Hz), 118.0, 114.7, 102.5, 72.8, 67.2 (q,  $J_{\text{C-F}} = 35.7$  Hz), 66.5, 17.7, -1.6.  $^{19}\text{F}$  NMR (377 MHz,  $\text{CDCl}_3$ )  $\delta$  -73.67 (s, 3F). HRMS  $m/z$  (ESI) calcd for  $\text{C}_{20}\text{H}_{25}\text{F}_3\text{N}_3\text{O}_2\text{Si}$   $[\text{M}+\text{H}]^+$ : 424.1663, found: 424.1644.

### 7-methyl-4-(2-(2,2,2-trifluoroethoxy)phenyl)-7H-pyrrolo[2,3-d]pyrimidine (**2ab**)

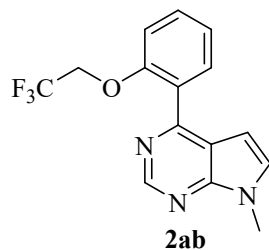

Product **2ab** was purified by PE/EtOAc (4/1); yellow oil (51 mg, 55% yield).  $^1\text{H}$  NMR (400 MHz,  $\text{CDCl}_3$ )  $\delta$  8.99 (s, 1H), 7.70 (dd,  $J = 7.6, 1.8$  Hz, 1H), 7.48 (m, 1H), 7.25 (td,  $J = 7.5, 1.1$  Hz, 1H), 7.18 (d,  $J = 3.6$  Hz, 1H), 7.09 (d,  $J = 8.3$  Hz, 1H), 6.50 (d,  $J = 3.6$  Hz, 1H), 4.30 (q,  $J = 8.2$  Hz, 2H), 3.91 (s, 3H).  $^{13}\text{C}$  NMR (101 MHz,  $\text{CDCl}_3$ )  $\delta$  155.6, 155.1, 151.3, 151.1, 132.0, 130.9, 129.4, 128.9, 123.4, 123.2 (q,  $J_{\text{C-F}} = 279.6$  Hz), 117.9, 114.7, 101.1, 67.2 (q,  $J_{\text{C-F}} = 35.8$  Hz), 31.2.  $^{19}\text{F}$  NMR (377 MHz,  $\text{CDCl}_3$ )  $\delta$  -73.66 (s, 3F). HRMS  $m/z$  (ESI) calcd for  $\text{C}_{15}\text{H}_{13}\text{F}_3\text{N}_3\text{O}$   $[\text{M}+\text{H}]^+$ : 308.1005, found: 308.1001.

### 7-benzyl-4-(2-(2,2,2-trifluoroethoxy)phenyl)-7H-pyrrolo[2,3-d]pyrimidine (**2ac**)

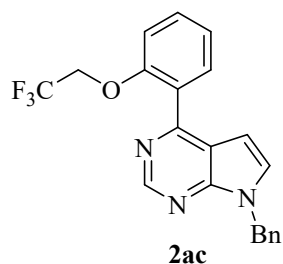

Product **2ac** was purified by PE/EtOAc (4/1); brown oil (49 mg, 43% yield). <sup>1</sup>H NMR (500 MHz, CDCl<sub>3</sub>) δ 9.02 (s, 1H), 7.73 (dd, *J* = 7.6, 1.8 Hz, 1H), 7.49 (td, *J* = 8.3, 1.8 Hz, 1H), 7.36-7.33 (m, 2H), 7.31 (d, *J* = 7.0 Hz, 2H), 7.27 (d, *J* = 8.4 Hz, 2H), 7.25 -7.23 (m, 2H), 7.19 (d, *J* = 3.6 Hz, 1H), 7.10 (d, *J* = 8.3, 1H), 6.53 (d, *J* = 3.6 Hz, 1H), 5.52 (s, 2H), 4.32 (q, *J* = 8.3 Hz, 2H). <sup>13</sup>C NMR (101 MHz, CDCl<sub>3</sub>) δ 155.7, 155.1, 151.5, 151.2, 136.9, 132.0, 131.0, 128.9, 128.8, 128.4, 128.0, 127.5, 123.4, 123.2 (q, *J*<sub>C-F</sub> = 279.6 Hz), 117.9, 114.7, 101.8, 67.2 (q, *J*<sub>C-F</sub> = 35.7 Hz), 47.9. <sup>19</sup>F NMR (377 MHz, CDCl<sub>3</sub>) δ -73.59 (s, 3F). HRMS *m/z* (ESI) calcd for C<sub>21</sub>H<sub>17</sub>F<sub>3</sub>N<sub>3</sub>O [M+H]<sup>+</sup>: 384.1318, found: 384.1299.

### 7-tosyl-4-(2-(2,2,2-trifluoroethoxy)phenyl)-7H-pyrrolo[2,3-d]pyrimidine (**2ad**)

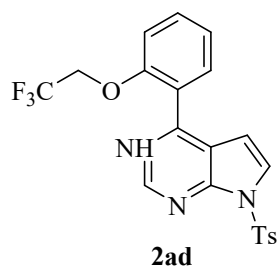

Product **2ad** was purified by PE/EtOAc (4/1); white solid (70 mg, 52% yield). mp: 127.7-128.4 °C. <sup>1</sup>H NMR (500 MHz, CDCl<sub>3</sub>) δ 9.08 (s, 1H), 8.10 (d, *J* = 8.5 Hz, 2H), 7.72 (d, *J* = 4.0 Hz, 1H), 7.63 (dd, *J* = 7.7, 1.8 Hz, 1H), 7.51-7.47 (m, 1H), 7.33 (d, *J* = 7.9 Hz, 2H), 7.22 (td, *J* = 7.5, 1.0 Hz, 1H), 7.05 (d, *J* = 8.4 Hz, 1H), 6.60 (d, *J* = 4.0 Hz, 1H), 4.31 (q, *J* = 8.1 Hz, 2H), 2.39 (s, 3H). <sup>13</sup>C NMR (126 MHz, CDCl<sub>3</sub>) δ 156.9, 154.7, 153.1, 151.4, 145.8, 134.9, 132.0, 131.6, 129.9, 128.2, 127.6, 126.2, 123.4, 123.0 (q, *J*<sub>C-F</sub> = 279.0 Hz), 120.0, 114.0, 105.5, 66.8 (q, *J*<sub>C-F</sub> = 36.0 Hz), 21.7. <sup>19</sup>F NMR (377 MHz, CDCl<sub>3</sub>) δ -73.51 (s, 3F). HRMS *m/z* (ESI) calcd for C<sub>21</sub>H<sub>17</sub>F<sub>3</sub>N<sub>3</sub>O<sub>3</sub>S [M+H]<sup>+</sup>: 448.0937, found: 448.0924.

#### 4-phenyl-7H-pyrrolo[2,3-d]pyrimidin-5-yl acetate (**2af**)

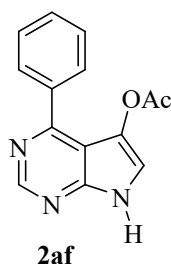

Product **2af** was purified by PE/EtOAc (2/1); white solid (46 mg, 61% yield). mp: 99.6-101.2 °C. <sup>1</sup>H NMR (400 MHz, CDCl<sub>3</sub>) δ 11.47 (s, 1H), 9.02 (s, 1H), 7.89 (dd, *J* = 6.5, 2.9 Hz, 2H), 7.55 (s, 1H), 7.54 (d, *J* = 2.4 Hz, 2H), 7.43 (s, 1H), 2.05 (s, 3H). <sup>13</sup>C NMR (101 MHz, CDCl<sub>3</sub>) δ 168.8, 159.0, 151.4, 149.1, 137.4, 130.0, 129.5, 128.3, 127.6, 115.7, 109.0, 20.6. HRMS *m/z* (ESI) calcd for C<sub>14</sub>H<sub>12</sub>N<sub>3</sub>O<sub>2</sub> [M+H]<sup>+</sup>: 254.0924, found: 254.0919.

#### 4-(4-methyl-2-(2,2,2-trifluoroethoxy)phenyl)-7-((2-(trimethylsilyl)ethoxy)methyl)-7H-pyrrolo[2,3-d]pyrimidine (**2ba**)

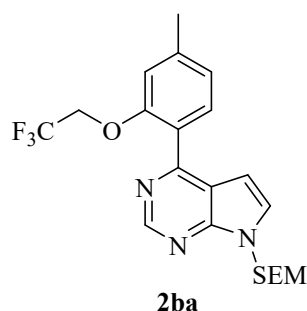

Product **2ba** was purified by PE/EtOAc (4/1); brown oil (97 mg, 74% yield). <sup>1</sup>H NMR (400 MHz, CDCl<sub>3</sub>) δ 8.98 (s, 1H), 7.61 (d, *J* = 7.8 Hz, 1H), 7.32 (d, *J* = 3.7 Hz, 1H), 7.05 (d, *J* = 8.5 Hz, 1H), 6.89 (d, *J* = 1.4 Hz, 1H), 6.55 (d, *J* = 3.7 Hz, 1H), 5.68 (s, 2H), 4.28 (q, *J* = 8.2 Hz, 2H), 3.55 (t, *J* = 7.8 Hz, 2H), 2.43 (s, 3H), 0.92 (t, *J* = 8.3 Hz, 2H), -0.06 (s, 9H). <sup>13</sup>C NMR (101 MHz, CDCl<sub>3</sub>) δ 155.9, 154.9, 151.7, 151.7, 141.6, 131.8, 127.9, 125.9, 124.1, 123.2 (q, *J*<sub>C-F</sub> = 279.5 Hz), 117.9, 115.4, 102.6, 72.8, 67.2 (q, *J*<sub>C-F</sub> = 35.8 Hz), 66.4, 21.6, 17.7, -1.5. <sup>19</sup>F NMR (377 MHz, CDCl<sub>3</sub>) δ -73.70 (s, 3F). HRMS *m/z* (ESI) calcd for C<sub>21</sub>H<sub>27</sub>F<sub>3</sub>N<sub>3</sub>O<sub>2</sub>Si [M+H]<sup>+</sup>: 438.1819, found: 438.1796.

#### 4-(4-(tert-butyl)-2-(2,2,2-trifluoroethoxy)phenyl)-7-((2-(trimethylsilyl)ethoxy)methyl)-7H-pyrrolo[2,3-d]pyrimidine (**2bb**)

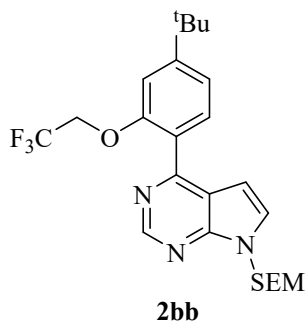

Product **2bb** was purified by PE/EtOAc (4/1); yellowish solid (98 mg, 68% yield). mp: 41.5-42.1 °C. <sup>1</sup>H NMR (400 MHz, CDCl<sub>3</sub>) δ 8.99 (s, 1H), 7.68 (d, *J* = 8.1 Hz, 1H), 7.35 (d, *J* = 3.7 Hz, 1H), 7.30 (d, *J* = 7.9 Hz, 1H), 7.11 (d, *J* = 1.7 Hz, 1H), 6.61 (d, *J* = 3.6 Hz, 1H), 5.71 (s, 2H), 4.29 (q, *J* = 8.3 Hz, 2H), 3.57 (t, *J* = 7.7 Hz, 2H), 1.39 (s, 9H), 0.94 (t, *J* = 7.8 Hz, 2H), -0.05 (s, 9H). <sup>13</sup>C NMR (101 MHz, CDCl<sub>3</sub>) δ 155.9, 155.1, 155.0,

151.8, 151.7, 131.6, 127.9, 126.1, 123.2 (q,  $J_{C-F} = 279.6$  Hz), 120.8, 117.8, 112.7, 102.7, 72.8, 67.6 (q,  $J_{C-F} = 35.6$  Hz), 66.4, 35.1, 31.2 17.7, -1.5.  $^{19}\text{F}$  NMR (377 MHz,  $\text{CDCl}_3$ )  $\delta$ -73.73 (s, 3F). HRMS  $m/z$  (ESI) calcd for  $\text{C}_{24}\text{H}_{33}\text{F}_3\text{N}_3\text{O}_2\text{Si}$   $[\text{M}+\text{H}]^+$ : 480.2289, found: 480.2269.

**4-(3-(2,2,2-trifluoroethoxy)-[1,1'-biphenyl]-4-yl)-7-((2-(trimethylsilyl)ethoxy)methyl)-7H-pyrrolo[2,3-d]pyrimidine (2bc)**

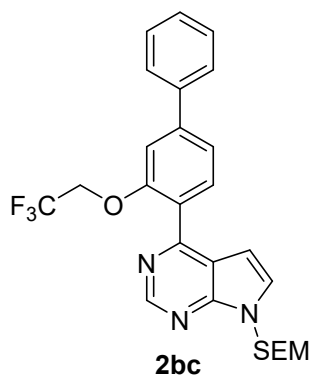

Product **2bc** was purified by PE/EtOAc (10/1); yellowish oil (73 mg, 49% yield).  $^1\text{H}$  NMR (400 MHz,  $\text{CDCl}_3$ )  $\delta$  9.03 (s, 1H), 7.83 (d,  $J = 7.9$  Hz, 1H), 7.67 (d,  $J = 7.0$  Hz, 2H), 7.53 (d,  $J = 5.1$  Hz, 1H), 7.52-7.49 (m, 2H), 7.44 (t,  $J = 7.3$  Hz, 1H), 7.39 (d,  $J = 3.7$  Hz, 1H), 7.31 (d,  $J = 1.6$  Hz, 1H), 6.64 (d,  $J = 3.7$  Hz, 1H), 5.73 (s, 2H), 4.39 (q,  $J = 8.2$  Hz, 2H), 3.59 (t,  $J = 8.2$  Hz, 2H), 0.96 (t,  $J = 8.2$  Hz, 2H), -

0.03 (s, 9H).  $^{13}\text{C}$  NMR (101 MHz,  $\text{CDCl}_3$ )  $\delta$  155.5, 155.4, 151.8, 151.7, 144.4, 140.0, 132.5, 129.0, 128.2, 128.2, 127.6, 127.2, 123.1 (q,  $J_{C-F} = 279.2$  Hz), 122.3, 118.0, 113.6, 102.6, 72.9, 67.3 (q,  $J_{C-F} = 36.0$  Hz), 66.5, 17.7, -1.5.  $^{19}\text{F}$  NMR (377 MHz,  $\text{CDCl}_3$ )  $\delta$  -73.57(s, 3F). HRMS  $m/z$  (ESI) calcd for  $\text{C}_{26}\text{H}_{29}\text{F}_3\text{N}_3\text{O}_2\text{Si}$   $[\text{M}+\text{H}]^+$ : 500.1976, found: 500.1962.

**4-(4-methoxy-2-(2,2,2-trifluoroethoxy)phenyl)-7-((2-(trimethylsilyl)ethoxy)methyl)-7H-pyrrolo[2,3-d]pyrimidine (2bd)**

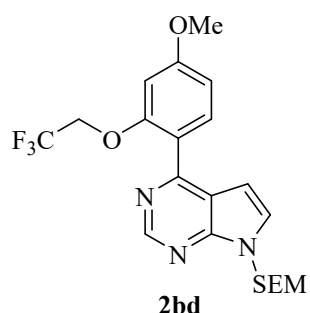

Product **2bd** was purified by PE/EtOAc (5/1); brown oil (99 mg, 73% yield).  $^1\text{H}$  NMR (400 MHz,  $\text{CDCl}_3$ )  $\delta$  8.97 (s, 1H), 7.70 (d,  $J = 8.5$  Hz, 1H), 7.33 (d,  $J = 3.8$  Hz, 1H), 6.78 (dd,  $J = 8.7, 2.3$  Hz, 1H), 6.62 (d,  $J = 2.3$  Hz, 1H), 6.57 (d,  $J = 3.6$  Hz, 1H), 5.69 (s, 2H), 4.28 (q,  $J = 8.2$  Hz, 2H), 3.88 (s, 3H), 3.56 (t,  $J = 8.1$  Hz, 2H), 0.92 (t,  $J = 7.8$  Hz, 2H), -0.06 (s, 9H).  $^{13}\text{C}$  NMR (101 MHz,  $\text{CDCl}_3$ )  $\delta$  162.0, 156.2, 155.7,

151.7, 151.6, 133.1, 127.8, 123.1 (q,  $J_{C-F} = 279.4$  Hz), 121.3, 117.7, 107.9, 102.7, 101.7, 72.8, 67.1 (q,  $J_{C-F} = 36.0$  Hz), 66.4, 55.6, 17.7, -1.5.  $^{19}\text{F}$  NMR (377 MHz,  $\text{CDCl}_3$ )  $\delta$  -73.56 (s, 3F). HRMS  $m/z$  (ESI) calcd for  $\text{C}_{21}\text{H}_{27}\text{F}_3\text{N}_3\text{O}_3\text{Si}$   $[\text{M}+\text{H}]^+$ :

454.1768, found: 454.1749.

**4-(4-chloro-2-(2,2,2-trifluoroethoxy)phenyl)-7-((2-(trimethylsilyl)ethoxy)methyl)-7H-pyrrolo[2,3-d]pyrimidine (2be)**

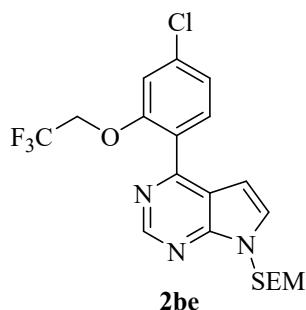

Product **2be** was purified by PE/EtOAc (5/1); brown oil (86 mg, 63% yield). <sup>1</sup>H NMR (400 MHz, CDCl<sub>3</sub>) δ 8.97 (s, 1H), 7.66 (d, *J* = 8.3 Hz, 1H), 7.36 (d, *J* = 3.7 Hz, 1H), 7.23 (dd, *J* = 8.2, 1.9 Hz, 1H), 7.07 (d, *J* = 1.9 Hz, 1H), 6.51 (d, *J* = 3.7 Hz, 1H), 5.69 (s, 2H), 4.31 (q, *J* = 8.1 Hz, 2H), 3.54 (t, *J* = 8.2 Hz, 2H), 0.91 (t, *J* = 8.3 Hz, 2H), -0.07 (s, 9H). <sup>13</sup>C NMR (101 MHz, CDCl<sub>3</sub>) δ 155.4, 154.6, 151.8, 151.6, 136.4, 133.0, 128.4, 127.2, 123.5, 122.8 (q, *J*<sub>C-F</sub> = 279.4 Hz), 117.8, 114.9, 102.2, 72.8, 67.0 (q, *J*<sub>C-F</sub> = 36.1 Hz), 66.5, 17.7, -1.6. <sup>19</sup>F NMR (377 MHz, CDCl<sub>3</sub>) δ -73.55 (s, 3F). HRMS *m/z* (ESI) calcd for C<sub>20</sub>H<sub>24</sub>ClF<sub>3</sub>N<sub>3</sub>O<sub>2</sub>Si [M+H]<sup>+</sup>: 458.1273, found: 458.1269.

**4-(4-fluoro-2-(2,2,2-trifluoroethoxy)phenyl)-7-((2-(trimethylsilyl)ethoxy)methyl)-7H-pyrrolo[2,3-d]pyrimidine (2bf)**

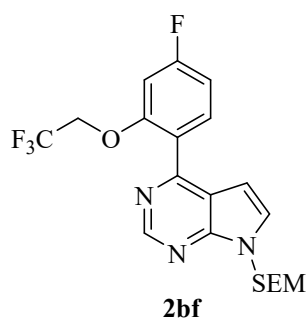

Product **2bf** was purified by PE/EtOAc (6/1); brown oil (71 mg, 54% yield). <sup>1</sup>H NMR (400 MHz, CDCl<sub>3</sub>) δ 8.98 (s, 1H), 7.72 (dd, *J* = 8.5, 6.6 Hz, 1H), 7.36 (d, *J* = 3.6 Hz, 1H), 6.97 (td, *J* = 8.2, 2.2 Hz, 1H), 6.81 (dd, *J* = 10.1, 2.3 Hz, 1H), 6.53 (d, *J* = 3.7 Hz, 1H), 5.70 (s, 2H), 4.31 (q, *J* = 8.0 Hz, 2H), 3.56 (t, *J* = 7.8 Hz, 2H), 0.93 (t, *J* = 7.9 Hz, 2H), -0.05 (s, 9H). <sup>13</sup>C NMR (101 MHz, CDCl<sub>3</sub>) δ 165.4, 162.9, 156.0 (d, *J*<sub>C-F</sub> = 10.1 Hz), 154.9, 151.8, 151.7, 133.4 (d, *J*<sub>C-F</sub> = 10.0 Hz), 128.2, 124.8, 122.8 (q, *J*<sub>C-F</sub> = 227.2 Hz), 117.9, 110.2 (d, *J*<sub>C-F</sub> = 21.3 Hz), 102.3 (t, *J*<sub>C-F</sub> = 13.3 Hz), 72.8, 67.0 (q, *J*<sub>C-F</sub> = 36.2 Hz), 66.4, 17.7, -1.5. <sup>19</sup>F NMR (377 MHz, CDCl<sub>3</sub>) δ -73.50(s, 3F), -108.03(s, 1F). HRMS *m/z* (ESI) calcd for C<sub>20</sub>H<sub>24</sub>F<sub>4</sub>N<sub>3</sub>O<sub>2</sub>Si [M+H]<sup>+</sup>: 442.1568, found: 442.1562.

**4-(2-(2,2,2-trifluoroethoxy)-4-(trifluoromethyl)phenyl)-7-((2-(trimethylsilyl)ethoxy)methyl)-7H-pyrrolo[2,3-d]pyrimidine (2bg)**

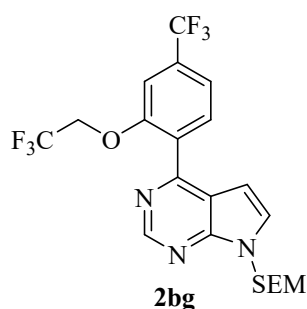

Product **2bg** was purified by PE/EtOAc (4/1); yellowish solid (106 mg, 72% yield). mp: 42.0-42.5 °C. <sup>1</sup>H NMR (400 MHz, CDCl<sub>3</sub>) δ 9.02 (s, 1H), 7.85 (d, *J* = 7.9 Hz, 1H), 7.54 (d, *J* = 7.9 Hz, 1H), 7.40 (d, *J* = 3.6 Hz, 1H), 7.32 (s, 1H), 6.53 (d, *J* = 3.7 Hz, 1H), 5.72 (s, 2H), 4.38 (q, *J* = 8.0 Hz, 2H), 3.57 (t, *J* = 8.2 Hz, 2H), 0.94 (t, *J* = 8.2 Hz, 2H), -0.04 (s, 9H). <sup>13</sup>C NMR (101 MHz, CDCl<sub>3</sub>) δ 155.0, 154.2, 151.8, 151.7, 133.4 (q, *J*<sub>C-F</sub> = 32.9 Hz), 132.7, 132.2, 128.7, 123.5 (q, *J*<sub>C-F</sub> = 273.6 Hz), 122.8 (q, *J*<sub>C-F</sub> = 279.3 Hz), 120.1 (q, *J*<sub>C-F</sub> = 3.5 Hz), 118.0, 111.2 (q, *J*<sub>C-F</sub> = 3.5 Hz), 102.0, 72.9, 67.1 (q, *J*<sub>C-F</sub> = 36.3 Hz), 66.6, 17.7, -1.5. <sup>19</sup>F NMR (377 MHz, CDCl<sub>3</sub>) δ -62.76 (s, 3F), -73.58 (s, 3F). HRMS *m/z* (ESI) calcd for C<sub>21</sub>H<sub>24</sub>F<sub>6</sub>N<sub>3</sub>O<sub>2</sub>Si [M+H]<sup>+</sup>: 492.1536, found: 492.1523.

**4-(5-methyl-2-(2,2,2-trifluoroethoxy)phenyl)-7-((2-(trimethylsilyl)ethoxy)methyl)-7H-pyrrolo[2,3-d]pyrimidine (2ca)**

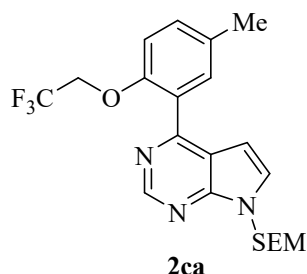

Product **2ca** was purified by PE/EtOAc (5/1); white solid (93 mg, 71% yield). mp: 52.4-53.2 °C. <sup>1</sup>H NMR (400 MHz, CDCl<sub>3</sub>) δ 8.97 (s, 1H), 7.50 (s, 1H), 7.31 (s, 1H), 7.23 (d, *J* = 8.5 Hz, 1H), 6.95 (d, *J* = 8.3 Hz, 1H), 6.53 (s, 1H), 5.67 (s, 2H), 4.21 (q, *J* = 8.1 Hz, 2H), 3.53 (t, *J* = 7.8 Hz, 2H), 2.35 (s, 3H), 0.90 (t, *J* = 7.8 Hz, 2H), -0.08 (s, 9H). <sup>13</sup>C NMR (101 MHz, CDCl<sub>3</sub>) δ 155.8, 152.9, 151.6, 151.5, 132.8, 132.2, 131.3, 128.3, 127.9, 123.0 (q, *J*<sub>C-F</sub> = 279.5 Hz), 117.8, 114.7, 102.5, 72.6, 67.2 (q, *J*<sub>C-F</sub> = 35.6 Hz), 66.3, 20.4, 17.5, -1.7. <sup>19</sup>F NMR (377 MHz, CDCl<sub>3</sub>) δ -78.52 (s, 3F). HRMS *m/z* (ESI) calcd for C<sub>21</sub>H<sub>27</sub>F<sub>3</sub>N<sub>3</sub>O<sub>2</sub>Si [M+H]<sup>+</sup>: 438.1819, found: 438.1811.



**4-(5-chloro-2-(2,2,2-trifluoroethoxy)phenyl)-7-((2-(trimethylsilyl)ethoxy)methyl)-7H-pyrrolo[2,3-d]pyrimidine (2cb)**

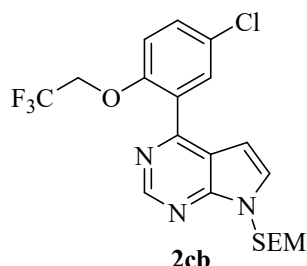

Product **2cb** was Purified by PE/EtOAc (10/1); yellowish oil (71 mg, 52% yield). <sup>1</sup>H NMR (400 MHz, CDCl<sub>3</sub>) δ 8.99 (s, 1H), 7.70 (d, *J* = 2.6 Hz, 1H), 7.43 (dd, *J* = 8.8, 2.7 Hz, 1H), 7.38 (d, *J* = 3.6 Hz, 1H), 7.03 (d, *J* = 8.8 Hz, 1H), 6.54 (d, *J* = 3.7 Hz, 1H), 5.70 (s, 2H), 4.27 (q, *J* = 8.1 Hz, 2H), 3.55 (t, *J* = 8.2 Hz, 2H), 0.93 (t, *J* = 8.2 Hz, 2H), -0.06 (s, 9H). <sup>13</sup>C NMR (101 MHz, CDCl<sub>3</sub>) δ 154.3, 153.6, 151.8, 151.6, 131.8, 130.7, 130.3, 128.6, 128.6, 122.9 (q, *J*<sub>C-F</sub> = 279.5 Hz), 117.8, 116.1, 102.2, 72.9, 67.4 (q, *J*<sub>C-F</sub> = 35.9 Hz), 66.5, 17.7, -1.5. <sup>19</sup>F NMR (377 MHz, CDCl<sub>3</sub>) δ -73.66 (s, 3F). HRMS *m/z* (ESI) calcd for C<sub>20</sub>H<sub>24</sub>ClF<sub>3</sub>N<sub>3</sub>O<sub>2</sub>Si [M+H]<sup>+</sup>: 458.1273, found: 458.1262.

**4-(2-(2,2,2-trifluoroethoxy)-5-(trifluoromethyl)phenyl)-7-((2-(trimethylsilyl)ethoxy)methyl)-7H-pyrrolo[2,3-d]pyrimidine (2cc)**

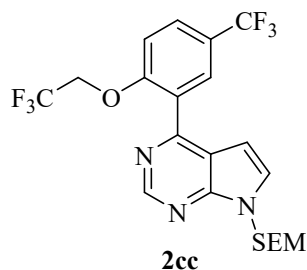

Product **2cc** was Purified by PE/EtOAc (10/1); yellowish oil (94 mg, 64% yield). <sup>1</sup>H NMR (400 MHz, CDCl<sub>3</sub>) δ 9.02 (s, 1H), 8.02 (s, 1H), 7.76 (d, *J* = 8.7 Hz, 1H), 7.40 (d, *J* = 3.8 Hz, 1H), 7.16 (d, *J* = 8.7 Hz, 1H), 6.52 (d, *J* = 3.7 Hz, 1H), 5.72 (s, 2H), 4.40 (q, *J* = 8.0 Hz, 2H), 3.57 (t, *J* = 8.1 Hz, 2H), 0.94 (t, *J* = 8.3 Hz, 2H), -0.05 (s, 9H). <sup>13</sup>C NMR (101 MHz, CDCl<sub>3</sub>) δ 157.1, 154.1, 151.8, 151.7, 129.5 (q, *J*<sub>C-F</sub> = 3.6 Hz), 129.0, 128.6, 128.1 (q, *J*<sub>C-F</sub> = 3.6 Hz), 125.6 (q, *J*<sub>C-F</sub> = 33.4 Hz), 123.8 (q, *J*<sub>C-F</sub> = 272.8 Hz), 122.8 (q, *J*<sub>C-F</sub> = 279.4 Hz), 118.0, 113.7, 102.1, 72.9, 66.7 (q, *J*<sub>C-F</sub> = 28.4 Hz), 66.6, 17.7, -1.6. <sup>19</sup>F NMR (377 MHz, CDCl<sub>3</sub>) δ -61.87 (s, 3F), -73.44 (s, 3F). HRMS *m/z* (ESI) calcd for C<sub>21</sub>H<sub>24</sub>F<sub>6</sub>N<sub>3</sub>O<sub>2</sub>Si [M+H]<sup>+</sup>: 492.1536, found: 492.1535.

**4-(2,2,2-trifluoroethoxy)-3-(7-((2-(trimethylsilyl)ethoxy)methyl)-7H-pyrrolo[2,3-d]pyrimidin-4-yl)benzonitrile (2cd)**

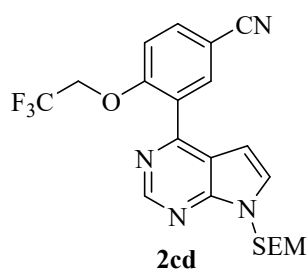

Product **2cd** was Purified by PE/EtOAc (10/1); yellowish solid (58 mg, 43% yield). mp: 72.8-73.4 °C. <sup>1</sup>H NMR (400 MHz, CDCl<sub>3</sub>) δ 9.01 (s, 1H), 8.06 (s, 1H), 7.82 (dd, *J* = 8.6, 2.2 Hz, 1H), 7.42 (d, *J* = 3.8 Hz, 1H), 7.16 (d, *J* = 8.6 Hz, 1H), 6.50 (d, *J* = 3.7 Hz, 1H), 5.73 (s, 2H), 4.43 (q, *J* = 7.9 Hz, 2H), 3.57 (t, *J* = 8.2 Hz, 2H), 0.94 (t, *J* = 8.4 Hz, 2H), -0.04 (s, 9H). <sup>13</sup>C NMR (101 MHz, CDCl<sub>3</sub>) δ 157.69, 153.20, 151.90, 151.71, 136.22, 135.0, 129.8, 128.9, 122.6 (q, *J*<sub>C-F</sub> = 279.4 Hz), 118.0, 117.9, 113.9, 107.1, 101.8, 72.9, 66.4 (q, *J*<sub>C-F</sub> = 36.4 Hz), 66.6, 17.7, -1.5. <sup>19</sup>F NMR (377 MHz, CDCl<sub>3</sub>) δ -73.25 (s, 3F). HRMS *m/z* (ESI) calcd for C<sub>21</sub>H<sub>24</sub>F<sub>3</sub>N<sub>4</sub>O<sub>2</sub>Si [M+H]<sup>+</sup>: 449.1615, found: 449.1612.

**4-(2-methoxy-6-(2,2,2-trifluoroethoxy)phenyl)-7-((2-(trimethylsilyl)ethoxy)methyl)-7H-pyrrolo[2,3-d]pyrimidine (2da)**

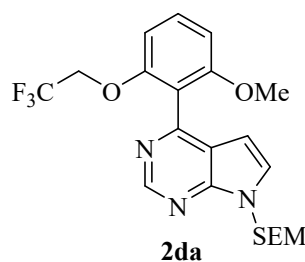

Product **2da** was Purified by PE/EtOAc (4/1); brown oil (96 mg, 71% yield). <sup>1</sup>H NMR (400 MHz, CDCl<sub>3</sub>) δ 8.99 (s, 1H), 7.39 (t, *J* = 8.4 Hz, 1H), 7.29 (d, *J* = 3.8 Hz, 1H), 6.79 (d, *J* = 8.4 Hz, 1H), 6.68 (d, *J* = 8.3 Hz, 1H), 6.31 (d, *J* = 3.6 Hz, 1H), 5.68 (q, *J* = 10.7 Hz, 2H), 4.27-4.20 (m, 2H), 3.71 (s, 3H), 3.56 (t, *J* = 8.0 Hz, 2H), 0.92 (td, *J* = 7.9, 3.1 Hz, 2H), -0.06 (s, 9H). <sup>13</sup>C NMR (101 MHz, CDCl<sub>3</sub>) δ 158.4, 156.1, 154.2, 151.6, 151.5, 130.8, 128.1, 123.0 (q, *J*<sub>C-F</sub> = 279.6 Hz), 119.4, 117.4, 106.8, 106.3, 101.6, 72.7, 67.2 (q, *J*<sub>C-F</sub> = 35.7 Hz), 66.4, 56.0, 17.7, -1.6. <sup>19</sup>F NMR (377 MHz, CDCl<sub>3</sub>) δ -74.09 (s, 3F). HRMS *m/z* (ESI) calcd for C<sub>21</sub>H<sub>27</sub>F<sub>3</sub>N<sub>3</sub>O<sub>3</sub>Si [M+H]<sup>+</sup>: 454.1768, found: 454.1729.

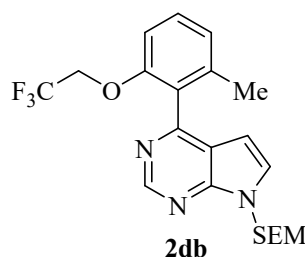

**4-(2-methyl-6-(2,2,2-trifluoroethoxy)phenyl)-7-((2-(trimethylsilyl)ethoxy)methyl)-7H-pyrrolo[2,3-d]pyrimidine (2db)**

Product **2db** was Purified by PE/EtOAc (4/1); orange-yellow oil (81 mg, 62% yield). <sup>1</sup>H NMR (400 MHz, CDCl<sub>3</sub>) δ 9.01 (s, 1H), 7.36 (d, *J* = 2.9 Hz, 1H), 7.34 (d, *J* = 1.4 Hz, 1H), 7.08 (d, *J* =

7.6 Hz, 1H), 6.90 (d,  $J = 8.3$  Hz, 1H), 6.33 (d,  $J = 3.6$  Hz, 1H), 5.72 (q,  $J = 10.8$  Hz, 2H), 4.29-4.15 (m, 2H), 3.57 (dd,  $J = 9.1, 7.4$  Hz, 2H), 2.13 (s, 3H), 0.94 (dd,  $J = 9.2, 7.3$  Hz, 2H), -0.05 (s, 9H).  $^{13}\text{C}$  NMR (101 MHz,  $\text{CDCl}_3$ )  $\delta$  156.4, 155.1, 151.6, 151.5, 138.8, 129.9, 128.6, 127.6, 125.1, 123.0 (q,  $J_{\text{C-F}} = 279.3$  Hz), 118.8, 111.4, 101.5, 72.8, 67.0 (q,  $J_{\text{C-F}} = 35.7$  Hz), 66.5, 19.7, 17.7, -1.6.  $^{19}\text{F}$  NMR (377 MHz,  $\text{CDCl}_3$ )  $\delta$  -74.12 (s, 3F). HRMS  $m/z$  (ESI) calcd for  $\text{C}_{21}\text{H}_{27}\text{F}_3\text{N}_3\text{O}_2\text{Si}$   $[\text{M H}]^+$ : 438.1819, found: 438.1804.

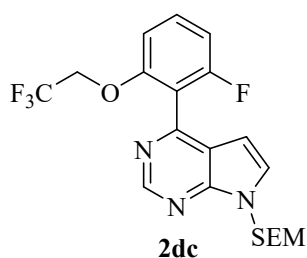

**4-(2-fluoro-6-(2,2,2-trifluoroethoxy)phenyl)-7-((2-(trimethylsilyl)ethoxy)methyl)-7H-pyrrolo[2,3-d]pyrimidine (2dc)**

Product **2dc** was Purified by PE/EtOAc (4/1); brown oil (86 mg, 65% yield).  $^1\text{H}$  NMR (400 MHz,  $\text{CDCl}_3$ )  $\delta$  9.00 (s, 1H), 7.42 (q,  $J = 7.9, 7.4$  Hz, 1H), 7.36 (d,  $J = 3.8$  Hz, 2H), 6.98 (t,  $J = 8.7$  Hz, 1H), 6.86 (d,  $J = 8.4$  Hz, 1H), 6.40 (d,  $J = 3.7$  Hz, 1H), 5.70 (s, 2H), 4.31 (q,  $J = 8.1$  Hz, 2H), 3.56 (t,  $J = 8.2$  Hz, 2H), 0.92 (t,  $J = 8.3$  Hz, 2H), -0.06 (s, 9H).  $^{13}\text{C}$  NMR (101 MHz,  $\text{CDCl}_3$ )  $\delta$  160.8 (d,  $J_{\text{C-F}} = 251.3$  Hz), 156.2 (d,  $J_{\text{C-F}} = 6.6$  Hz), 151.7, 151.4, 151.1, 131.1 (d,  $J_{\text{C-F}} = 10.5$  Hz), 128.8, 123.4 (q,  $J_{\text{C-F}} = 279.4$  Hz), 119.1, 117.0 (d,  $J_{\text{C-F}} = 18.2$  Hz), 110.8 (d,  $J_{\text{C-F}} = 22.3$  Hz), 109.8 (d,  $J_{\text{C-F}} = 3.2$  Hz), 101.4, 72.8, 67.2 (q,  $J_{\text{C-F}} = 36.1$  Hz), 66.5, 17.7, -1.6.  $^{19}\text{F}$  NMR (377 MHz,  $\text{CDCl}_3$ )  $\delta$  -73.91 (s, 3F), -112.70 (s, 1F). HRMS  $m/z$  (ESI) calcd for  $\text{C}_{20}\text{H}_{24}\text{F}_4\text{N}_3\text{O}_2\text{Si}$   $[\text{M}+\text{H}]^+$ : 442.1568, found: 442.1560.

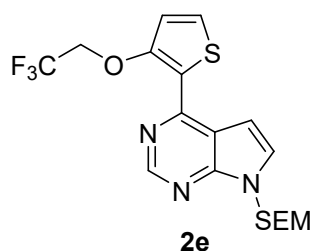

**4-(3-(2,2,2-trifluoroethoxy)thiophen-2-yl)-7-((2-(trimethylsilyl)ethoxy)methyl)-7H-pyrrolo[2,3-d]pyrimidine (2e)**

Product **2e** was purified by PE/EtOAc (10/1); yellowish oil (99 mg, 77% yield).  $^1\text{H}$  NMR (400 MHz,  $\text{CDCl}_3$ )  $\delta$  8.83 (s, 1H), 7.46 (dd,  $J = 5.5, 2.0$  Hz, 1H), 7.35 (dd,  $J = 3.8, 1.2$  Hz, 1H), 7.02 (d,  $J = 3.5$  Hz, 1H), 6.90 (dd,  $J = 5.5, 1.9$  Hz, 1H), 5.65 (s, 2H), 4.44 (q,  $J = 8.2$  Hz, 2H), 3.54 (t,  $J = 8.5$  Hz, 2H), 0.91 (t,  $J = 8.3$  Hz, 2H), -0.07 (s, 9H).  $^{13}\text{C}$  NMR (101 MHz,  $\text{CDCl}_3$ )  $\delta$  153.2, 152.5, 151.2, 150.2, 129.2, 127.7, 123.6, 123.0 (q,  $J_{\text{C-F}} = 279.5$  Hz),

118.2, 114.8, 103.2, 72.8, 68.9 (q,  $J_{C-F} = 35.6$  Hz), 66.5, 17.7, -1.5.  $^{19}\text{F}$  NMR (377 MHz,  $\text{CDCl}_3$ )  $\delta$  -73.68 (s, 3F). HRMS  $m/z$  (ESI) calcd for  $\text{C}_{18}\text{H}_{23}\text{F}_3\text{N}_3\text{O}_2\text{SSi}$   $[\text{M}+\text{H}]^+$ : 430.1227, found: 430.1214.

**4-(2,6-bis(2,2,2-trifluoroethoxy)phenyl)-7-((2-(trimethylsilyl)ethoxy)methyl)-7H-pyrrolo[2,3-d]pyrimidine (3a)**

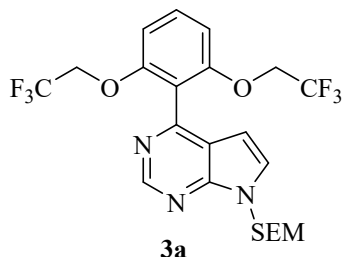

Product **3a** was purified by PE/EtOAc (5/1); orange-yellow oil (122 mg, 78% yield).  $^1\text{H}$  NMR (500 MHz,  $\text{CDCl}_3$ )  $\delta$  8.97 (s, 1H), 7.42 (t,  $J = 8.4$  Hz, 1H), 7.32 (d,  $J = 3.7$  Hz, 1H), 6.81 (d,  $J = 8.5$  Hz, 2H), 6.33 (d,  $J = 3.6$  Hz, 1H), 5.70 (s, 2H), 4.30-4.23 (m, 4H), 3.52 (t,  $J = 8.2$  Hz, 2H), 0.92 (t,  $J = 8.3$  Hz, 2H), -0.08 (s, 9H).  $^{13}\text{C}$  NMR (126 MHz,  $\text{CDCl}_3$ )  $\delta$  156.4, 152.9, 151.6, 151.3, 130.9, 128.3, 122.9 (q,  $J_{C-F} = 279.0$  Hz), 119.4, 119.2, 109.1, 101.4, 72.7, 67.2 (q,  $J_{C-F} = 35.9$  Hz), 66.3, 17.6, -1.7.  $^{19}\text{F}$  NMR (377 MHz,  $\text{CDCl}_3$ )  $\delta$  -74.04 (s, 3F). HRMS  $m/z$  (ESI) calcd for  $\text{C}_{22}\text{H}_{26}\text{F}_6\text{N}_3\text{O}_3\text{Si}$   $[\text{M}+\text{H}]^+$ : 522.1642, found: 522.1629.

**4-(4-methyl-2,6-bis(2,2,2-trifluoroethoxy)phenyl)-7-((2-(trimethylsilyl)ethoxy)methyl)-7H-pyrrolo[2,3-d]pyrimidine (3b)**

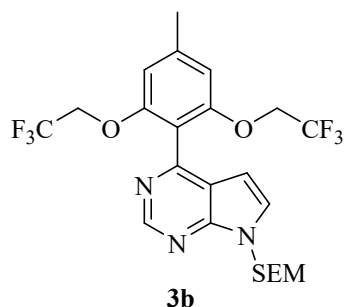

Product **3b** was purified by PE/EtOAc (5/1); yellowish solid (116 mg, 72% yield). mp:107.8-108.4 °C.  $^1\text{H}$  NMR (400 MHz,  $\text{CDCl}_3$ )  $\delta$  8.97 (s, 1H), 7.32 (t,  $J = 3.1$  Hz, 1H), 6.64 (s, 2H), 6.34 (t,  $J = 3.0$  Hz, 1H), 5.71 (s, 2H), 4.27 (q,  $J = 7.8$  Hz, 4H), 3.53 (t,  $J = 8.2$  Hz, 2H), 2.45 (s, 3H), 0.93 (t,  $J = 7.9$  Hz, 2H), -0.06 (s, 9H).  $^{13}\text{C}$  NMR (101 MHz,  $\text{CDCl}_3$ )  $\delta$  151.4, 148.4, 146.6, 146.6, 137.0, 123.5, 118.2 (q,  $J_{C-F} = 279.5$  Hz), 114.6, 111.8, 105.2, 96.9, 68.0, 62.5 (q,  $J_{C-F} = 35.9$  Hz), 61.6, 17.3, 12.9, -6.4.  $^{19}\text{F}$  NMR (377 MHz,  $\text{CDCl}_3$ )  $\delta$  -74.05 (s, 3F). HRMS  $m/z$  (ESI) calcd for  $\text{C}_{23}\text{H}_{28}\text{F}_6\text{N}_3\text{O}_3\text{Si}$   $[\text{M}+\text{H}]^+$ : 536.1799, found: 536.1776.

**4-(4-(tert-butyl)-2,6-bis(2,2,2-trifluoroethoxy)phenyl)-7-((2-(trimethylsilyl)ethoxy)methyl)-7H-pyrrolo[2,3-d]pyrimidine (3c)**

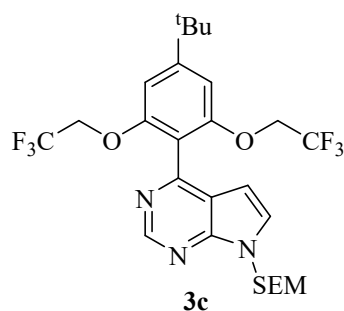

Product **3c** was purified by PE/EtOAc (6/1); yellowish solid (132 mg, 76% yield). mp: 38.7-38.8 °C. <sup>1</sup>H NMR (400 MHz, CDCl<sub>3</sub>) δ 8.98 (s, 1H), 7.34 (d, *J* = 3.7 Hz, 1H), 6.85 (s, 2H), 6.39 (d, *J* = 3.7 Hz, 1H), 5.72 (s, 2H), 4.31-4.24 (m, 4H), 3.57 (t, *J* = 8.2 Hz, 2H), 1.39 (s, 9H), 0.94 (t, *J* = 8.2 Hz, 2H), -0.06 (s, 9H). <sup>13</sup>C NMR (101 MHz, CDCl<sub>3</sub>) δ 156.1, 155.4, 153.2, 151.6, 151.3, 128.2, 123.0 (q, *J*<sub>C-F</sub> = 279.6 Hz), 119.3, 117.1, 107.3, 101.7, 72.7, 67.6 (q, *J*<sub>C-F</sub> = 35.8 Hz), 66.3, 35.4, 31.2, 17.7, -1.6. <sup>19</sup>F NMR (377 MHz, CDCl<sub>3</sub>) δ -74.04 (s, 3F). HRMS *m/z* (ESI) calcd for C<sub>26</sub>H<sub>34</sub>F<sub>6</sub>N<sub>3</sub>O<sub>3</sub>Si [M+H]<sup>+</sup>: 578.2268, found: 578.2252.

**(3,5-bis(2,2,2-trifluoroethoxy)-4-(7-((2-(trimethylsilyl)ethoxy)methyl)-7H-pyrrolo[2,3-d]pyrimidin-4-yl)phenyl)methanol (3d)**

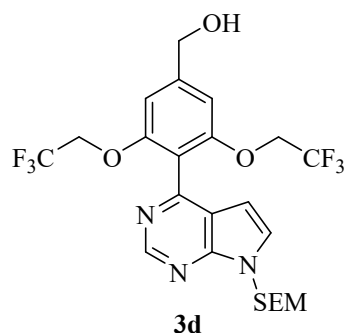

Product **3d** was purified by PE/EtOAc (2/1); yellow oil (117 mg, 71% yield). <sup>1</sup>H NMR (400 MHz, CDCl<sub>3</sub>) δ 8.99 (s, 1H), 7.35 (d, *J* = 3.7 Hz, 1H), 6.66 (s, 2H), 6.29 (d, *J* = 3.7 Hz, 1H), 5.73 (s, 2H), 4.73 (s, 2H), 4.21 (q, *J* = 8.1 Hz, 4H), 3.54 (t, *J* = 8.2 Hz, 2H), 0.94 (t, *J* = 8.4 Hz, 2H), -0.06 (s, 9H). <sup>13</sup>C NMR (101 MHz, CDCl<sub>3</sub>) δ 156.0, 152.8, 151.6, 151.0, 147.0, 128.7, 122.8 (q, *J*<sub>C-F</sub> = 279.5 Hz), 119.2, 116.0, 105.1, 101.5, 72.8, 66.7 (q, *J*<sub>C-F</sub> = 35.8 Hz), 66.4, 63.1, 17.7, -1.6. <sup>19</sup>F NMR (377 MHz, CDCl<sub>3</sub>) δ -74.02 (s, 3F). HRMS *m/z* (ESI) calcd for C<sub>23</sub>H<sub>28</sub>F<sub>6</sub>N<sub>3</sub>O<sub>4</sub>Si [M+H]<sup>+</sup>: 552.1748, found: 552.1730.

**4-(4-methoxy-2,6-bis(2,2,2-trifluoroethoxy)phenyl)-7-((2-(trimethylsilyl)ethoxy)methyl)-7H-pyrrolo[2,3-d]pyrimidine (3e)**

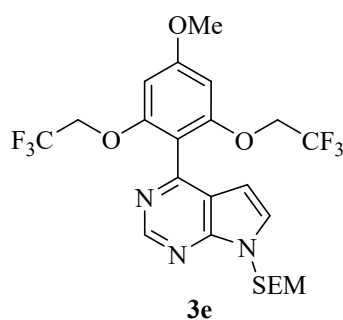

Product **3e** was purified by PE/EtOAc (5/1); yellow oil (124 mg, 75% yield). <sup>1</sup>H NMR (400 MHz, CDCl<sub>3</sub>) δ 8.95 (s, 1H), 7.31 (d, *J* = 3.7 Hz, 1H), 6.35 (s, 2H), 6.34 (d, *J* = 3.6 Hz, 1H), 5.69 (s, 2H), 4.28-4.21 (m, 4H), 3.86 (s, 3H), 3.52 (t, *J* = 8.2 Hz, 2H), 0.91 (t, *J* = 8.3 Hz, 2H), -0.08 (s, 9H). <sup>13</sup>C NMR (101 MHz, CDCl<sub>3</sub>) δ 162.0, 157.2, 152.9, 151.6, 151.2, 128.2, 122.9 (q, *J*<sub>C-F</sub> = 279.6 Hz), 119.4, 112.1, 101.7, 95.9, 72.7, 67.3 (q, *J*<sub>C-F</sub> = 35.9 Hz), 66.3, 55.7, 17.6, -17. <sup>19</sup>F NMR (377 MHz, CDCl<sub>3</sub>) δ -73.99 (s, 3F). HRMS *m/z* (ESI) calcd for C<sub>23</sub>H<sub>28</sub>F<sub>6</sub>N<sub>3</sub>O<sub>4</sub>Si [M+H]<sup>+</sup>: 552.1748, found: 552.1727.

**4-(3,5-bis(2,2,2-trifluoroethoxy)-[1,1'-biphenyl]-4-yl)-7-((2-(trimethylsilyl)ethoxy)methyl)-7H-pyrrolo[2,3-d]pyrimidine (3f)**

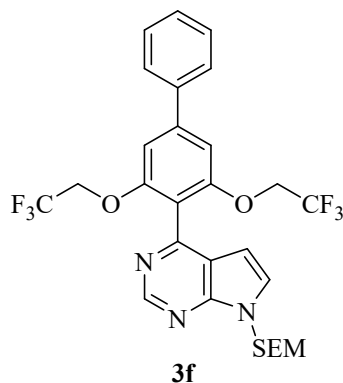

Product **3f** was purified by PE/EtOAc (8/1); yellowish oil (131 mg, 73% yield). <sup>1</sup>H NMR (400 MHz, CDCl<sub>3</sub>) δ 9.04 (s, 1H), 7.62 (d, *J* = 6.8 Hz, 2H), 7.52 (t, *J* = 7.3 Hz, 2H), 7.47 (d, *J* = 7.2 Hz, 1H), 7.42 (d, *J* = 3.7 Hz, 1H), 7.02 (s, 2H), 6.47 (d, *J* = 3.6 Hz, 1H), 5.75 (s, 2H), 4.41 (q, *J* = 8.1 Hz, 4H), 3.56 (t, *J* = 8.2 Hz, 2H), 0.95 (t, *J* = 8.3 Hz, 2H), -0.05 (s, 9H). <sup>13</sup>C NMR (101 MHz, CDCl<sub>3</sub>) δ 156.5, 151.7, 145.4, 139.8, 129.1, 128.6, 127.21, 122.9 (q, *J*<sub>C-F</sub> = 279.5 Hz), 119.2, 108.0, 102.1, 72.9, 67.3 (q, *J*<sub>C-F</sub> = 35.9 Hz), 66.5, 17.7, -1.6. <sup>19</sup>F NMR (377 MHz, CDCl<sub>3</sub>) δ -73.83 (s, 3F). HRMS *m/z* (ESI) calcd for C<sub>28</sub>H<sub>30</sub>F<sub>6</sub>N<sub>3</sub>O<sub>3</sub>Si [M+H]<sup>+</sup>: 598.1955, found: 598.1935.

**4-(4-fluoro-2,6-bis(2,2,2-trifluoroethoxy)phenyl)-7-((2-(trimethylsilyl)ethoxy)methyl)-7H-pyrrolo[2,3-d]pyrimidine (3g)**

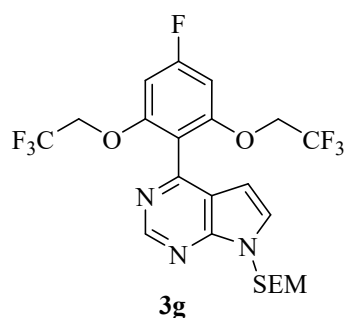

Product **3g** was purified by PE/EtOAc (5/1); brown oil (110 mg, 68% yield).  $^1\text{H}$  NMR (400 MHz,  $\text{CDCl}_3$ )  $\delta$  8.99 (s, 1H), 7.37 (d,  $J = 3.7$  Hz, 1H), 7.06 (s, 2H), 6.32 (d,  $J = 3.7$  Hz, 1H), 5.72 (s, 2H), 4.37-4.31 (m, 4H), 3.54 (t,  $J = 8.3$  Hz, 2H), 0.93 (t,  $J = 8.3$  Hz, 2H), -0.07 (s, 9H).  $^{13}\text{C}$  NMR (101 MHz,  $\text{CDCl}_3$ )  $\delta$  156.6, 151.6 (d,  $J_{\text{C-F}} = 35.1$  Hz), 151.4, 133.2 (q,  $J_{\text{C-F}} = 33.6$  Hz), 128.9, 123.2 (q,  $J_{\text{C-F}} = 273.9$  Hz), 122.6 (q,  $J_{\text{C-F}} = 279.5$  Hz), 122.4, 118.9, 105.9 (d,  $J_{\text{C-F}} = 3.8$  Hz), 101.0, 72.8, 67.2 (q,  $J_{\text{C-F}} = 36.3$  Hz), 66.4, 17.6, -1.7.  $^{19}\text{F}$  NMR (377 MHz,  $\text{CDCl}_3$ )  $\delta$  -63.01 (s, 1F), -73.99 (s, 3F). HRMS  $m/z$  (ESI) calcd for  $\text{C}_{22}\text{H}_{25}\text{F}_7\text{N}_3\text{O}_3\text{Si}$   $[\text{M}+\text{H}]^+$ : 540.1548, found: 540.1545.

**4-(4-chloro-2,6-bis(2,2,2-trifluoroethoxy)phenyl)-7-((2-(trimethylsilyl)ethoxy)methyl)-7H-pyrrolo[2,3-d]pyrimidine (3h)**

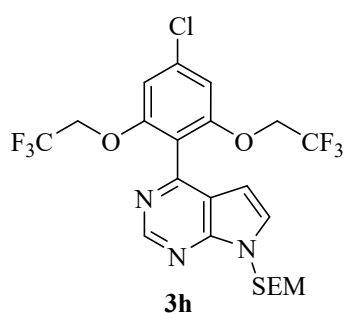

Product **3h** was purified by PE/EtOAc (5/1); yellow oil (120 mg, 72% yield).  $^1\text{H}$  NMR (400 MHz,  $\text{CDCl}_3$ )  $\delta$  8.97 (s, 1H), 7.35 (d,  $J = 3.7$  Hz, 1H), 6.83 (s, 2H), 6.32 (d,  $J = 3.6$  Hz, 1H), 5.71 (s, 2H), 4.31-4.25 (m, 4H), 3.53 (t,  $J = 8.2$  Hz, 2H), 0.92 (t,  $J = 8.2$  Hz, 2H), -0.07 (s, 9H).  $^{13}\text{C}$  NMR (101 MHz,  $\text{CDCl}_3$ )  $\delta$  156.6, 151.8, 151.7, 151.3, 136.4, 128.7, 122.6 (q,  $J_{\text{C-F}} = 279.6$  Hz), 119.1, 117.6, 109.7, 101.2, 72.8, 67.2 (q,  $J_{\text{C-F}} = 36.2$  Hz), 66.4, 17.6, -1.6.  $^{19}\text{F}$  NMR (377 MHz,  $\text{CDCl}_3$ )  $\delta$  -73.94 (s, 3F). HRMS  $m/z$  (ESI) calcd for  $\text{C}_{22}\text{H}_{25}\text{ClF}_6\text{N}_3\text{O}_3\text{Si}$   $[\text{M}+\text{H}]^+$ : 556.1252, found: 556.1229.

**4-(4-bromo-2,6-bis(2,2,2-trifluoroethoxy)phenyl)-7-((2-(trimethylsilyl)ethoxy)methyl)-7H-pyrrolo[2,3-d]pyrimidine (3i)**

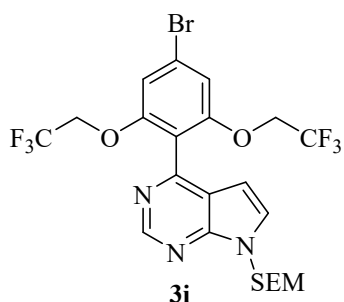

Product **3i** was purified by PE/EtOAc (10/1); yellow oil (120 mg, 67% yield). <sup>1</sup>H NMR (400 MHz, CDCl<sub>3</sub>) δ 8.97 (s, 1H), 7.35 (d, *J* = 3.7 Hz, 1H), 6.99 (s, 2H), 6.32 (d, *J* = 3.7 Hz, 1H), 5.72 (s, 2H), 4.31-4.25 (m, 4H), 3.53 (t, *J* = 8.2 Hz, 2H), 0.93 (t, *J* = 8.2 Hz, 2H), -0.07 (s, 9H). <sup>13</sup>C NMR (101 MHz, CDCl<sub>3</sub>) δ 156.7, 151.9, 151.7, 151.4, 128.6, 123.8, 122.6 (q, *J*<sub>C-F</sub> = 279.4 Hz), 119.1, 118.3, 112.7, 101.2, 72.8, 67.3 (q, *J*<sub>C-F</sub> = 36.3 Hz), 66.4, 17.7, -1.6. <sup>19</sup>F NMR (377 MHz, CDCl<sub>3</sub>) δ -73.95 (s, 3F). HRMS *m/z* (ESI) calcd for C<sub>22</sub>H<sub>25</sub>BrF<sub>6</sub>N<sub>3</sub>O<sub>3</sub>Si [M+H]<sup>+</sup>: 600.0747, found: 600.0729.

**1-(3,5-bis(2,2,2-trifluoroethoxy)-4-(7-((2-(trimethylsilyl)ethoxy)methyl)-7H-pyrrolo[2,3-d]pyrimidin-4-yl)phenyl)ethan-1-one (3j)**

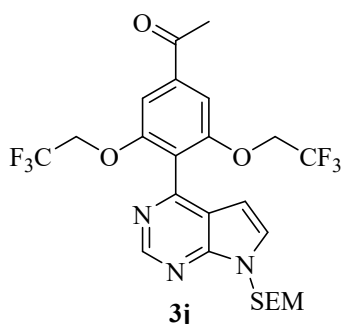

Product **3j** was purified by PE/EtOAc (5/1); yellow oil (101 mg, 60% yield). <sup>1</sup>H NMR (400 MHz, CDCl<sub>3</sub>) δ 8.99 (s, 1H), 7.40 (s, 2H), 7.36 (d, *J* = 3.6 Hz, 1H), 6.30 (d, *J* = 3.7 Hz, 1H), 5.72 (s, 2H), 4.40-4.32 (m, 4H), 3.53 (t, *J* = 8.2 Hz, 2H), 2.67 (s, 3H), 0.93 (t, *J* = 8.2 Hz, 2H), -0.07 (s, 9H). <sup>13</sup>C NMR (101 MHz, CDCl<sub>3</sub>) δ 196.2, 156.5, 151.8, 151.7, 151.3, 139.4, 128.8, 123.6, 122.7 (q, *J*<sub>C-F</sub> = 279.6 Hz), 118.9, 108.8, 101.1, 72.8, 67.2 (q, *J*<sub>C-F</sub> = 36.1 Hz), 66.4, 26.7, 17.6, -1.6. <sup>19</sup>F NMR (377 MHz, CDCl<sub>3</sub>) δ -73.93 (s, 3F). HRMS *m/z* (ESI) calcd for C<sub>24</sub>H<sub>28</sub>F<sub>6</sub>N<sub>3</sub>O<sub>4</sub>Si [M+H]<sup>+</sup>: 564.1748, found: 564.1734.



**1-(3-(2,2,2-trifluoroethoxy)-4-(7-((2-(trimethylsilyl)ethoxy)methyl)-7H-pyrrolo[2,3-d]pyrimidin-4-yl)phenyl)ethan-1-one (3j)**

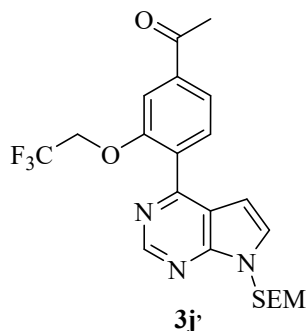

Product **3j** was purified by PE/EtOAc (8/1); yellowish oil (10 mg, 7% yield). <sup>1</sup>H NMR (400 MHz, CDCl<sub>3</sub>) δ 9.00 (s, 1H), 7.81 (dd, *J* = 7.6, 19.9 Hz, 2H), 7.68 (s, 1H), 7.38 (d, *J* = 3.8 Hz, 1H), 6.51 (d, *J* = 3.8 Hz, 1H), 5.71 (s, 2H), 4.41 (q, *J* = 8.0 Hz, 2H), 3.56 (t, *J* = 8.2 Hz, 2H), 2.67 (s, 3H), 0.92 (t, *J* = 8.2 Hz, 2H), -0.06 (s, 9H). <sup>13</sup>C

NMR (101 MHz, CDCl<sub>3</sub>) δ 197.0, 155.1, 154.5, 151.8, 151.6, 139.2, 133.0, 132.4, 128.6, 123.5, 122.9 (q, *J*<sub>C-F</sub> = 279.4 Hz), 118.0, 112.6, 102.2, 72.9, 66.7 (q, *J*<sub>C-F</sub> = 36.2 Hz), 66.5, 26.7, 17.7, -1.5. <sup>19</sup>F NMR (376 MHz, CDCl<sub>3</sub>) δ -73.52. HRMS (ESI) calcd for C<sub>22</sub>H<sub>27</sub>F<sub>3</sub>N<sub>3</sub>O<sub>3</sub>Si [M+H]<sup>+</sup>: 466.1768, found: 466.1779.

**methyl 3,5-bis(2,2,2-trifluoroethoxy)-4-(7-((2-(trimethylsilyl)ethoxy)methyl)-7H-pyrrolo[2,3-d]pyrimidin-4-yl)benzoate (3k)**

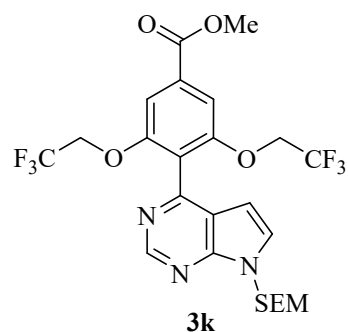

Product **3k** was purified by PE/EtOAc (5/1); yellow oil (123 mg, 71% yield). <sup>1</sup>H NMR (400 MHz, CDCl<sub>3</sub>) δ 8.98 (s, 1H), 7.48 (s, 2H), 7.35 (d, *J* = 3.5 Hz, 1H), 6.30 (d, *J* = 3.7 Hz, 1H), 5.71 (s, 2H), 4.40-4.31 (m, 4H), 3.97 (d, *J* = 1.8 Hz, 3H), 3.52 (t, *J* = 8.2 Hz, 2H), 0.91 (t, *J* = 8.3 Hz, 2H), -0.08 (d, *J* = 1.1 Hz, 9H). <sup>13</sup>C NMR (101 MHz, CDCl<sub>3</sub>) δ 165.5, 156.2, 151.9, 151.7, 151.2, 132.8, 128.8, 122.9, 122.7 (q, *J*<sub>C-F</sub> = 279.5 Hz), 118.9, 109.4, 101.1, 72.7, 66.9 (q, *J*<sub>C-F</sub> = 36.3 Hz), 66.4, 52.7, 17.6, -1.7. <sup>19</sup>F NMR (377 MHz, CDCl<sub>3</sub>) δ -73.96 (s, 3F). HRMS (ESI) calcd for C<sub>24</sub>H<sub>28</sub>F<sub>6</sub>N<sub>3</sub>O<sub>5</sub>Si [M+H]<sup>+</sup>: 580.1697, found: 580.1680.

**methyl 3-(2,2,2-trifluoroethoxy)-4-(7-((2-(trimethylsilyl)ethoxy)methyl)-7H-pyrrolo[2,3-d]pyrimidin-4-yl)benzoate (3k)**

Product **3k** was purified by PE/EtOAc (8/1); yellowish oil (13 mg, 9% yield). <sup>1</sup>H

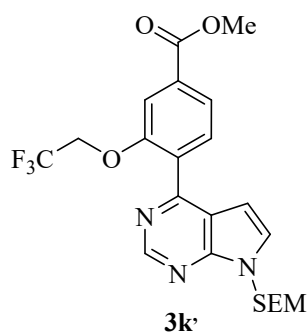

NMR (400 MHz, CDCl<sub>3</sub>) δ 9.00 (s, 1H), 7.92 (d, *J* = 8.0 Hz, 1H), 7.79 (d, *J* = 7.8 Hz, 1H), 7.75 (s, 1H), 7.38 (d, *J* = 3.7 Hz, 1H), 6.52 (d, *J* = 3.7 Hz, 1H), 5.71 (s, 2H), 4.41 (q, *J* = 8.0 Hz, 2H), 3.97 (s, 3H), 3.56 (t, *J* = 8.2 Hz, 2H), 0.93 (t, *J* = 8.2 Hz, 2H), -0.06 (s, 9H). <sup>13</sup>C NMR (101 MHz, CDCl<sub>3</sub>) δ 166.1, 154.7, 154.7, 151.8, 151.6, 132.8, 132.5, 132.2, 128.6,

124.2, 122.9 (q, *J*<sub>C-F</sub> = 279.4 Hz), 118.0, 114.7, 102.2, 72.9, 66.8 (q, *J*<sub>C-F</sub> = 36.1 Hz), 66.52, 52.51, 17.70, -1.55. <sup>19</sup>F NMR (376 MHz, CDCl<sub>3</sub>) δ -73.55. HRMS (ESI) calcd for C<sub>22</sub>H<sub>27</sub>F<sub>3</sub>N<sub>3</sub>O<sub>4</sub>Si [M+H]<sup>+</sup>: 482.1717, found: 482.1708.

**ethyl 3,5-bis(2,2,2-trifluoroethoxy)-4-(7-((2-(trimethylsilyl)ethoxy)methyl)-7H-pyrrolo[2,3-d]pyrimidin-4-yl)benzoate (3l)**

Product **3l** was purified by PE/EtOAc (5/1); yellow oil (103 mg, 69% yield). <sup>1</sup>H NMR

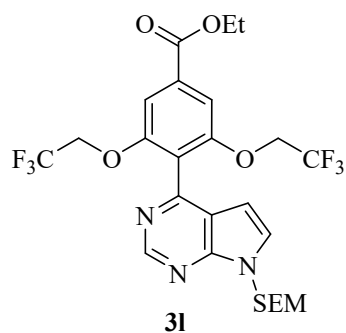

(400 MHz, CDCl<sub>3</sub>) δ 8.97 (s, 1H), 7.48 (s, 2H), 7.34 (d, *J* = 3.0 Hz, 1H), 6.29 (d, *J* = 3.6 Hz, 1H), 5.70 (s, 2H), 4.46-4.40 (m, 3H), 4.38-4.30 (m, 4H), 3.52 (t, *J* = 8.2 Hz, 2H), 1.42 (dd, *J* = 4.9, 2.3 Hz, 2H), 0.91 (t, *J* = 8.2 Hz, 2H), -0.09 (d, *J* = 1.4 Hz, 9H). <sup>13</sup>C NMR (101 MHz, CDCl<sub>3</sub>) δ 165.0, 156.1, 151.9, 151.7, 151.3, 133.2, 128.7, 122.9, 122.7 (q, *J*<sub>C-F</sub> = 279.5 Hz), 118.9, 109.5, 101.1, 72.7, 67.0 (q, *J*<sub>C-F</sub> = 36.1 Hz),

66.3, 61.8, 17.6, 14.3, -1.7. <sup>19</sup>F NMR (377 MHz, CDCl<sub>3</sub>) δ -73.99 (d, *J* = 3.5 Hz, 3F). HRMS (ESI) calcd for C<sub>25</sub>H<sub>30</sub>F<sub>6</sub>N<sub>3</sub>O<sub>5</sub>Si [M+H]<sup>+</sup>: 594.1853, found: 594.1830.

**3,5-bis(2,2,2-trifluoroethoxy)-4-(7-((2-(trimethylsilyl)ethoxy)methyl)-7H-pyrrolo[2,3-*d*]pyrimidin-4-yl)benzonitrile (**3m**)**

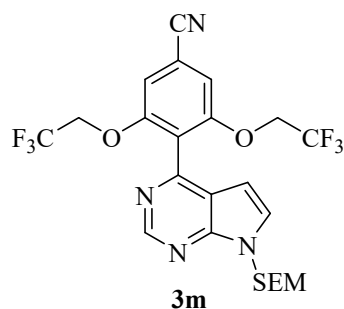

Product **3m** was purified by PE/EtOAc (10/1); yellow oil (79 mg, 48% yield). <sup>1</sup>H NMR (400 MHz, CDCl<sub>3</sub>) δ 8.99 (s, 1H), 7.39 (d, *J* = 3.7 Hz, 1H), 7.11 (s, 2H), 6.30 (d, *J* = 3.7 Hz, 1H), 5.73 (s, 2H), 4.36-4.30 (m, 4H), 3.55 (t, *J* = 8.2 Hz, 2H), 0.94 (t, *J* = 8.2 Hz, 2H), -0.06 (s, 9H). <sup>13</sup>C NMR (101 MHz, CDCl<sub>3</sub>) δ 156.6, 151.8, 151.4, 150.7, 129.1, 123.9, 122.5 (q, *J*<sub>C-F</sub> = 279.8 Hz), 118.8, 117.4, 114.5, 112.4, 100.8, 72.8, 67.2 (q, *J*<sub>C-F</sub> = 36.7 Hz), 66.5, 17.7, -1.6. <sup>19</sup>F NMR (377 MHz, CDCl<sub>3</sub>) δ -73.82 (s, 3F). HRMS *m/z* (ESI) calcd for C<sub>23</sub>H<sub>25</sub>F<sub>6</sub>N<sub>4</sub>O<sub>3</sub>Si [M+H]<sup>+</sup>: 547.1595, found: 547.1580.

**3-(2,2,2-trifluoroethoxy)-4-(7-((2-(trimethylsilyl)ethoxy)methyl)-7H-pyrrolo[2,3-*d*]pyrimidin-4-yl)benzonitrile (**3m'**)**

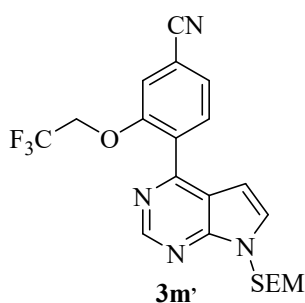

Product **3m'** was purified by PE/EtOAc (6/1); yellow oil (50 mg, 37% yield). <sup>1</sup>H NMR (400 MHz, CDCl<sub>3</sub>) δ 9.01 (s, 1H), 7.85 (d, *J* = 7.9 Hz, 1H), 7.57 (dd, *J* = 7.9, 1.4 Hz, 1H), 7.42 (d, *J* = 3.8 Hz, 1H), 7.37 (d, *J* = 1.4 Hz, 1H), 6.51 (d, *J* = 3.7 Hz, 1H), 5.72 (s, 2H), 4.36 (q, *J* = 7.9 Hz, 2H), 3.58 (t, *J* = 8.2 Hz, 2H), 0.94 (t, *J* = 8.3 Hz, 2H), -0.04 (s, 9H). <sup>13</sup>C NMR (101 MHz, CDCl<sub>3</sub>) δ 155.0, 153.6, 151.9, 151.7, 133.5, 133.1, 129.0, 127.0, 122.7 (q, *J*<sub>C-F</sub> = 279.4 Hz), 117.9, 117.9, 117.5, 114.4, 101.9, 72.9, 67.1 (q, *J*<sub>C-F</sub> = 36.5 Hz), 66.6, 17.7, -1.5. <sup>19</sup>F NMR (377 MHz, CDCl<sub>3</sub>) δ -73.44 (s, 3F). HRMS (ESI) calcd for C<sub>21</sub>H<sub>24</sub>F<sub>3</sub>N<sub>4</sub>O<sub>2</sub>Si [M+H]<sup>+</sup>: 449.1615, found: 449.1610.

**4-(2,6-bis(2,2,2-trifluoroethoxy)-4-(trifluoromethyl)phenyl)-7-((2-(trimethylsilyl)ethoxy)methyl)-7H-pyrrolo[2,3-*d*]pyrimidine (**3n**)**

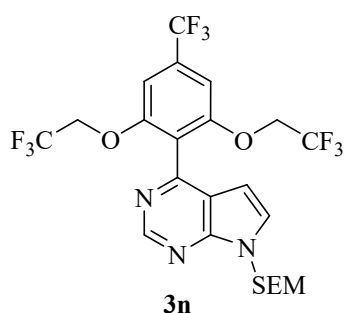

Product **3n** was purified by PE/EtOAc (5/1); yellow oil (85 mg, 48% yield). <sup>1</sup>H NMR (400 MHz, CDCl<sub>3</sub>) δ 8.94 (s, 1H), 7.32 (d, *J* = 3.8 Hz, 1H), 6.53 (d, *J* = 9.9 Hz, 2H), 6.30 (d, *J* = 3.7 Hz, 1H), 5.68 (s, 2H), 4.24 (q, *J* = 7.9 Hz, 4H), 3.51 (t, *J* = 8.2 Hz, 2H), 0.90 (t, *J* = 8.6 Hz, 2H), -0.09 (s, 9H). <sup>13</sup>C

NMR (101 MHz, CDCl<sub>3</sub>)  $\delta$  165.2, 162.8, 157.0 (d,  $J_{C-F}$  = 12.7 Hz), 152.0, 151.7, 151.3, 128.5, 122.6 (q,  $J_{C-F}$  = 279.5 Hz), 119.2, 115.0 (d,  $J_{C-F}$  = 3.9 Hz), 101.2, 96.9 (d,  $J_{C-F}$  = 25.8 Hz), 72.7, 67.0 (q,  $J_{C-F}$  = 36.4 Hz), 66.3, 17.6, -1.7. <sup>19</sup>F NMR (377 MHz, CDCl<sub>3</sub>)  $\delta$  -73.97 (s, 3F), -106.49 (s, 3F). HRMS (ESI) calcd for C<sub>23</sub>H<sub>25</sub>F<sub>9</sub>N<sub>3</sub>O<sub>3</sub>Si [M+H]<sup>+</sup>: 590.1516, found: 590.1502.

**4-(3-methoxy-2,6-bis(2,2,2-trifluoroethoxy)phenyl)-7-((2-(trimethylsilyl)ethoxy)methyl)-7H-pyrrolo[2,3-d]pyrimidine (3o)**

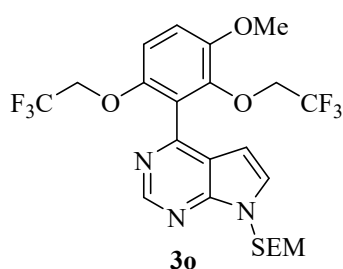

Product **3o** was purified by PE/EtOAc (5/1); brown oil (86 mg, 52% yield). <sup>1</sup>H NMR (400 MHz, CDCl<sub>3</sub>)  $\delta$  8.98 (s, 1H), 7.34 (s, 1H), 7.02 (d,  $J$  = 8.9 Hz, 1H), 6.88 (d,  $J$  = 9.0 Hz, 1H), 6.36 (s, 1H), 5.72 (q,  $J$  = 10.8 Hz, 2H), 4.44-4.18 (m, 4H), 3.91 (s, 3H), 3.52 (t,  $J$  = 8.4 Hz, 2H), 0.93

(t,  $J$  = 8.1 Hz, 2H), -0.06 (s, 9H). <sup>13</sup>C NMR (101 MHz, CDCl<sub>3</sub>)  $\delta$  152.7, 151.6, 151.2, 149.3, 148.5, 145.1, 128.5, 124.4, 122.9 (q,  $J_{C-F}$  = 287.7 Hz), 122.9 (q,  $J_{C-F}$  = 271.6 Hz), 119.1, 113.4, 111.8, 101.6, 72.7, 69.6 (q,  $J_{C-F}$  = 35.2 Hz), 68.2 (q,  $J_{C-F}$  = 35.5 Hz), 66.3, 56.4, 17.6, -1.7. <sup>19</sup>F NMR (377 MHz, CDCl<sub>3</sub>)  $\delta$  -78.90 (s, 3F), -79.82 (s, 3F). HRMS (ESI) calcd for C<sub>23</sub>H<sub>28</sub>F<sub>6</sub>N<sub>3</sub>O<sub>4</sub>Si [M+H]<sup>+</sup>: 552.1748, found: 552.1736.

**4-(5-methoxy-2-(2,2,2-trifluoroethoxy)phenyl)-7-((2-(trimethylsilyl)ethoxy)methyl)-7H-pyrrolo[2,3-d]pyrimidin-5-yl acetate (3p)**

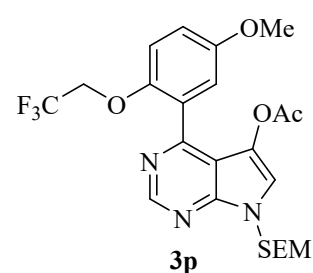

Product **3p** was purified by PE/EtOAc (5/1); yellowish solid (52 mg, 34% yield). mp : 79.5-80.2 °C. <sup>1</sup>H NMR (400 MHz, CDCl<sub>3</sub>)  $\delta$  8.98 (s, 1H), 7.34 (t,  $J$  = 3.3 Hz, 1H), 7.06 (d,  $J$  = 9.0 Hz, 1H), 6.98 (d,  $J$  = 9.0 Hz, 1H), 6.41 (t,  $J$  = 3.3 Hz, 1H), 5.70 (q,  $J$  = 9.5 Hz, 2H), 4.22-4.14 (m, 2H), 3.87 (s,

3H), 3.55 (t,  $J$  = 8.0 Hz, 2H), 1.98 (s, 3H), 0.93 (t,  $J$  = 7.6 Hz, 2H), -0.06 (s, 9H). <sup>13</sup>C NMR (101 MHz, CDCl<sub>3</sub>)  $\delta$  168.3, 152.4, 151.7, 151.4, 149.25, 148.0, 138.7, 128.7, 123.9, 122.3 (q,  $J_{C-F}$  = 279.7 Hz), 118.9, 113.5, 113.2, 101.6, 72.8, 68.2 (q,  $J_{C-F}$  = 35.5 Hz), 66.4, 56.5, 20.3, 17.7, -1.6. <sup>19</sup>F NMR (377 MHz, CDCl<sub>3</sub>)  $\delta$  -74.16 (s, 3F). HRMS

(ESI) calcd for  $C_{23}H_{29}F_3N_3O_5Si$   $[M+H]^+$ : 512.1823, found: 512.1819.

**4-(2-(2,2-difluoroethoxy)phenyl)-7-((2-(trimethylsilyl)ethoxy)methyl)-7H-pyrrolo[2,3-d]pyrimidine (4a)**

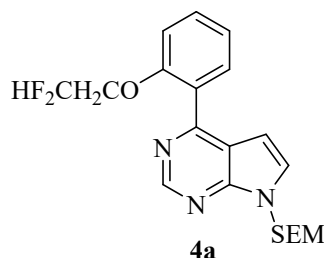

Product **4a** was purified by PE/EtOAc (5/1); yellowish oil (101 mg, 83% yield).  $^1H$  NMR (400 MHz,  $CDCl_3$ )  $\delta$  8.99 (s, 1H), 7.70 (d,  $J = 7.6$  Hz, 1H), 7.50-7.45 (m, 1H), 7.34 (d,  $J = 3.7$  Hz, 1H), 7.24-7.18 (m, 1H), 7.06 (d,  $J = 8.4$  Hz, 1H), 6.54 (d,  $J = 3.7$  Hz, 1H), 6.00-5.71 (m, 1H), 5.70 (s, 2H), 4.23-4.14 (m, 2H), 3.59 (td,  $J = 8.1, 1.0$  Hz, 2H), 0.94 (t,  $J = 8.4$  Hz, 2H), -0.04 (s, 9H).  $^{13}C$  NMR (101 MHz,  $CDCl_3$ )  $\delta$  156.2, 155.2, 151.7 (2C), 131.9, 131.0, 128.1, 128.0, 122.5, 118.0, 113.5 (t,  $J_{C-F} = 242.2$  Hz), 113.3, 102.6, 72.8, 68.3 (t,  $J_{C-F} = 30.2$  Hz), 66.5, 17.7, -1.5.  $^{19}F$  NMR (377 MHz,  $CDCl_3$ )  $\delta$  -124.72 (s, 2F). HRMS (ESI) calcd for  $C_{20}H_{26}F_2N_3O_2Si$   $[M+H]^+$ : 406.1757, found: 406.1740.

**4-(2-(2,2,3,3-tetrafluoropropoxy)phenyl)-7-((2-(trimethylsilyl)ethoxy)methyl)-7H-pyrrolo[2,3-d]pyrimidine (4b)**

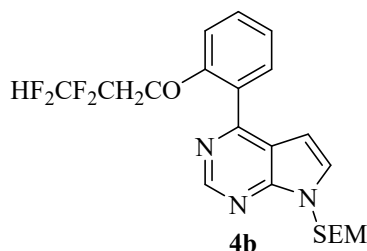

Product **4b** was purified by PE/EtOAc (8/1); yellow oil (105 mg, 77% yield).  $^1H$  NMR (400 MHz,  $CDCl_3$ )  $\delta$  9.00 (s, 1H), 7.70 (dd,  $J = 7.6, 1.8$  Hz, 1H), 7.53-7.49 (m, 1H), 7.39 (d,  $J = 3.7$  Hz, 1H), 7.26 (td,  $J = 7.6, 1.1$  Hz, 1H), 7.08 (dd,  $J = 8.4, 1.0$  Hz, 1H), 6.54 (d,  $J = 3.7$  Hz, 1H), 5.72 (s, 2H), 5.65 (tt,  $J = 53.0, 5.4$  Hz, 1H), 4.35 (tt,  $J = 11.6, 1.6$  Hz, 2H), 3.59 (t,  $J = 8.2$  Hz, 2H), 0.95 (t,  $J = 8.2$  Hz, 2H), -0.03 (s, 9H).  $^{13}C$  NMR (101 MHz,  $CDCl_3$ )  $\delta$  156.1, 154.7, 151.8, 131.9, 131.1, 128.3, 128.1, 123.0, 117.8, 114.3 (tt,  $^1J_{C-F} = 251.2, ^2J_{C-F} = 26.5$  Hz), 113.5, 109.4, 108.7 (tt,  $^1J_{C-F} = 250.6, ^2J_{C-F} = 33.3$  Hz), 102.1, 72.9, 66.6, 66.5 (t,  $J_{C-F} = 31.2$  Hz), 17.7, -1.5.  $^{19}F$  NMR (377 MHz,  $CDCl_3$ )  $\delta$  -125.59 (t,  $J = 5.5$  Hz, 2F), -140.45 (t,  $J = 5.5$  Hz, 2F). HRMS (ESI) calcd for  $C_{21}H_{26}F_4N_3O_2Si$   $[M+H]^+$ : 456.1725, found: 456.1706.

**4-(2-(2,2,3,3,4,4,4-heptafluorobutoxy)phenyl)-7-((2-(trimethylsilyl)ethoxy)methyl)-**

#### 7H-pyrrolo[2,3-d]pyrimidine (4c)

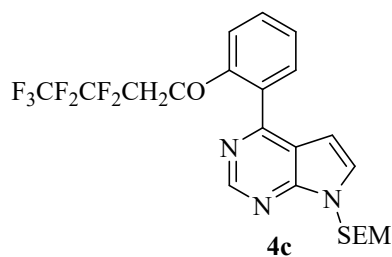

Product **4c** was purified by PE/EtOAc (10/1); yellowish oil (122 mg, 78% yield). <sup>1</sup>H NMR (400 MHz, CDCl<sub>3</sub>) δ 8.99 (s, 1H), 7.69 (dd, *J* = 7.6, 1.8 Hz, 1H), 7.51-7.47 (m, 1H), 7.35 (d, *J* = 3.7 Hz, 1H), 7.26 (td, *J* = 7.5, 1.0 Hz, 1H), 7.10 (d, *J* = 8.2 Hz, 1H), 6.53 (d, *J* = 3.7 Hz, 1H), 5.70 (s, 2H), 4.41 (tt, *J* = 13.3, 1.5 Hz, 2H), 3.57 (t, *J* = 8.2 Hz, 2H), 0.94 (t, *J* = 8.2 Hz, 2H), -0.05 (s, 9H). <sup>13</sup>C NMR (101 MHz, CDCl<sub>3</sub>) δ 155.8, 155.1, 151.7, 151.6, 131.8, 131.0, 128.9, 128.1, 123.4, 119.2-108.4 (m, 3C-F), 118.0, 114.6, 102.3, 72.7, 66.5 (t, *J*<sub>C-F</sub> = 26.8 Hz), 66.4, 17.6, -1.6. <sup>19</sup>F NMR (377 MHz, CDCl<sub>3</sub>) δ -81.05 (t, *J* = 9.2 Hz, 3F), -120.22--120.31 (m, 2F), -127.66 (s, 2F). HRMS (ESI) calcd for C<sub>22</sub>H<sub>25</sub>F<sub>7</sub>N<sub>3</sub>O<sub>2</sub>Si [M+H]<sup>+</sup>: 524.1599, found: 524.1580.

#### 4-(2-((2,2,3,3,4,4,5,5-octafluoropentyl)oxy)phenyl)-7-((2-(trimethylsilyl)ethoxy)methyl)-7H-pyrrolo[2,3-d]pyrimidine (4d)

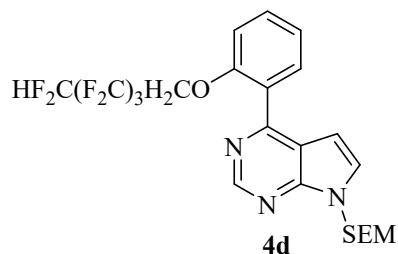

Product **4d** was purified by PE/EtOAc (5/1); yellow oil (133 mg, 80% yield). <sup>1</sup>H NMR (400 MHz, CDCl<sub>3</sub>) δ 8.99 (s, 1H), 7.70 (dd, *J* = 7.6, 1.8 Hz, 1H), 7.52-7.48 (m, 1H), 7.35 (d, *J* = 3.7 Hz, 1H), 7.26 (td, *J* = 7.6, 1.1 Hz, 1H), 7.11 (d, *J* = 8.2 Hz, 1H), 6.54 (d, *J* = 3.7 Hz, 1H), 5.93 (tt, *J* = 51.9, 5.5 Hz, 1H), 5.71 (s, 2H), 4.43 (tt, *J* = 13.5, 1.5 Hz, 2H), 3.58 (t, *J* = 8.1 Hz, 2H), 0.95 (t, *J* = 8.2 Hz, 2H), -0.04 (s, 9H). <sup>13</sup>C NMR (101 MHz, CDCl<sub>3</sub>) δ 155.9, 155.2, 151.7, 151.6, 131.8, 131.0, 128.8, 128.2, 123.4, 118.0, 117.6-104.6 (m, 4C-F), 114.6, 102.3, 72.8, 66.6 (t, *J*<sub>C-F</sub> = 26.4 Hz), 66.4, 17.7, -1.6. <sup>19</sup>F NMR (377 MHz, CDCl<sub>3</sub>) δ -119.49 (td, *J* = 10.4, 2.8 Hz, 2F), -125.59 (t, *J* = 8.4 Hz, 2F), -130.31--130.40 (m, 2F), -137.32--137.42 (m, 2F). HRMS (ESI) calcd for C<sub>23</sub>H<sub>26</sub>F<sub>8</sub>N<sub>3</sub>O<sub>2</sub>Si [M+H]<sup>+</sup>: 556.1661, found: 556.1632.

#### 4-(2-((1,1,1,3,3,3-hexafluoropropan-2-yl)oxy)phenyl)-7-((2-(trimethylsilyl)ethoxy)methyl)-7H-pyrrolo[2,3-d]pyrimidine (4e)

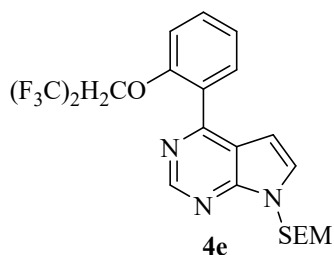

Product **4e** was purified by PE/EtOAc (10/1); yellowish oil (49 mg, 33% yield).  $^1\text{H}$  NMR (400 MHz,  $\text{CDCl}_3$ )  $\delta$  9.00 (s, 1H), 7.76 (d,  $J = 7.6$  Hz, 1H), 7.54 (t,  $J = 7.2$  Hz, 1H), 7.38-7.35 (m, 2H), 7.23 (d,  $J = 8.3$  Hz, 1H), 6.56 (d,  $J = 3.7$  Hz, 1H), 5.72 (s, 2H), 4.94-4.85 (m, 1H), 3.54 (t,  $J = 7.8$  Hz, 2H), 0.93 (t,  $J = 8.3$  Hz, 2H), -0.05 (s, 9H).  $^{13}\text{C}$  NMR (101 MHz,  $\text{CDCl}_3$ )  $\delta$  155.1, 154.7, 151.8, 151.6, 132.1, 131.2, 130.2, 129.5, 128.3, 125.2, 120.8 (q,  $J_{\text{C-F}} = 285.3$  Hz), 118.2, 116.5, 102.4, 72.8, 66.4, 17.7, -1.6.  $^{19}\text{F}$  NMR (377 MHz,  $\text{CDCl}_3$ )  $\delta$  -73.36 (s, 6F). HRMS (ESI) calcd for  $\text{C}_{21}\text{H}_{24}\text{F}_6\text{N}_3\text{O}_2\text{Si}$   $[\text{M}+\text{H}]^+$ : 492.1536, found: 492.1517.

**4-(2-(2,2-difluoroethoxy)-4-methoxyphenyl)-7-((2-(trimethylsilyl)ethoxy)methyl)-7H-pyrrolo[2,3-d]pyrimidine (**4f**)**

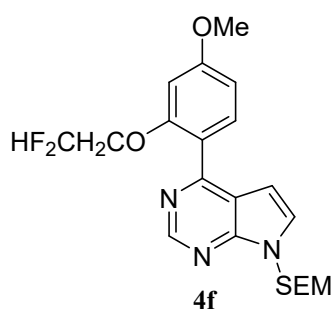

Product **4f** was purified by PE/EtOAc (5/1); yellow oil (103 mg, 79% yield).  $^1\text{H}$  NMR (400 MHz,  $\text{CDCl}_3$ )  $\delta$  8.96 (s, 1H), 7.68 (d,  $J = 8.6$  Hz, 1H), 7.33 (d,  $J = 3.7$  Hz, 1H), 6.75 (dd,  $J = 8.5, 2.3$  Hz, 1H), 6.60 (d,  $J = 2.2$  Hz, 1H), 6.56 (d,  $J = 3.7$  Hz, 1H), 5.88 (tt,  $J = 55.2, 4.1$  Hz, 1H), 5.69 (s, 2H), 4.17 (td,  $J = 13.0, 4.1$  Hz, 2H), 3.89 (s, 3H), 3.59 (t,  $J = 8.2$  Hz, 2H), 0.94 (t,  $J = 8.6$  Hz, 2H), -0.04 (s, 9H).  $^{13}\text{C}$  NMR (101 MHz,  $\text{CDCl}_3$ )  $\delta$  162.2, 156.4, 156.0, 151.7, 151.6, 133.0, 127.7, 120.8, 117.8, 113.4 (t,  $J_{\text{C-F}} = 242.2$  Hz), 106.9, 102.8, 100.6, 72.8, 68.2 (t,  $J_{\text{C-F}} = 30.3$  Hz), 66.5, 55.6, 17.7, -1.5.  $^{19}\text{F}$  NMR (377 MHz,  $\text{CDCl}_3$ )  $\delta$  -124.64 (s, 2F). HRMS (ESI) calcd for  $\text{C}_{21}\text{H}_{28}\text{F}_2\text{N}_3\text{O}_3\text{Si}$   $[\text{M}+\text{H}]^+$ : 436.1863, found: 436.1885.

**4-(4-methoxy-2-(2,2,3,3-tetrafluoropropoxy)phenyl)-7-((2-(trimethylsilyl)ethoxy)methyl)-7H-pyrrolo[2,3-d]pyrimidine (4g)**

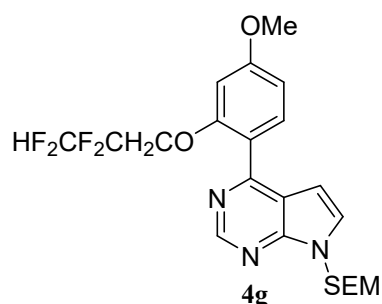

Product **4g** was purified by PE/EtOAc (8/1); yellowish oil (128 mg, 88% yield). <sup>1</sup>H NMR (400 MHz, CDCl<sub>3</sub>) δ 8.97 (s, 1H), 7.67 (d, *J* = 8.6 Hz, 1H), 7.37 (d, *J* = 3.7 Hz, 1H), 6.78 (d, *J* = 8.6 Hz, 1H), 6.61 (s, 1H), 6.55 (d, *J* = 3.6 Hz, 1H), 5.71 (s, 2H), 5.68 (tt, *J* = 53.1, 5.5 Hz, 1H), 4.33 (t, *J* = 11.5 Hz, 2H), 3.91 (s, 3H), 3.58 (t, *J* = 8.2 Hz, 2H), 0.95 (t, *J* = 8.2 Hz, 2H), -0.03 (s, 9H). <sup>13</sup>C NMR (101 MHz, CDCl<sub>3</sub>) δ 162.1, 156.0, 155.9, 151.8, 133.0, 128.0, 120.8, 117.5, 114.3 (tt, <sup>1</sup>*J*<sub>C-F</sub> = 251.4, <sup>2</sup>*J*<sub>C-F</sub> = 26.8 Hz), 108.7 (tt, <sup>1</sup>*J*<sub>C-F</sub> = 250.5, <sup>2</sup>*J*<sub>C-F</sub> = 32.8 Hz), 107.4, 102.3, 101.4, 100.8, 72.8, 66.5, 66.5 (t, *J*<sub>C-F</sub> = 30.9 Hz), 55.6, 17.7, -1.5. <sup>19</sup>F NMR (377 MHz, CDCl<sub>3</sub>) δ -125.49 (t, *J* = 5.7 Hz, 2F), -140.45 (t, *J* = 5.6 Hz, 2F). HRMS (ESI) calcd for C<sub>22</sub>H<sub>28</sub>F<sub>4</sub>N<sub>3</sub>O<sub>3</sub>Si [M+H]<sup>+</sup>: 486.1831, found: 486.1819.

**4-(2-(2,2,3,3,4,4,4-heptafluorobutoxy)-4-methoxyphenyl)-7-((2-(trimethylsilyl)ethoxy)methyl)-7H-pyrrolo[2,3-d]pyrimidine (4h)**

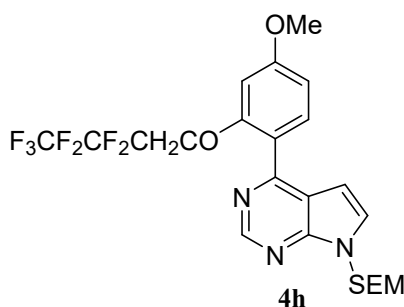

Product **4h** was purified by PE/EtOAc (5/1); yellow oil (126 mg, 76% yield). <sup>1</sup>H NMR (400 MHz, CDCl<sub>3</sub>) δ 8.95 (s, 1H), 7.67 (d, *J* = 8.6 Hz, 1H), 7.33 (d, *J* = 3.7 Hz, 1H), 6.81-6.78 (m, 1H), 6.64 (d, *J* = 2.2 Hz, 1H), 6.55 (d, *J* = 3.7 Hz, 1H), 5.69 (s, 2H), 4.38 (t, *J* = 13.3 Hz, 2H), 3.89 (s, 3H), 3.56 (t, *J* = 8.1 Hz, 2H), 0.93 (t, *J* = 9.2 Hz, 2H), -0.05 (s, 9H). <sup>13</sup>C NMR (101 MHz, CDCl<sub>3</sub>) δ 162.0, 156.3, 155.7, 151.7, 151.6, 132.9, 127.80, 121.5, 119.4-111.5 (m, 3C-F), 117.7, 108.0, 102.5, 101.9, 72.7, 66.5 (t, *J*<sub>C-F</sub> = 26.6 Hz), 66.3, 55.6, 17.6, -1.6. <sup>19</sup>F NMR (377 MHz, CDCl<sub>3</sub>) δ -81.04 (t, *J* = 4.4 Hz, 3F), -120.14--120.22 (m, 2F), -127.62 (s, 2F). HRMS (ESI) calcd for C<sub>23</sub>H<sub>27</sub>F<sub>7</sub>N<sub>3</sub>O<sub>3</sub>Si [M+H]<sup>+</sup>: 554.1704, found: 554.1685.

**4-(4-methoxy-2-((2,2,3,3,4,4,5,5-octafluoropentyl)oxy)phenyl)-7-((2-**



**(trimethylsilyl)ethoxy)methyl)-7*H*-pyrrolo[2,3-*d*]pyrimidine (4*i*)**

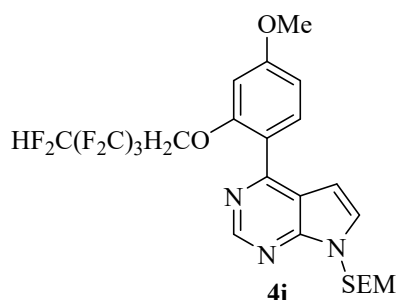

Product **4i** was purified by PE/EtOAc (5/1); yellow oil (147 mg, 84% yield). <sup>1</sup>H NMR (400 MHz, CDCl<sub>3</sub>) δ 8.95 (s, 1H), 7.66 (d, *J* = 8.5 Hz, 1H), 7.32 (d, *J* = 3.7 Hz, 1H), 6.79 (d, *J* = 8.6 Hz, 1H), 6.64 (s, 1H), 6.55 (d, *J* = 3.7 Hz, 1H), 5.93 (tt, *J* = 57.4, 5.5 Hz, 1H), 5.69 (s, 2H), 4.39 (t, *J* = 13.5 Hz,

2H), 3.88 (s, 3H), 3.57 (t, *J* = 8.2 Hz, 2H), 0.93 (t, *J* = 8.2 Hz, 2H), -0.05 (s, 9H). <sup>13</sup>C NMR (101 MHz, CDCl<sub>3</sub>) δ 162.0, 156.3, 155.8, 151.7, 151.6, 132.9, 127.84, 121.5, 117.6, 117.5-104.6 (m, 4C-F), 107.9, 102.5, 101.9, 72.8, 66.6 (t, *J*<sub>C-F</sub> = 26.2 Hz), 66.4, 55.6, 17.6, -1.6. <sup>19</sup>F NMR (377 MHz, CDCl<sub>3</sub>) δ -119.41 (t, *J* = 11.0 Hz, 2F), -125.57 (t, *J* = 8.5 Hz, 2F), -130.32--130.39 (m, 2F), -137.42 (s, 2F). HRMS (ESI) calcd for C<sub>24</sub>H<sub>28</sub>F<sub>8</sub>N<sub>3</sub>O<sub>3</sub>Si [M+H]<sup>+</sup>: 586.1767, found: 586.1740.

**4-(2-(2,2-difluoroethoxy)-5-(trifluoromethyl)phenyl)-7-((2-(trimethylsilyl)ethoxy)methyl)-7*H*-pyrrolo[2,3-*d*]pyrimidine (4*j*)**

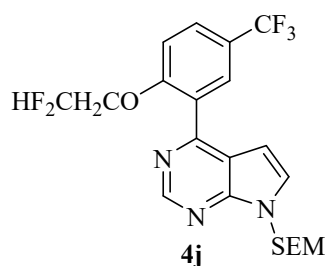

Product **4j** was purified by PE/EtOAc (8/1); yellow oil (86 mg, 61% yield). <sup>1</sup>H NMR (400 MHz, CDCl<sub>3</sub>) δ 9.02 (s, 1H), 8.00 (d, *J* = 2.1 Hz, 1H), 7.76 (ddd, *J* = 8.7, 2.5, 0.8 Hz, 1H), 7.39 (d, *J* = 3.7 Hz, 1H), 7.15 (d, *J* = 8.6 Hz, 1H), 6.51 (d, *J* = 3.7 Hz, 1H), 5.90 (tt, *J* = 55.0, 4.0 Hz, 1H),

5.72 (s, 2H), 4.27 (td, *J* = 12.8, 4.1 Hz, 2H), 3.60 (t, *J* = 8.1 Hz, 2H), 0.95 (t, *J* = 8.2 Hz, 2H), -0.03 (s, 9H). <sup>13</sup>C NMR (101 MHz, CDCl<sub>3</sub>) δ 157.4, 154.5, 151.9, 151.8, 129.4 (q, *J*<sub>C-F</sub> = 3.3 Hz), 128.5, 128.5, 128.1 (q, *J*<sub>C-F</sub> = 3.6 Hz), 124.9 (q, *J*<sub>C-F</sub> = 33.3 Hz), 124.0 (q, *J*<sub>C-F</sub> = 272.7 Hz), 118.0, 113.1 (t, *J*<sub>C-F</sub> = 242.6 Hz), 112.8, 102.1, 72.9, 68.1 (t, *J*<sub>C-F</sub> = 30.6 Hz), 66.6, 17.7, -1.5. <sup>19</sup>F NMR (377 MHz, CDCl<sub>3</sub>) δ -61.77(s, 3F), -124.67(s, 2F). HRMS (ESI) calcd for C<sub>21</sub>H<sub>25</sub>F<sub>5</sub>N<sub>3</sub>O<sub>2</sub>Si [M+H]<sup>+</sup>: 474.1631, found: 474.1622.

**4-(2-(2,2,3,3-tetrafluoropropoxy)-5-(trifluoromethyl)phenyl)-7-((2-**

**(trimethylsilyl)ethoxy)methyl)-7H-pyrrolo[2,3-d]pyrimidine (4k)**

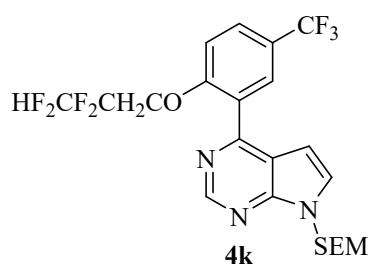

Product **4k** was purified by PE/EtOAc (15/1); yellowish oil (110 mg, 70% yield). <sup>1</sup>H NMR (400 MHz, CDCl<sub>3</sub>) δ 9.02 (s, 1H), 7.99 (d, *J* = 2.4 Hz, 1H), 7.78 (d, *J* = 8.6 Hz, 1H), 7.43 (d, *J* = 3.7 Hz, 1H), 7.16 (d, *J* = 8.7 Hz, 1H), 6.51 (d, *J* = 3.7 Hz, 1H), 5.73 (s, 2H), 5.65 (tt, *J* = 53.0, 5.1 Hz, 1H), 4.42 (tt, *J* = 11.6, 1.5 Hz, 2H), 3.59 (t, *J* = 8.0 Hz, 2H), 0.96 (t, *J* = 8.0 Hz, 2H), -0.03 (s, 9H). <sup>13</sup>C NMR (101 MHz, CDCl<sub>3</sub>) δ 157.0, 154.4, 151.9, 151.8, 129.4 (q, *J*<sub>C-F</sub> = 3.6 Hz), 128.8, 128.5, 128.2 (q, *J*<sub>C-F</sub> = 3.7 Hz), 125.4 (q, *J*<sub>C-F</sub> = 33.5 Hz), 117.7, 115.8, 114.1 (tt, <sup>1</sup>*J*<sub>C-F</sub> = 251.4, <sup>2</sup>*J*<sub>C-F</sub> = 27.0 Hz), 113.1, 108.6 (tt, <sup>1</sup>*J*<sub>C-F</sub> = 250.9, <sup>2</sup>*J*<sub>C-F</sub> = 33.4 Hz), 101.6, 72.9, 66.6, 66.2 (t, *J*<sub>C-F</sub> = 31.0 Hz), 17.7, -1.6. <sup>19</sup>F NMR (377 MHz, CDCl<sub>3</sub>) δ -61.88 (s, 3F), -124.98 (t, *J* = 4.9 Hz, 2F), -139.88 (t, *J* = 4.9 Hz, 2F). HRMS (ESI) calcd for C<sub>22</sub>H<sub>25</sub>F<sub>7</sub>N<sub>3</sub>O<sub>2</sub>Si [M+H]<sup>+</sup>: 524.1599, found: 524.1592.

**4-(2-(2,2-difluoroethoxy)-6-fluorophenyl)-7-((2-(trimethylsilyl)ethoxy)methyl)-7H-pyrrolo[2,3-d]pyrimidine (4l)**

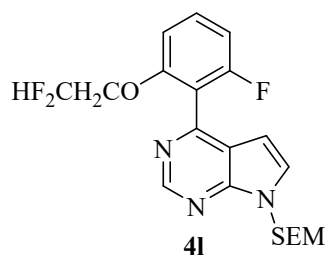

Product **4l** was purified by PE/EtOAc (6/1); yellowish oil (72 mg, 57% yield). <sup>1</sup>H NMR (400 MHz, CDCl<sub>3</sub>) δ 9.01 (s, 1H), 7.46-7.40 (m, 1H), 7.36 (d, *J* = 3.7 Hz, 1H), 6.95 (t, *J* = 8.7 Hz, 1H), 6.86 (d, *J* = 8.4 Hz, 1H), 6.40 (d, *J* = 3.7 Hz, 1H), 5.80 (tt, *J* = 59.2, 4.2 Hz, 1H), 5.70 (s, 2H), 4.17 (td, *J* = 12.9, 4.2 Hz, 2H), 3.60 (t, *J* = 8.1 Hz, 2H), 0.94 (t, *J* = 8.3 Hz, 2H), -0.04 (s, 9H). <sup>13</sup>C NMR (101 MHz, CDCl<sub>3</sub>) δ 160.8 (d, *J*<sub>C-F</sub> = 250.8 Hz), 156.5 (d, *J*<sub>C-F</sub> = 6.6 Hz), 151.7, 151.4, 151.4, 131.1 (d, *J*<sub>C-F</sub> = 10.5 Hz), 128.7, 119.2, 116.3 (d, *J*<sub>C-F</sub> = 17.9 Hz), 113.5 (t, *J*<sub>C-F</sub> = 242.2 Hz), 110.1 (d, *J*<sub>C-F</sub> = 22.4 Hz), 108.8 (d, *J*<sub>C-F</sub> = 3.2 Hz), 101.5, 72.9, 68.6 (t, *J*<sub>C-F</sub> = 30.4 Hz), 66.6, 17.7, -1.5. <sup>19</sup>F NMR (377 MHz, CDCl<sub>3</sub>) δ -73.36 (s, 1F), -124.82--125.46 (m, 2F). HRMS (ESI) calcd for C<sub>20</sub>H<sub>25</sub>F<sub>3</sub>N<sub>3</sub>O<sub>2</sub>Si [M+H]<sup>+</sup>: 424.1663, found: 424.1648.

**4-(2-fluoro-6-(2,2,3,3-tetrafluoropropoxy)phenyl)-7-((2-(trimethylsilyl)ethoxy)methyl)-7H-pyrrolo[2,3-d]pyrimidine (4m)**

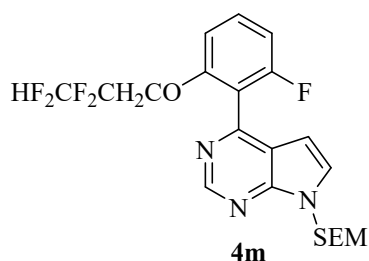

Product **4m** was purified by PE/EtOAc (6/1); yellowish oil (79 mg, 56% yield). <sup>1</sup>H NMR (400 MHz, CDCl<sub>3</sub>) δ 9.01 (s, 1H), 7.49-7.43 (m, 1H), 7.39 (d, *J* = 3.7 Hz, 1H), 6.99 (td, *J* = 9.1, 0.9 Hz, 1H), 6.87 (d, *J* = 8.4 Hz, 1H), 6.41 (dd, *J* = 3.7, 1.3 Hz, 1H), 5.72 (s, 2H), 5.59 (tt, *J* = 53.0, 6.4 Hz, 1H), 4.33 (tt, *J* = 11.5, 1.6 Hz, 2H), 3.59 (t, *J* = 8.1 Hz, 2H), 0.95 (t, *J* = 8.2 Hz, 2H), -0.04 (s, 9H). <sup>13</sup>C NMR (101 MHz, CDCl<sub>3</sub>) δ 160.8 (d, *J*<sub>C-F</sub> = 251.4 Hz), 155.9 (d, *J*<sub>C-F</sub> = 6.8 Hz), 151.8, 151.5, 151.2, 131.3 (d, *J*<sub>C-F</sub> = 10.5 Hz), 128.9, 119.0, 116.4 (d, *J*<sub>C-F</sub> = 18.3 Hz), 114.1 (tt, <sup>1</sup>*J*<sub>C-F</sub> = 251.4, <sup>2</sup>*J*<sub>C-F</sub> = 26.8 Hz), 110.6 (d, *J*<sub>C-F</sub> = 22.5 Hz), 108.8 (d, *J*<sub>C-F</sub> = 3.2 Hz), 108.6 (tt, <sup>1</sup>*J*<sub>C-F</sub> = 250.8, <sup>2</sup>*J*<sub>C-F</sub> = 29.5 Hz), 101.3 (d, *J*<sub>C-F</sub> = 1.7 Hz), 72.8, 66.6, 66.6 (t, *J*<sub>C-F</sub> = 31.2 Hz), 17.7, -1.6. <sup>19</sup>F NMR (377 MHz, CDCl<sub>3</sub>) δ -112.53 (s, 1F), -125.69 (d, *J* = 160.0 Hz, 2F), -140.38 (d, *J* = 187.2 Hz, 2F). HRMS (ESI) calcd for C<sub>20</sub>H<sub>25</sub>F<sub>3</sub>N<sub>3</sub>O<sub>2</sub>Si [M+H]<sup>+</sup>: 474.1631, found: 474.1612.

**4-(2-methoxyphenyl)-7-((2-(trimethylsilyl)ethoxy)methyl)-7H-pyrrolo[2,3-d]pyrimidine (5)**

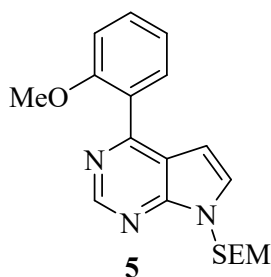

Product **5** was purified by PE/EtOAc (4/1); colorless oil (96 mg, 90% yield). <sup>1</sup>H NMR (500 MHz, CDCl<sub>3</sub>) δ 9.01 (s, 1H), 7.65 (dd, *J* = 7.6, 1.8 Hz, 1H), 7.50-7.46 (m, 1H), 7.33 (d, *J* = 3.7 Hz, 1H), 7.13 (td, *J* = 7.5, 1.1 Hz, 1H), 7.07 (d, *J* = 1.0 Hz, 1H), 6.52 (d, *J* = 3.7 Hz, 1H), 5.69 (s, 2H), 3.84 (s, 3H), 3.60 (t, *J* = 8.2 Hz, 2H), 0.94 (t, *J* = 8.3 Hz, 2H), -0.03 (s, 9H). <sup>13</sup>C NMR (101 MHz, CDCl<sub>3</sub>) δ 157.04, 156.99, 151.74, 131.56, 130.99, 127.87, 127.05, 120.91, 118.04, 111.39, 102.72, 72.85, 66.58, 55.48, 29.72, 17.78, -1.40. HRMS (ESI) calcd for C<sub>19</sub>H<sub>26</sub>N<sub>3</sub>O<sub>2</sub>Si [M+H]<sup>+</sup>: 356.1789, found: 356.1781.

## 6. $^1\text{H}$ , $^{13}\text{C}$ , $^{19}\text{F}$ NMR Spectra for the compounds

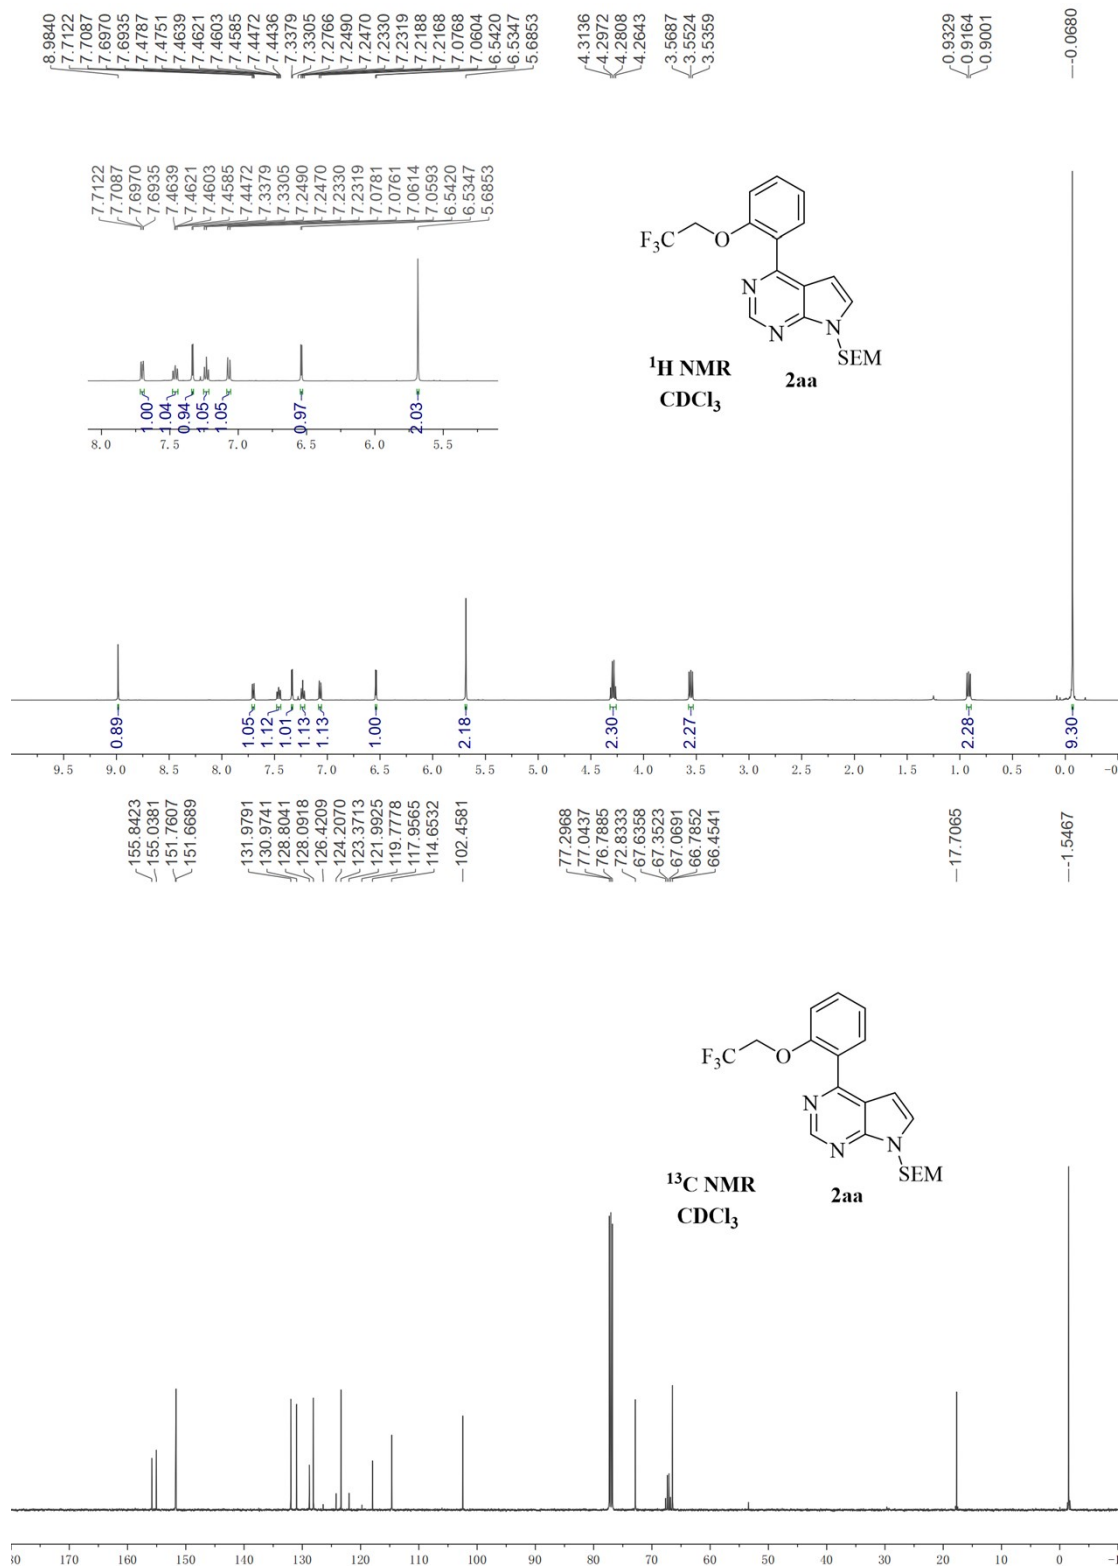

---73.6712

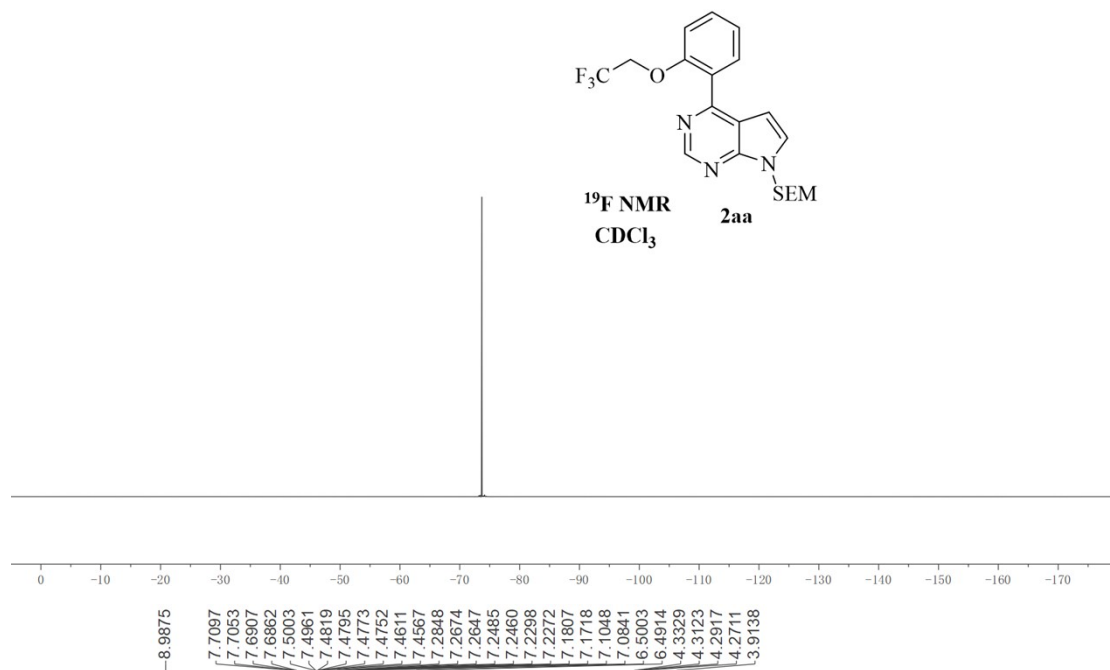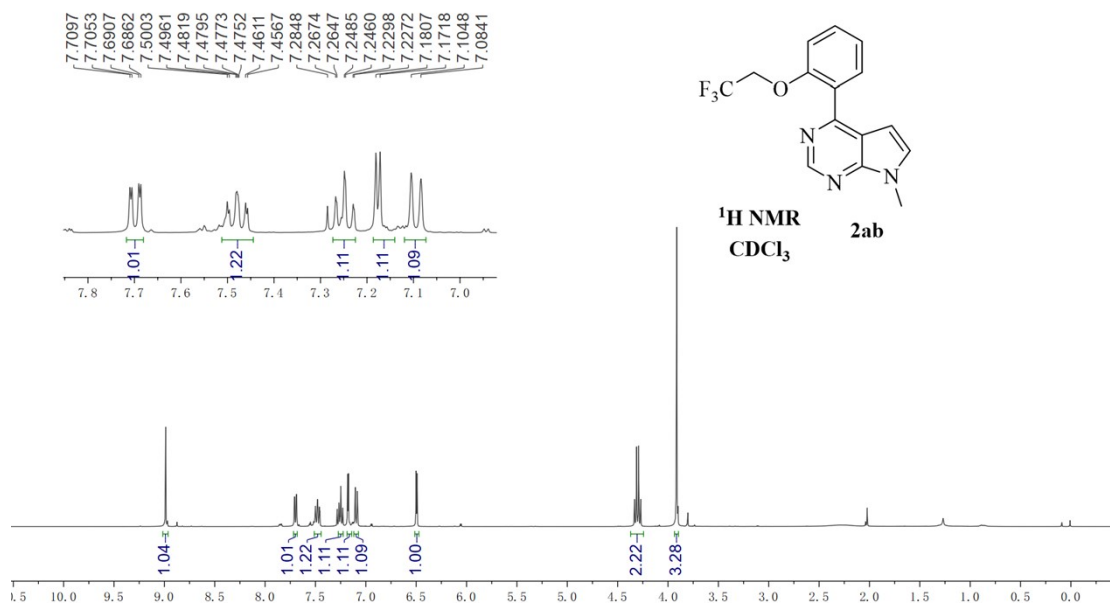

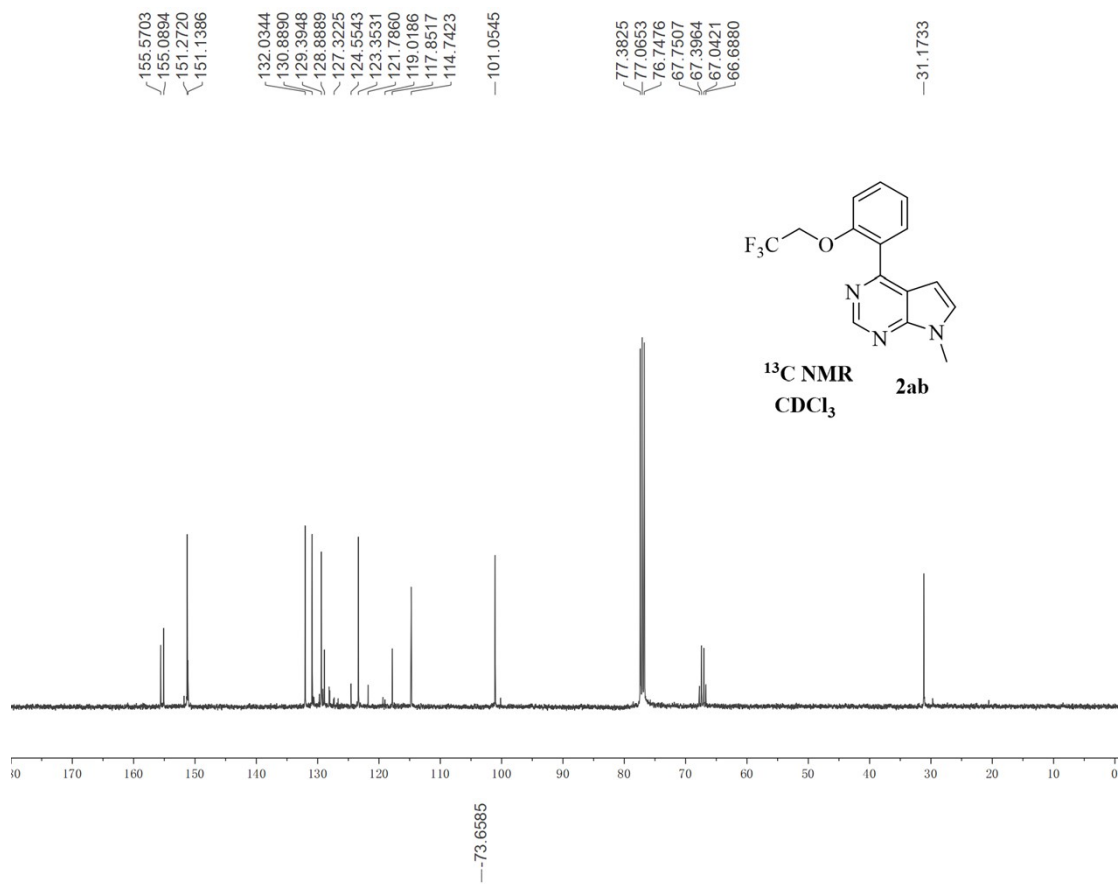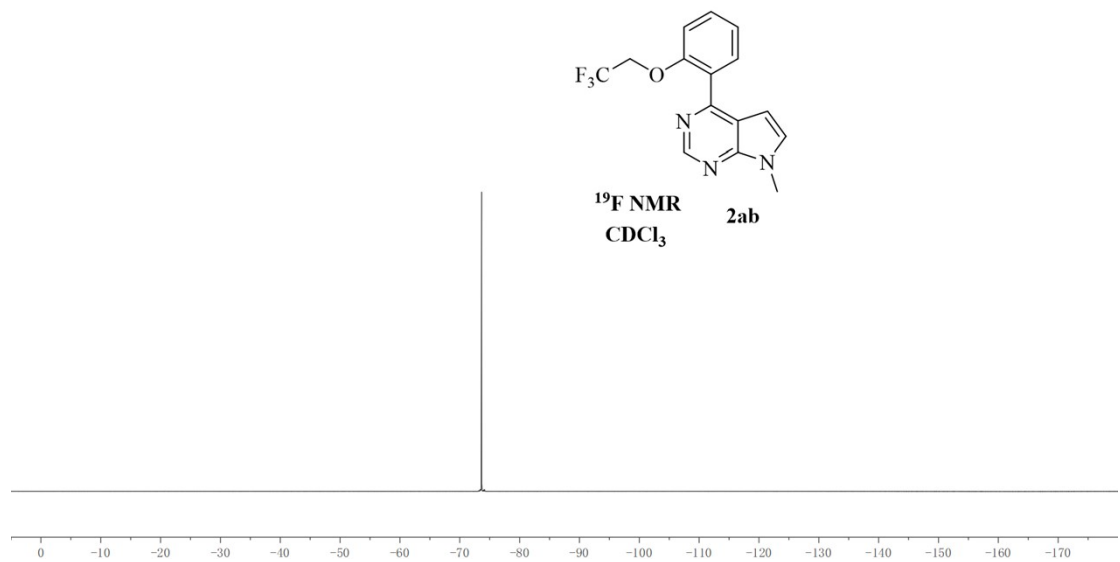



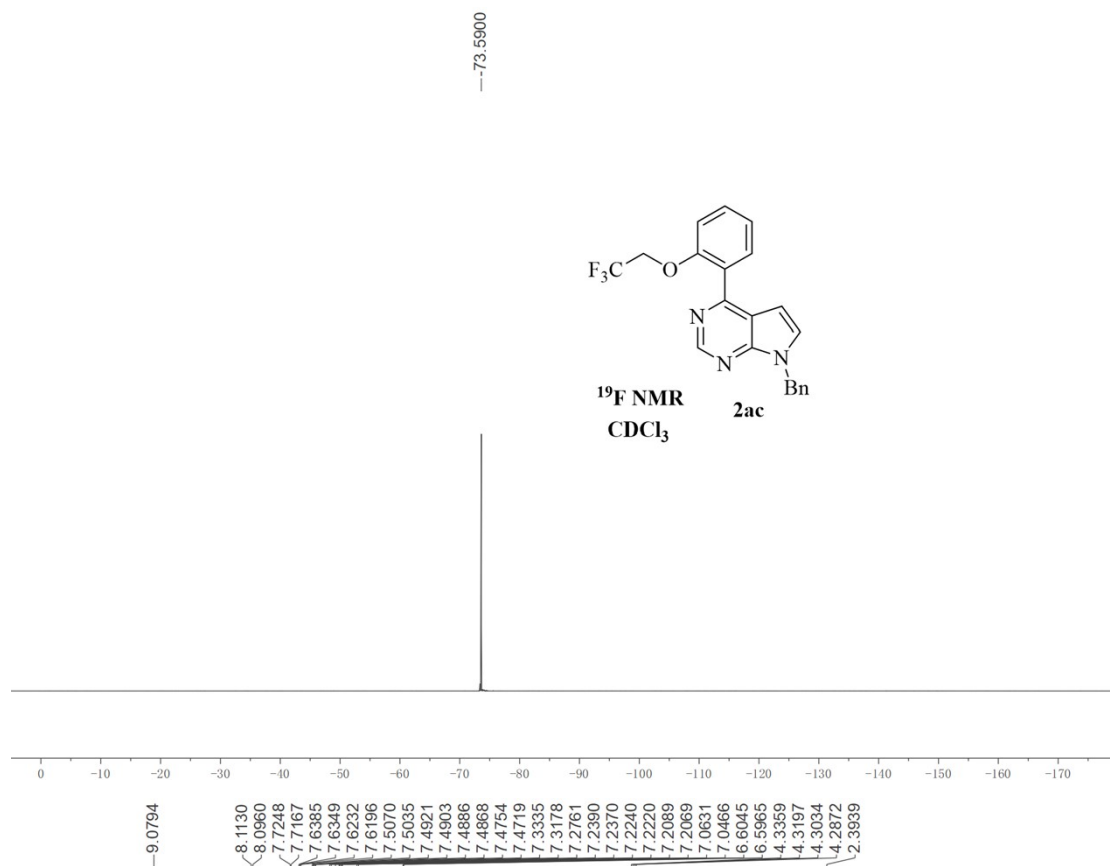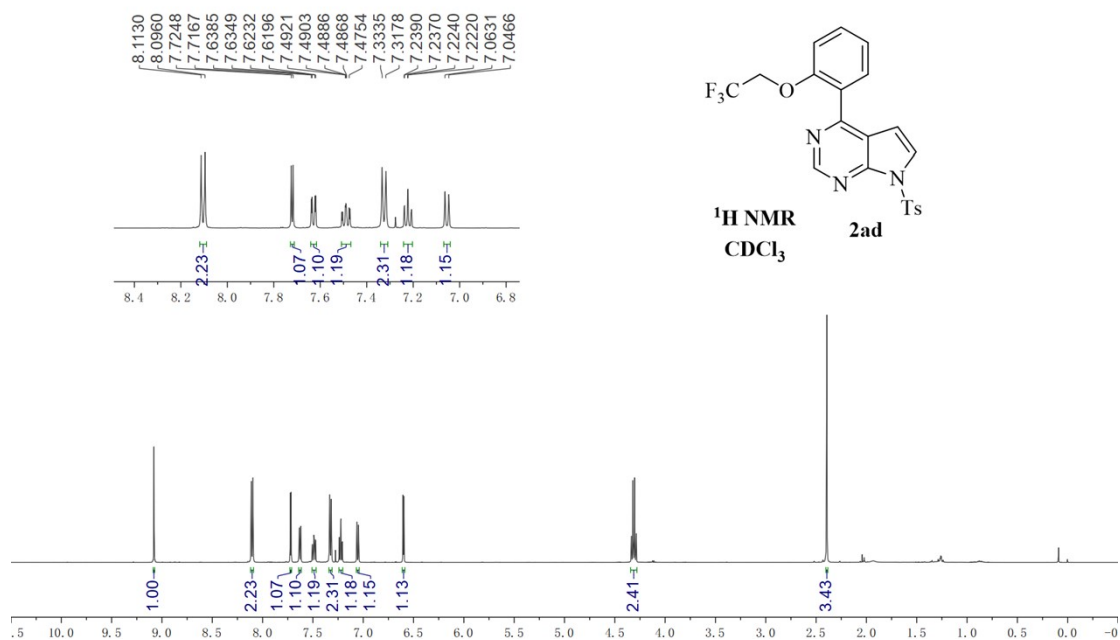



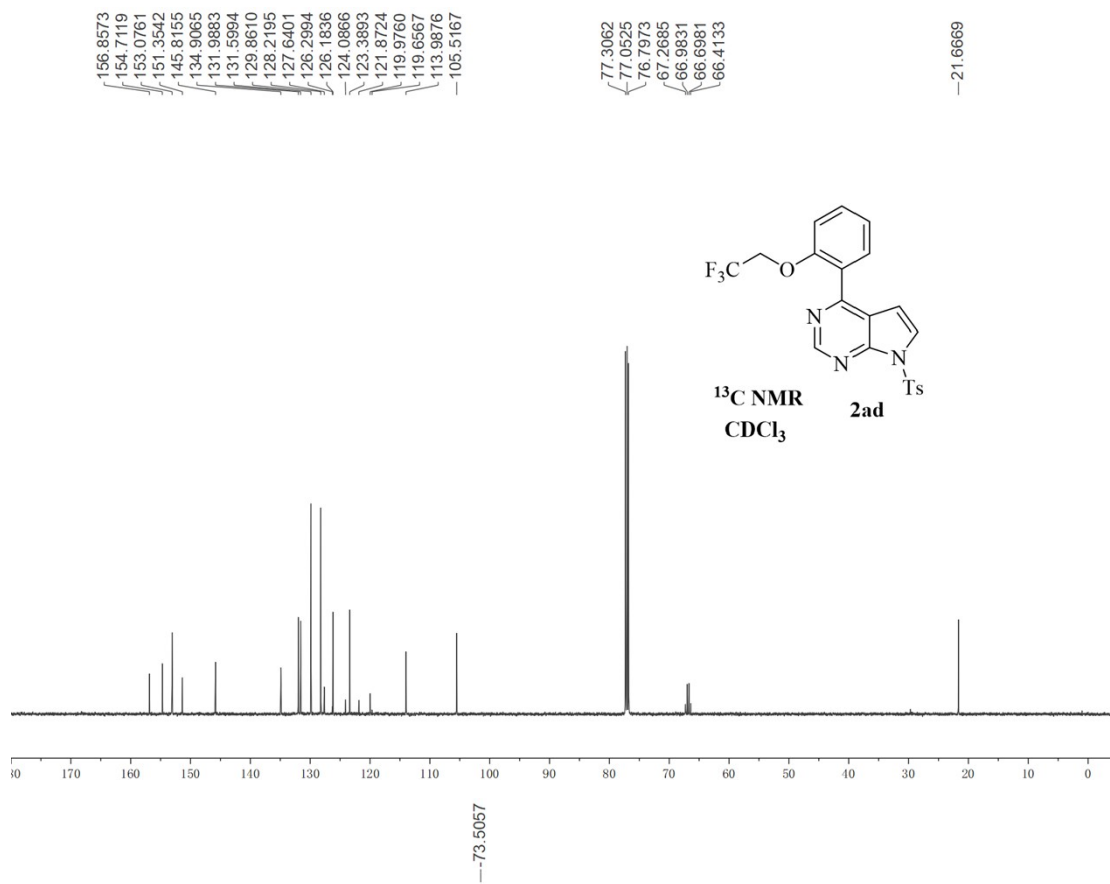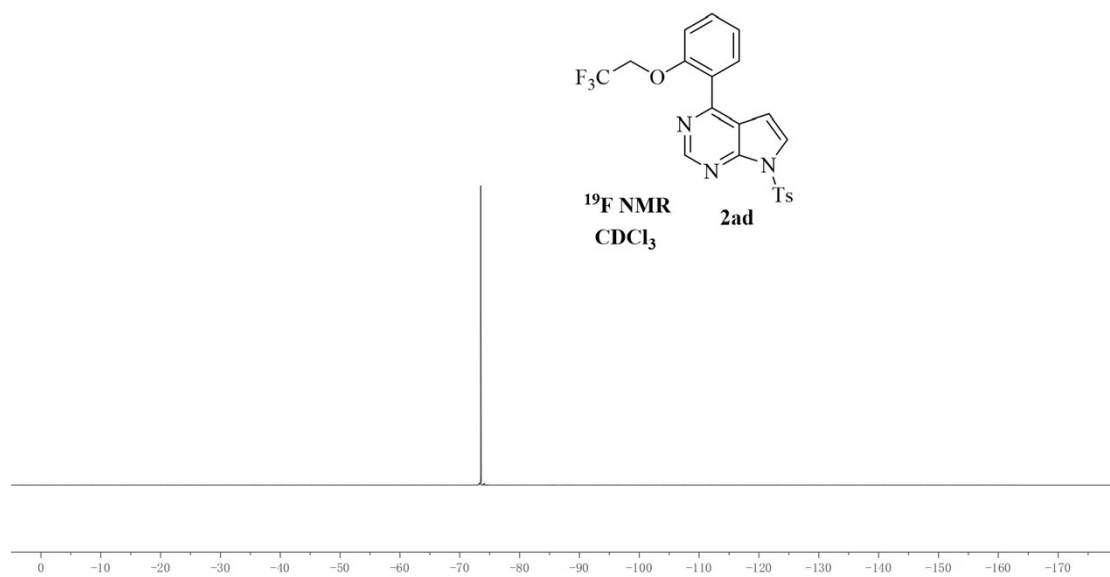

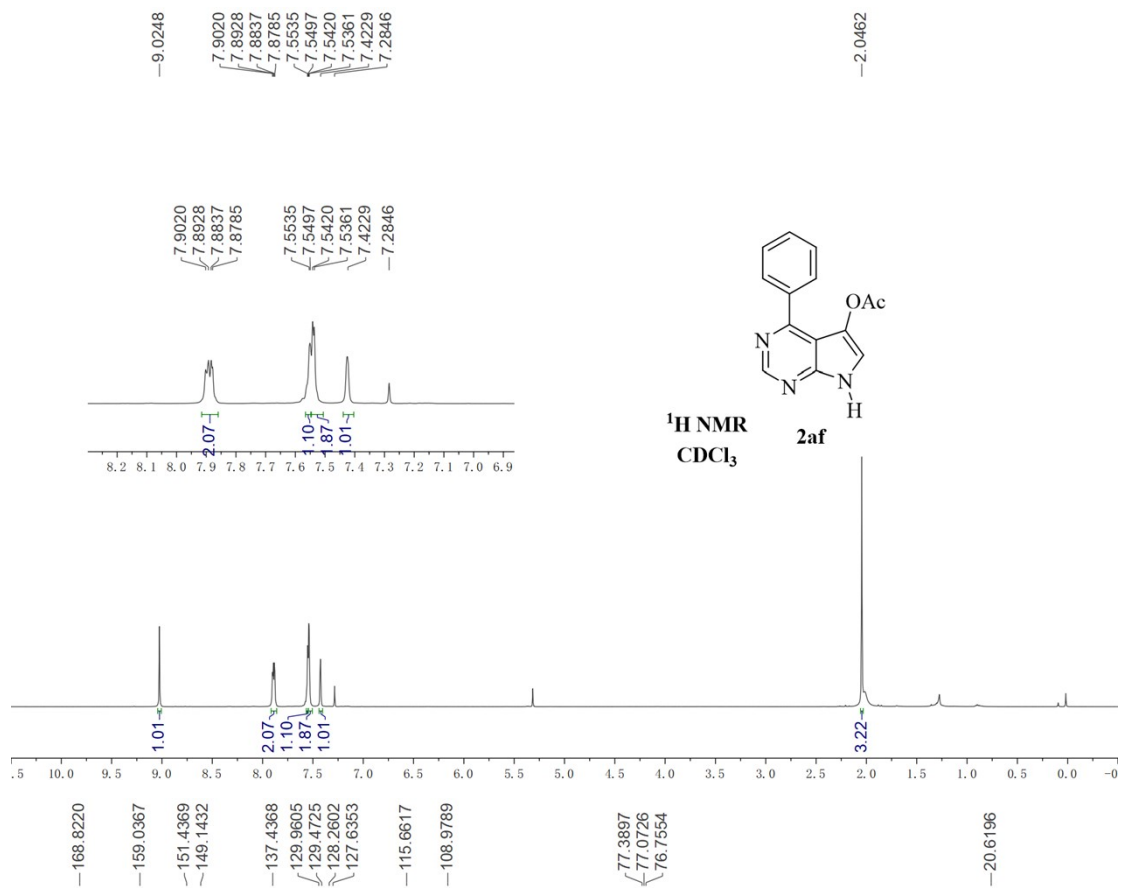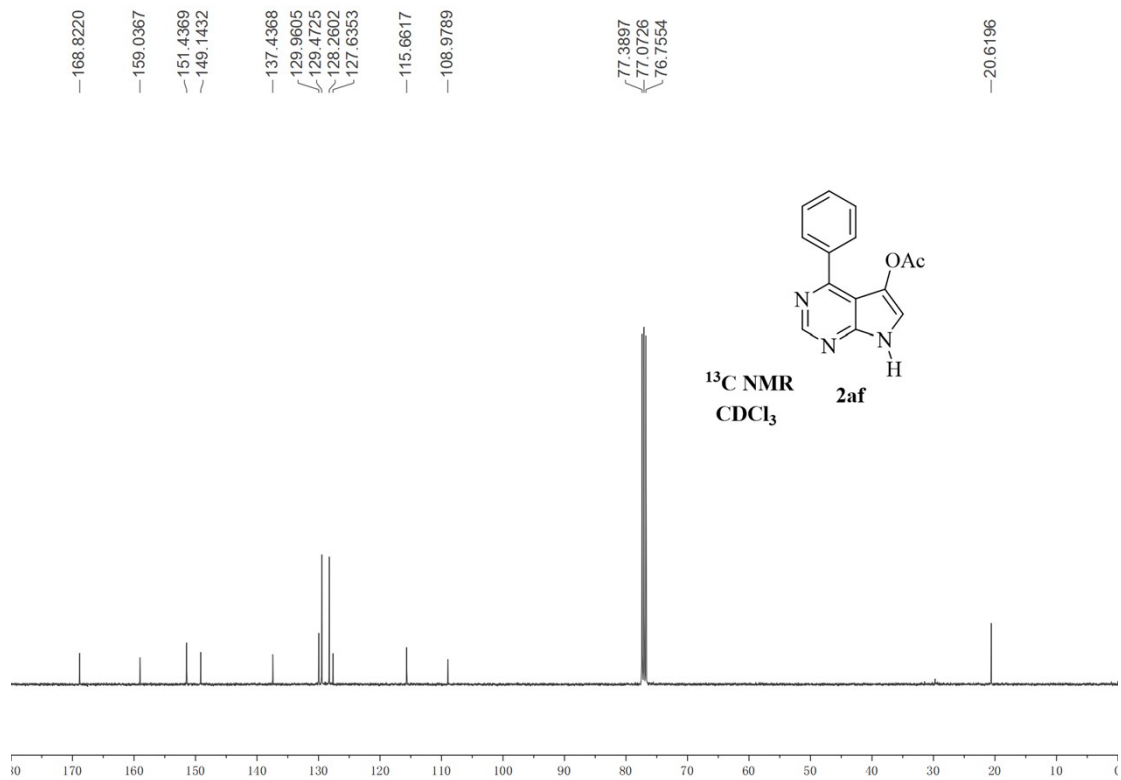

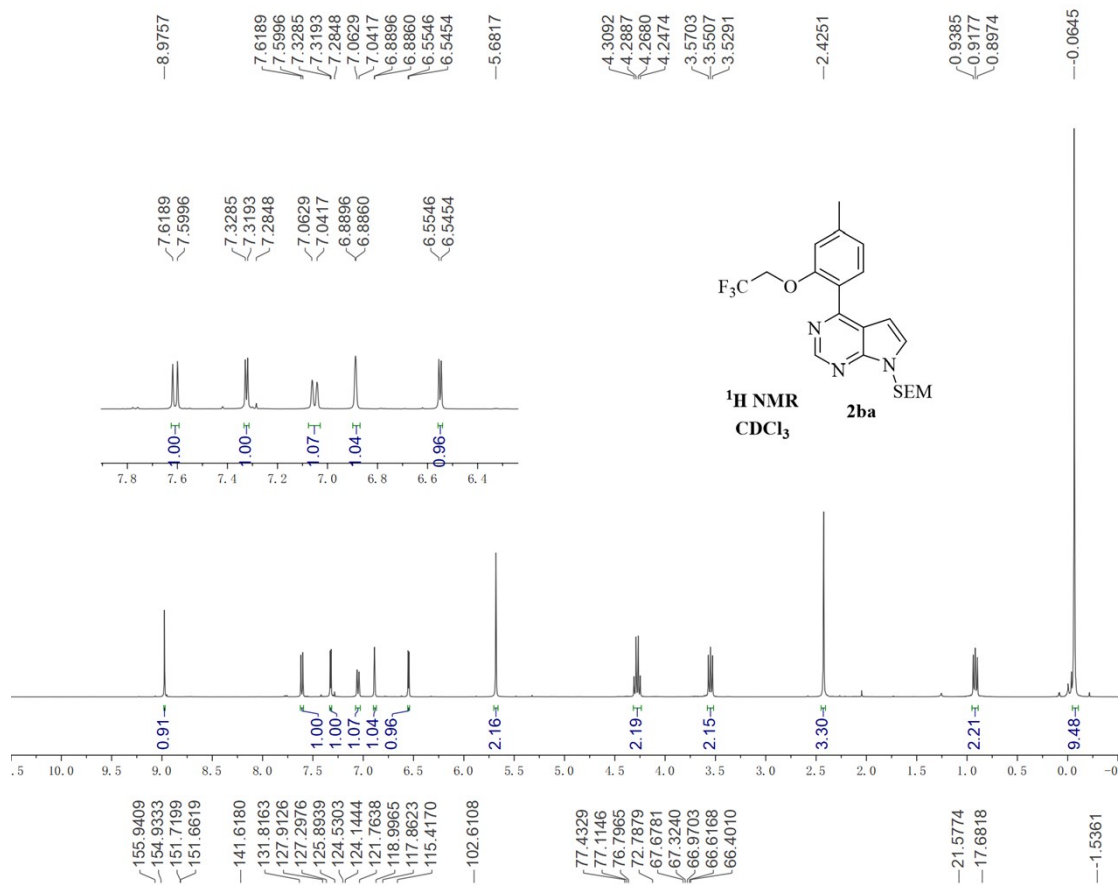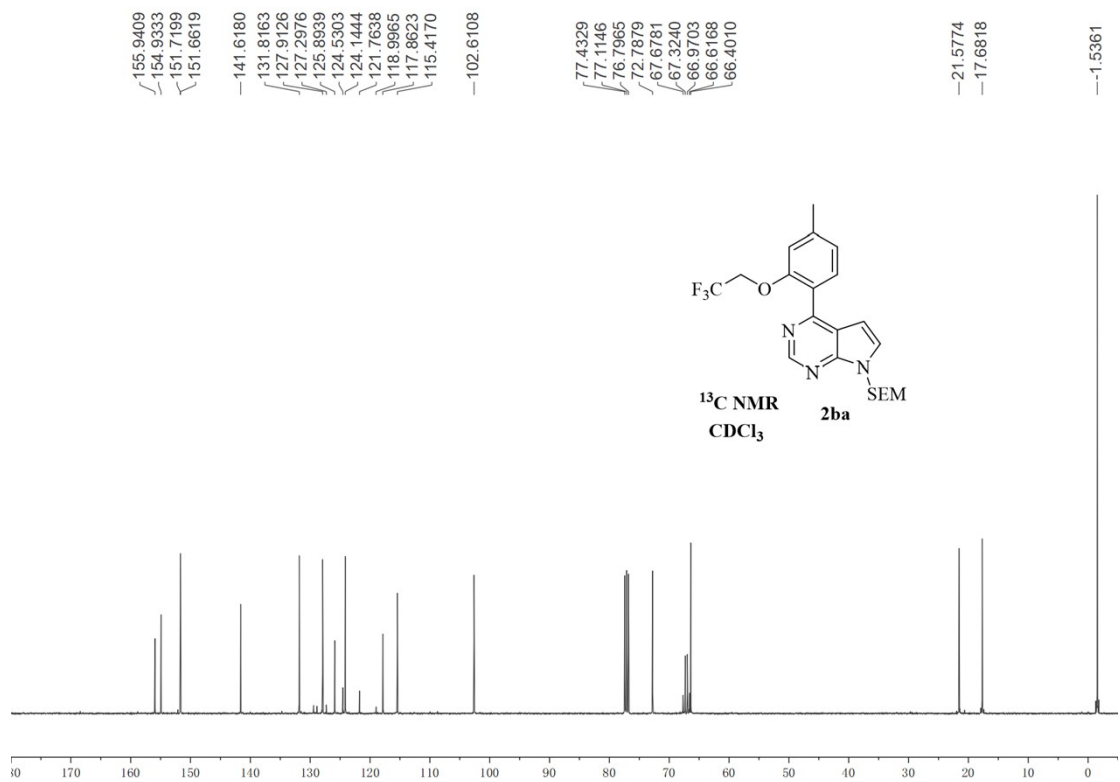

—73.7001

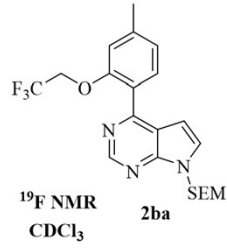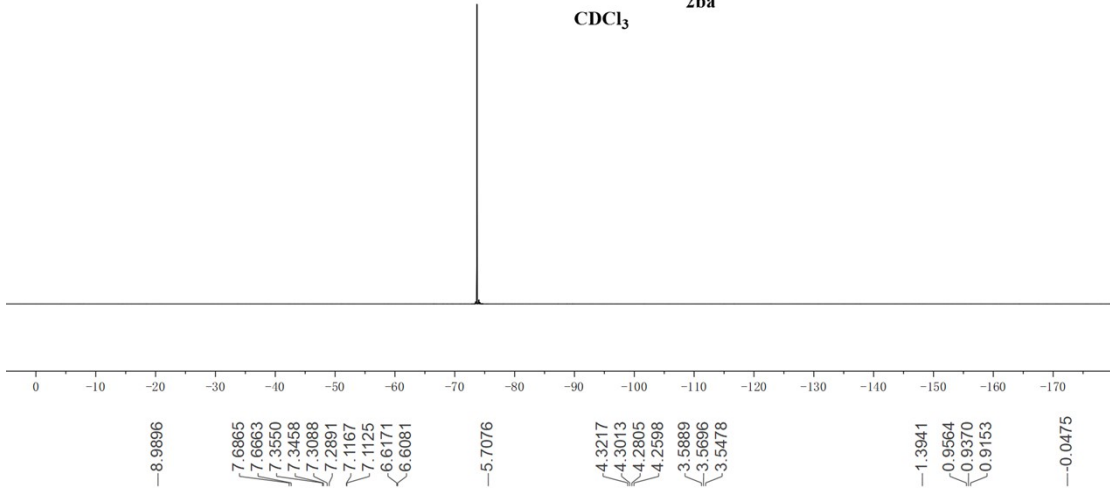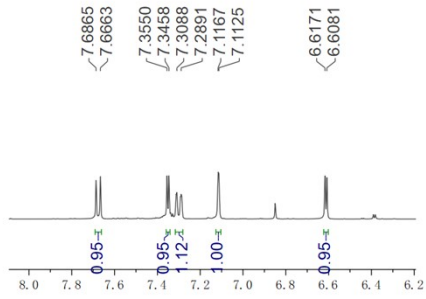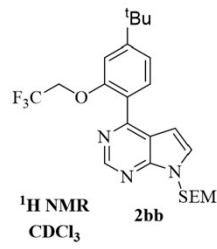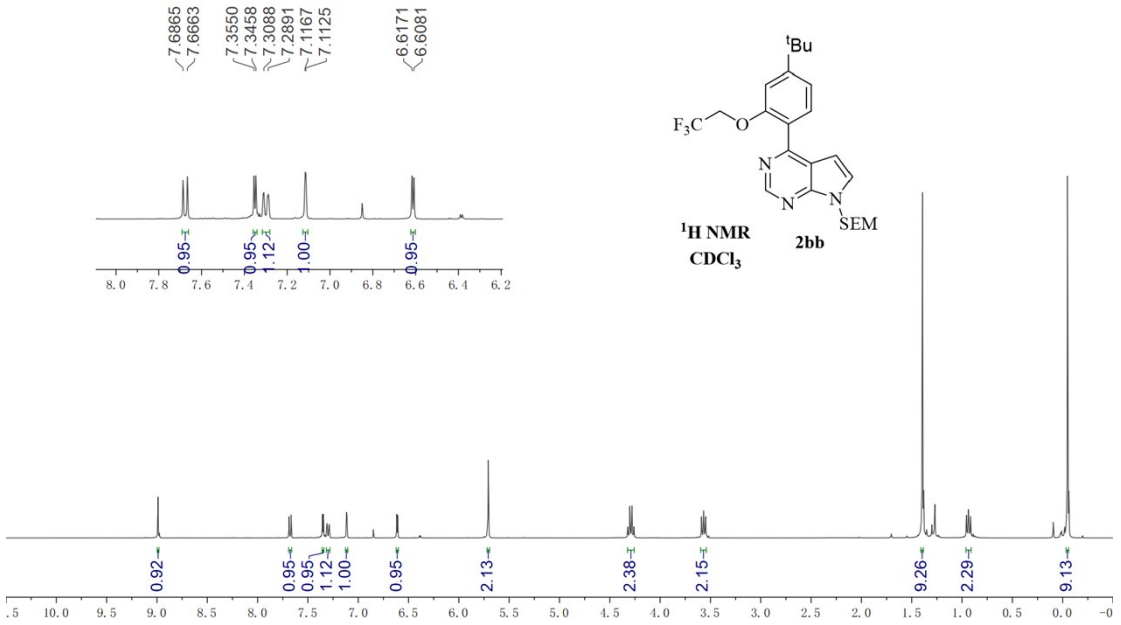

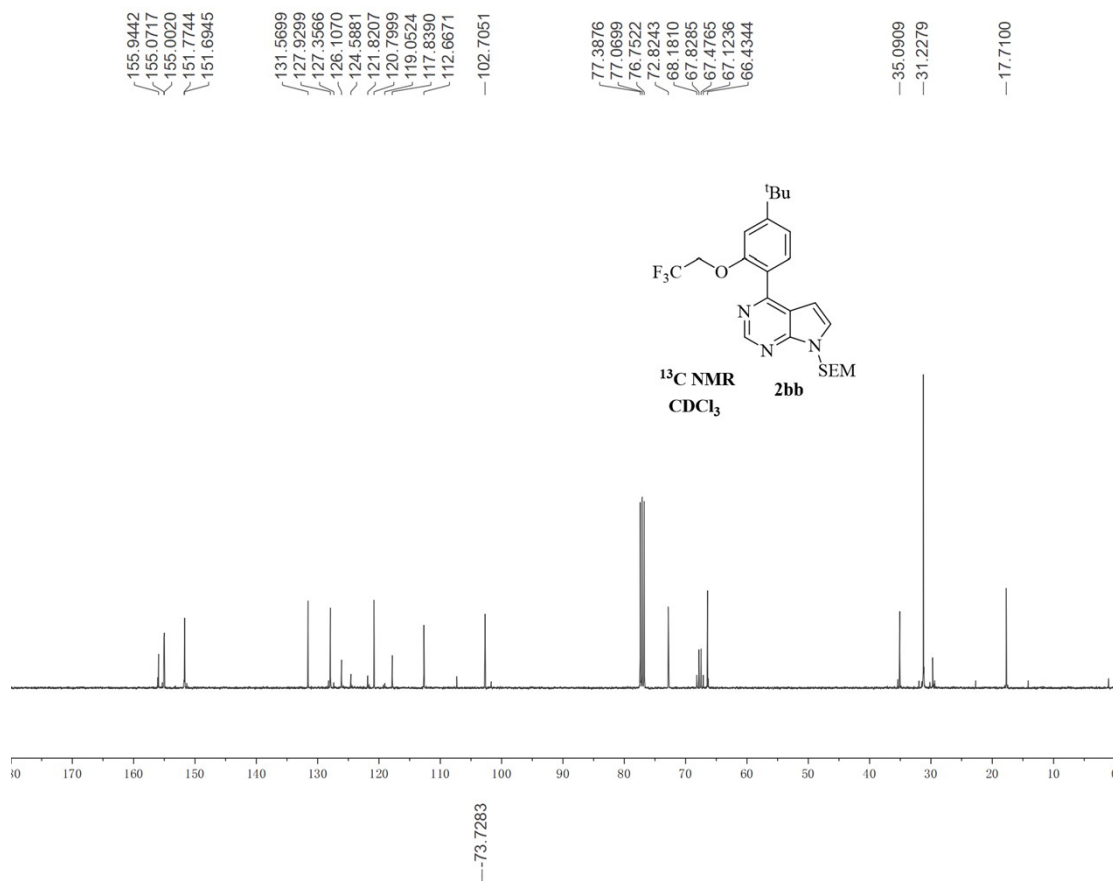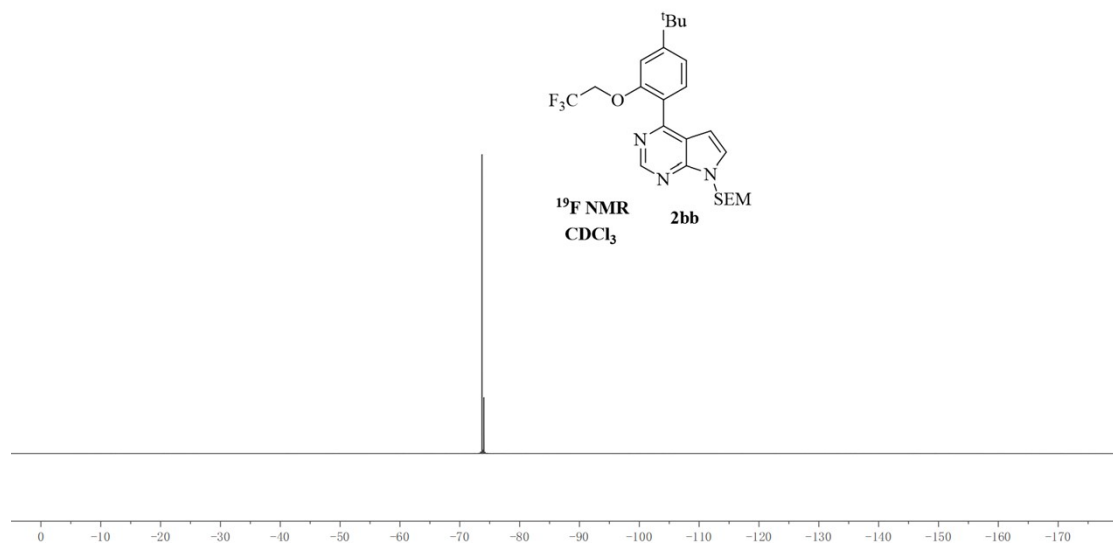



—73.5662

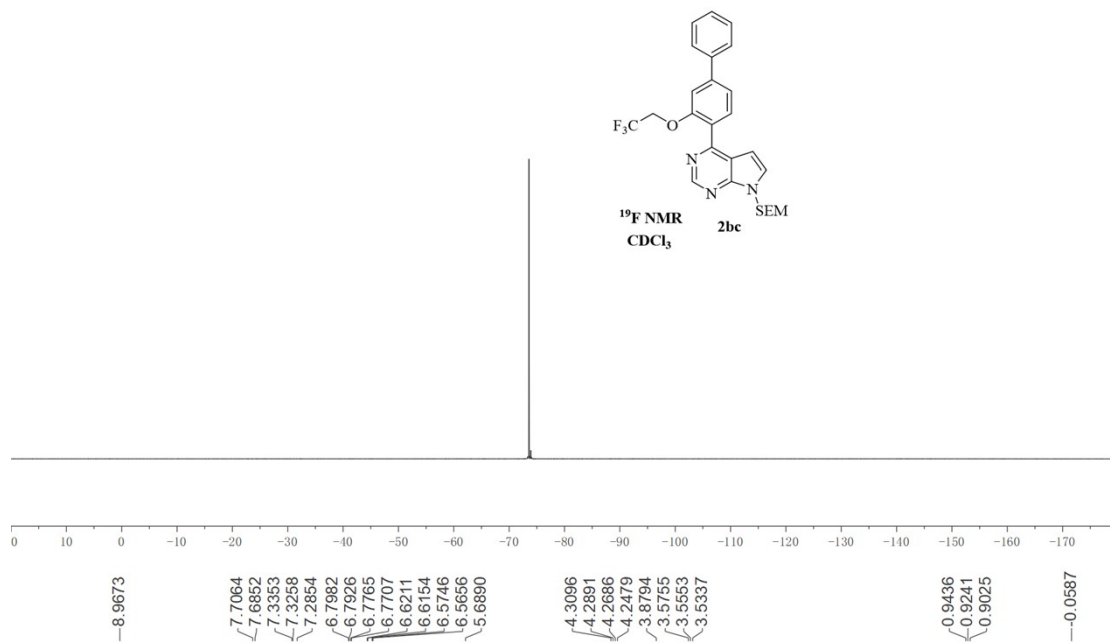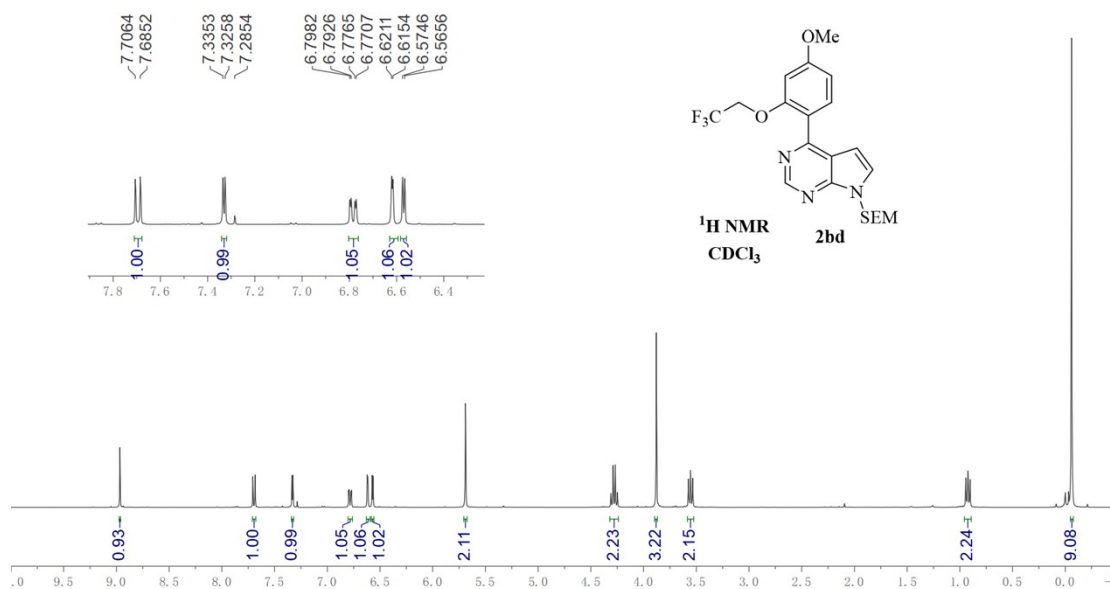

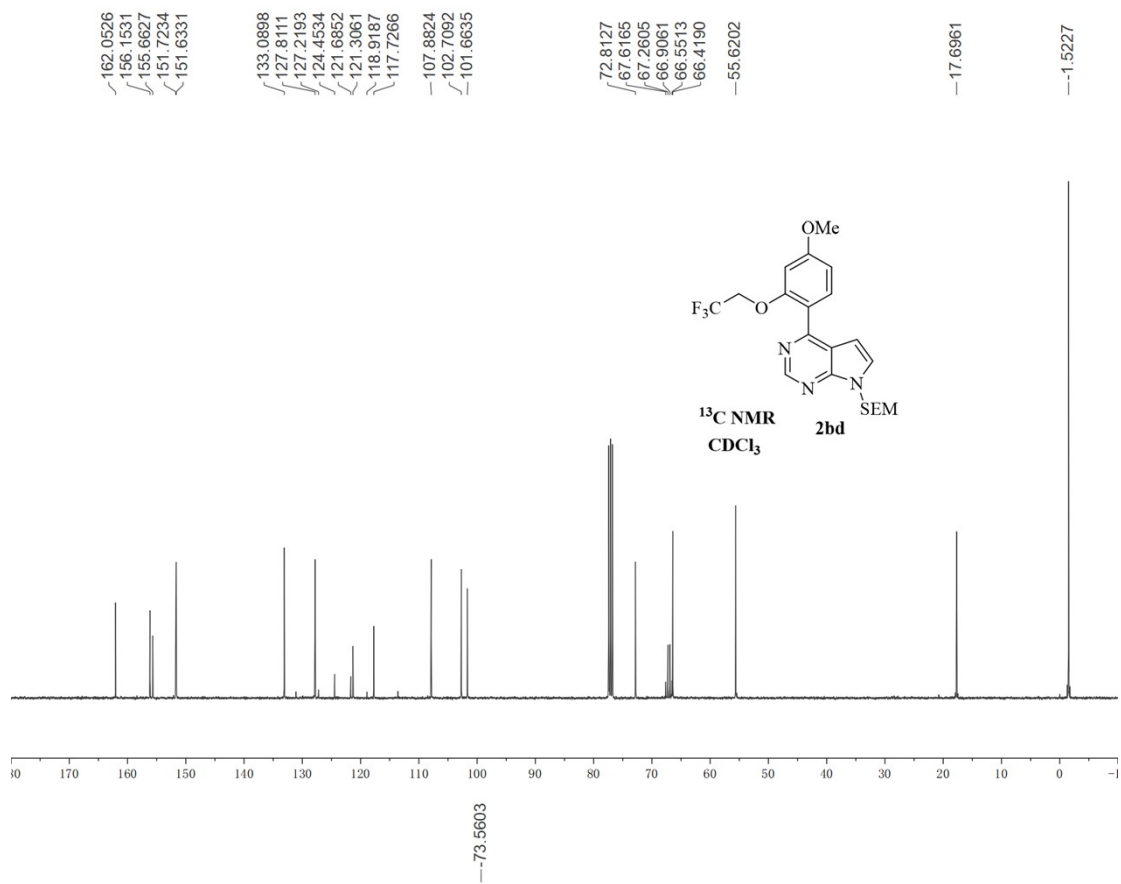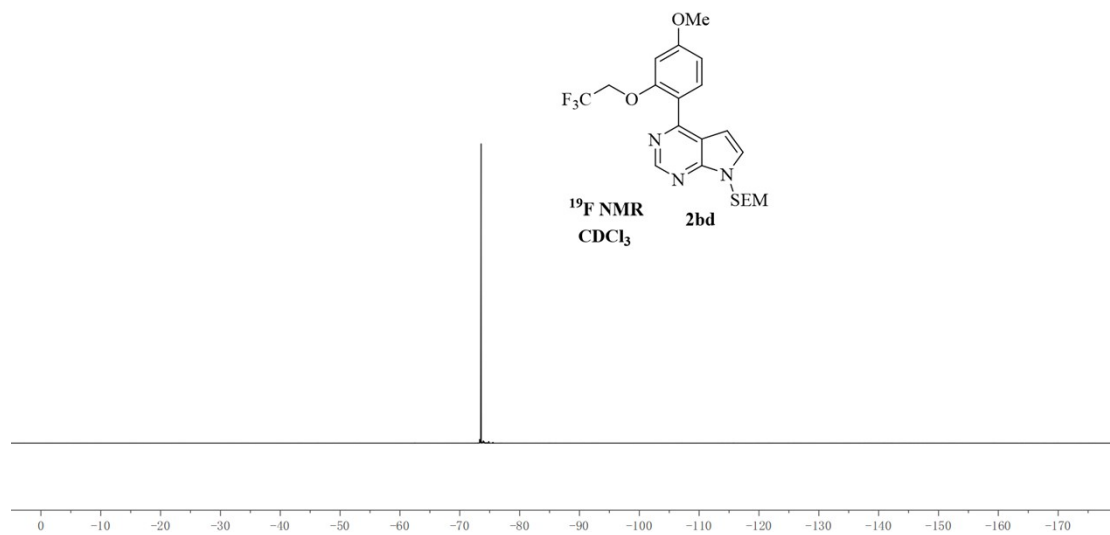



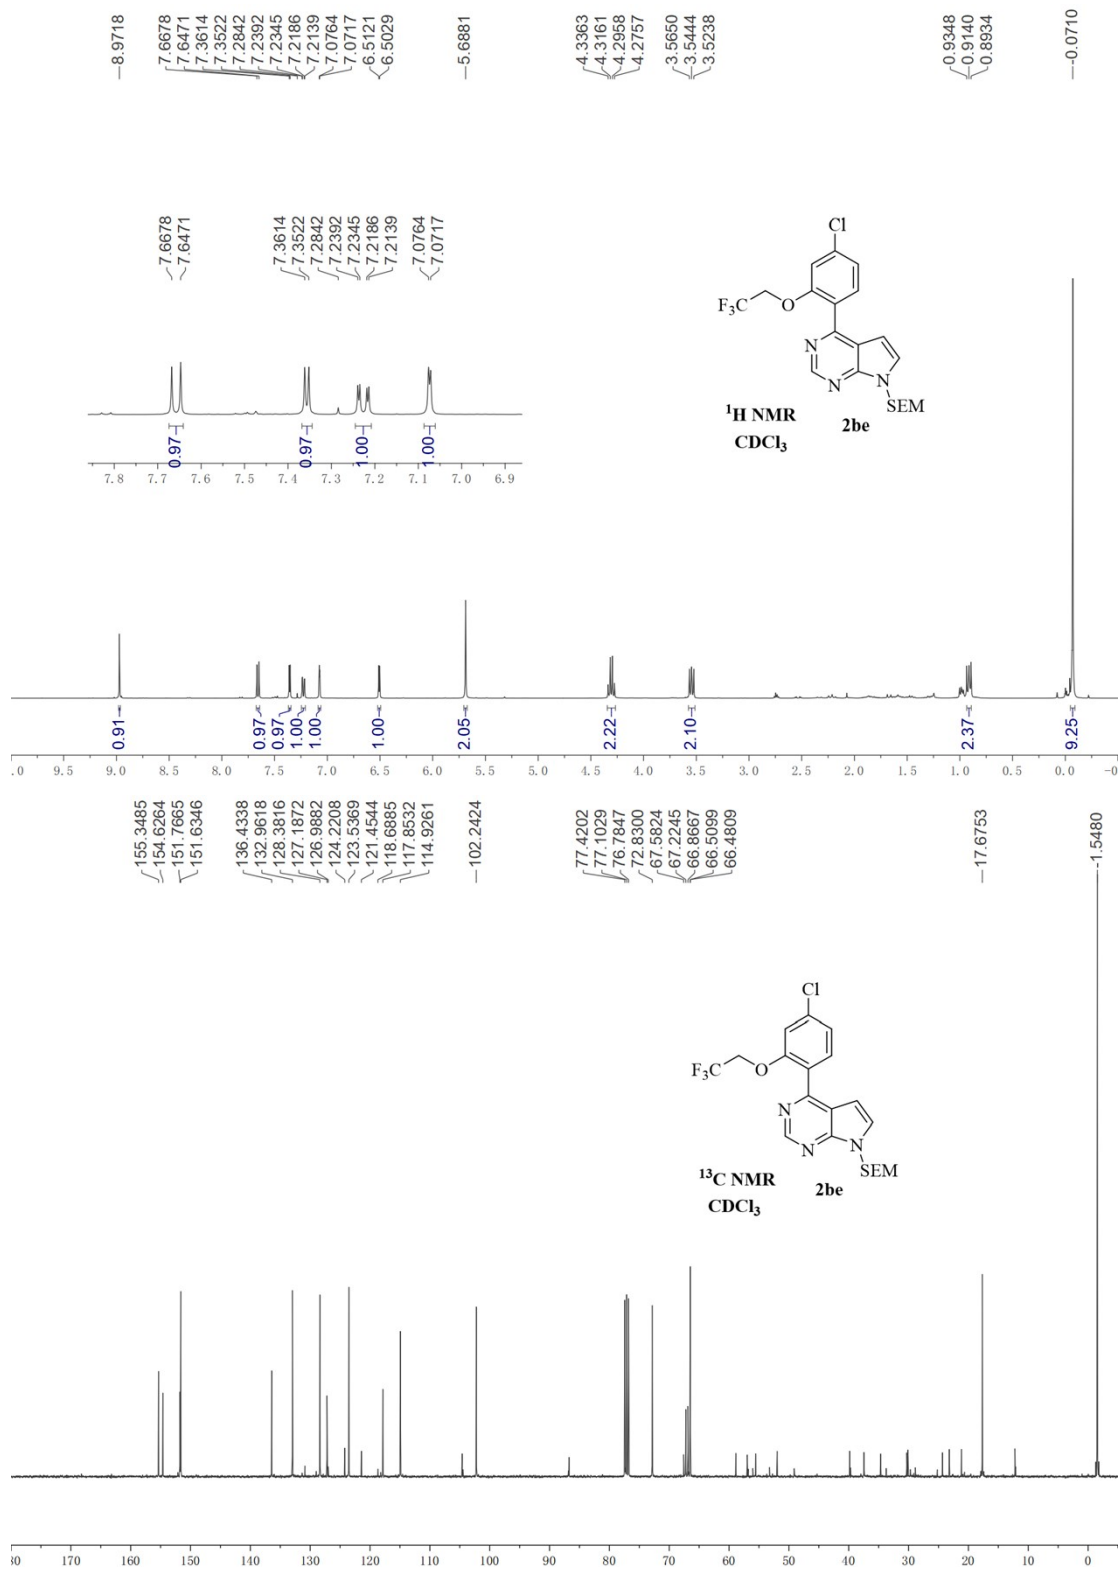

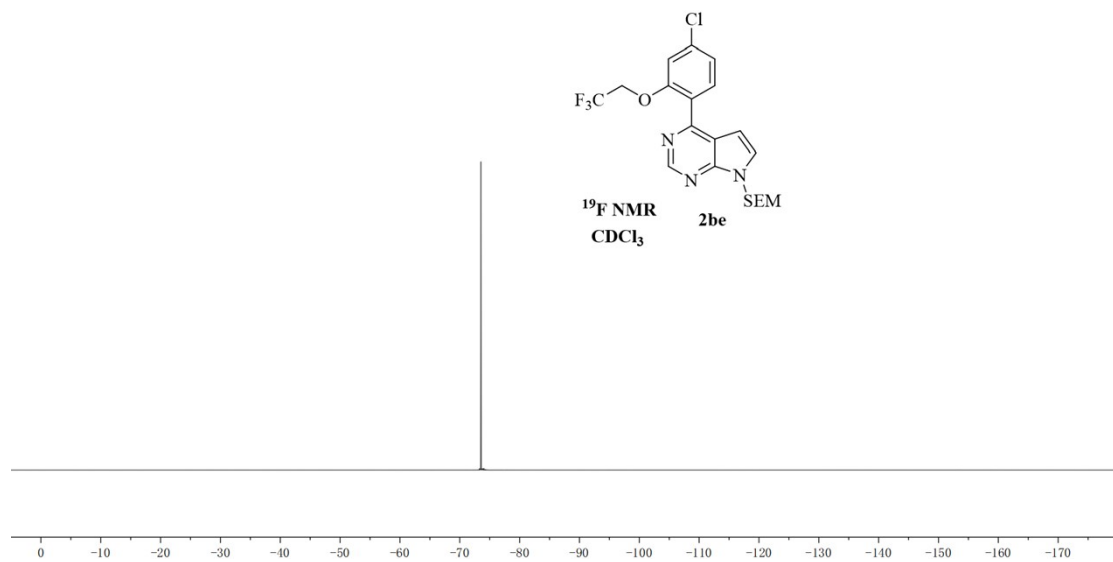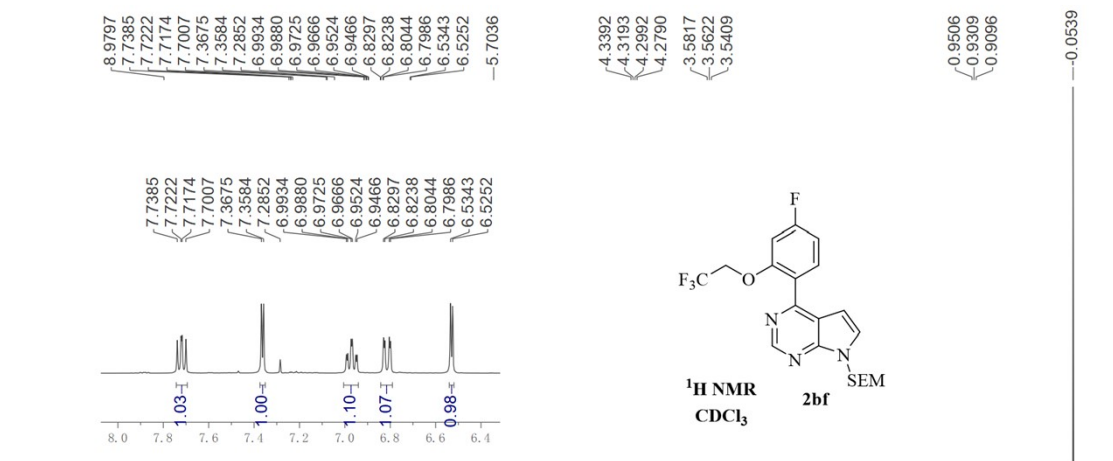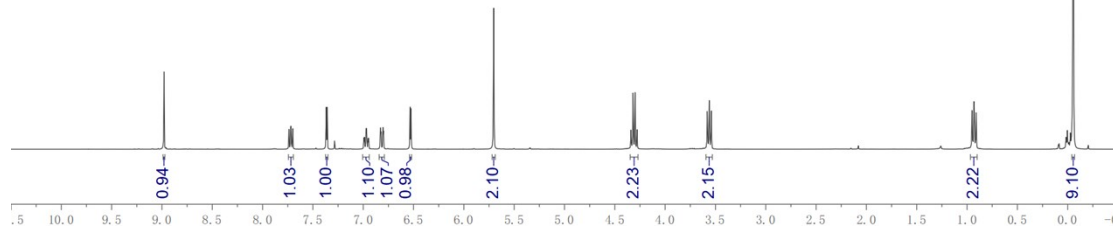

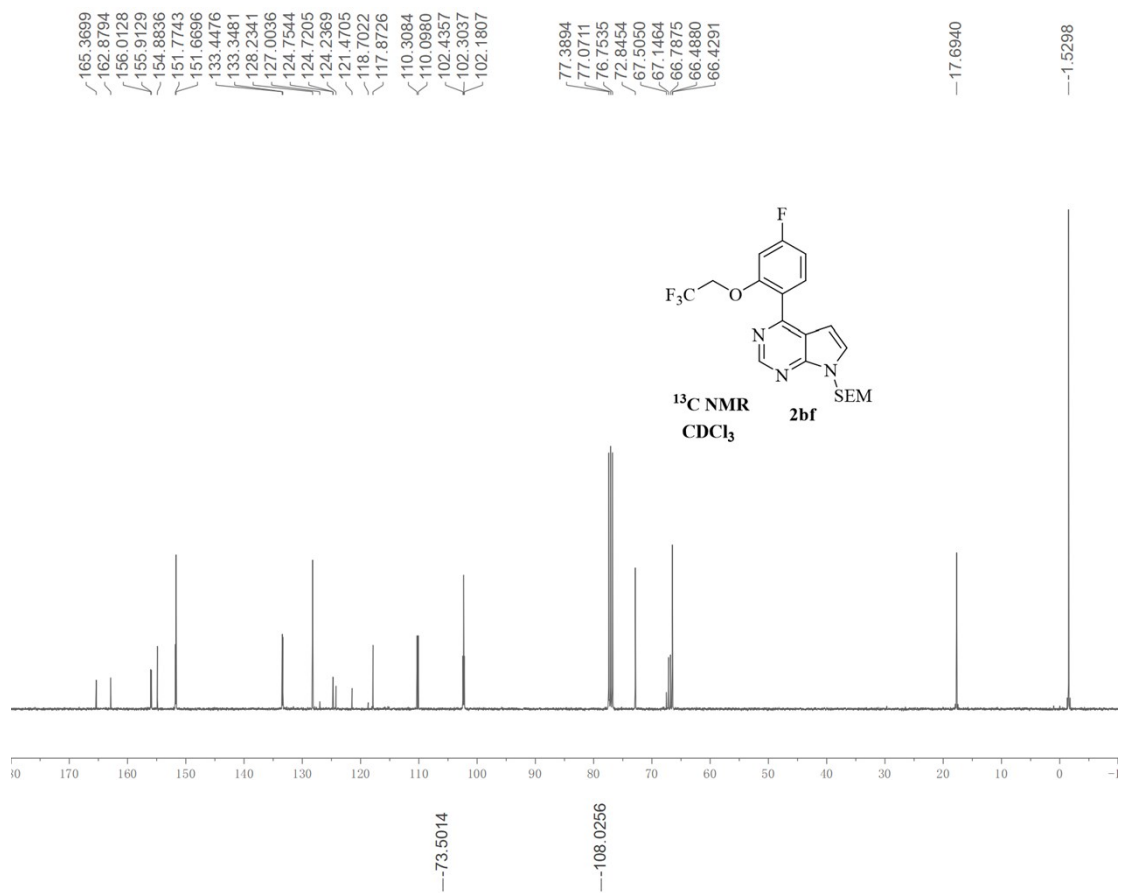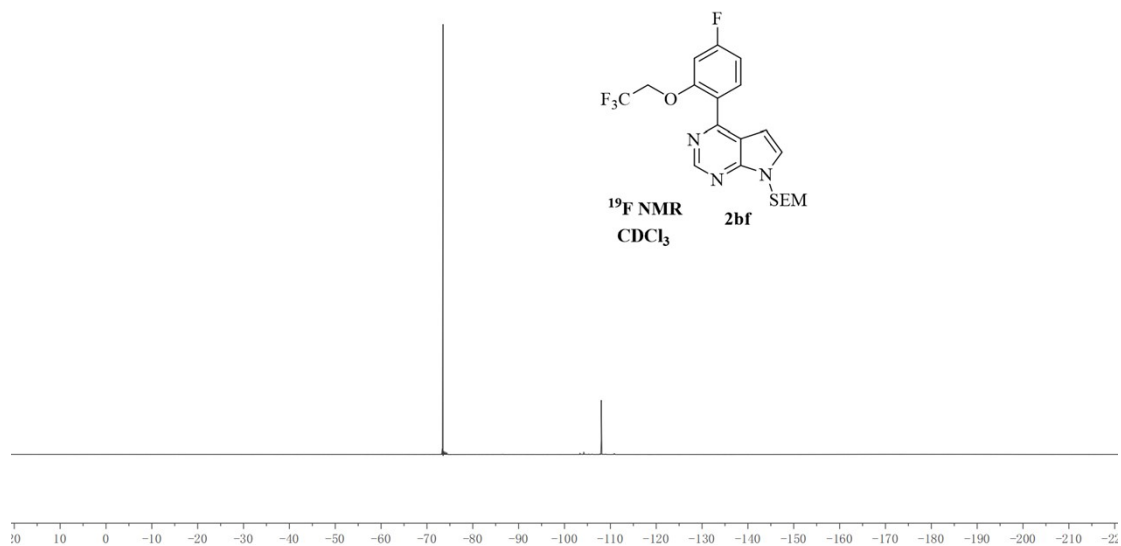

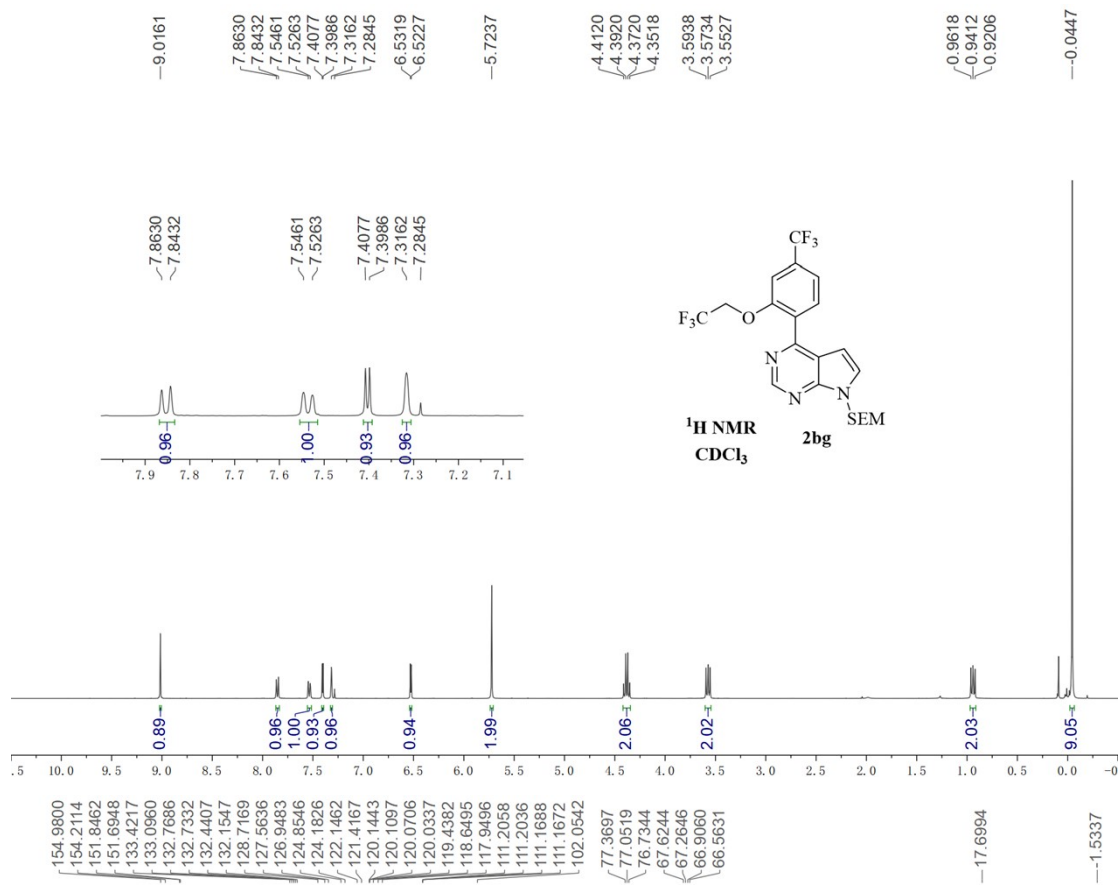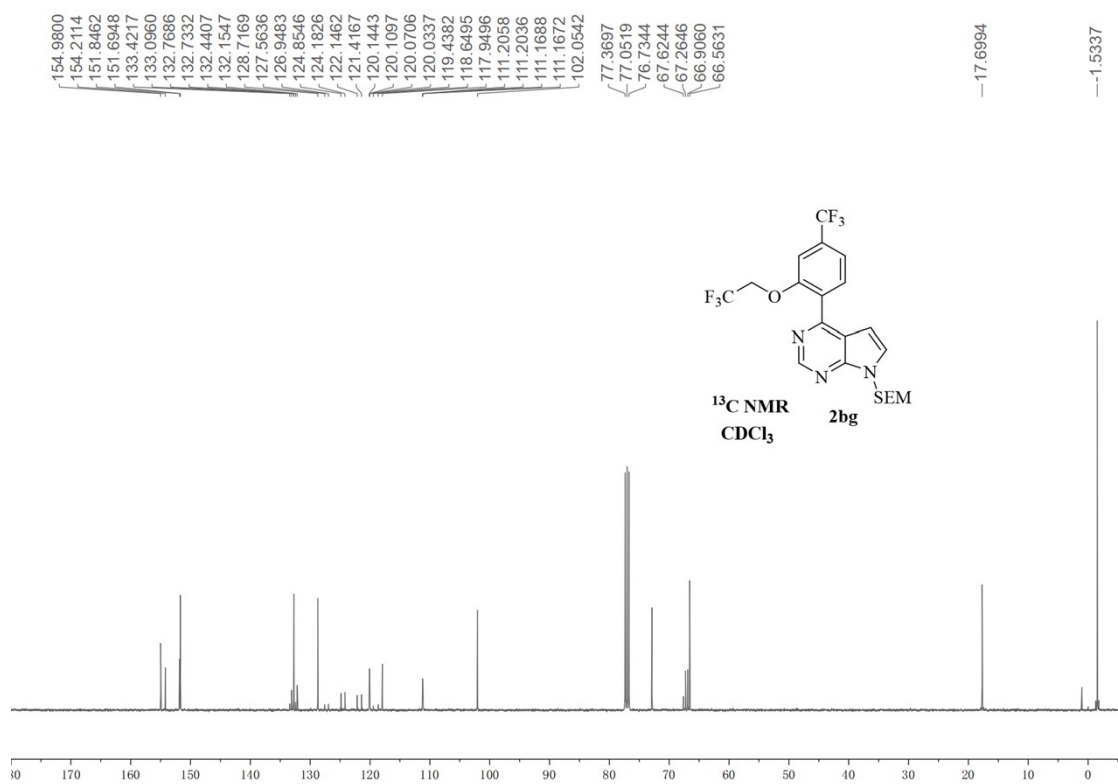

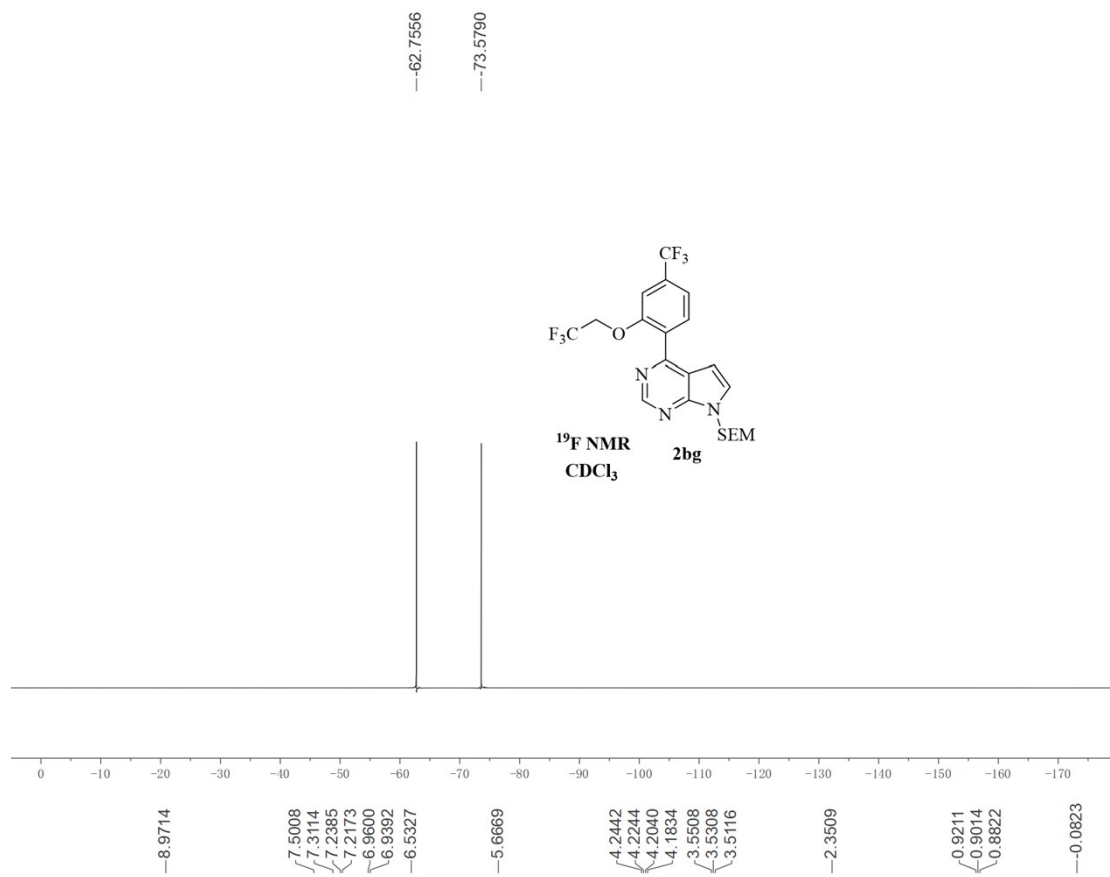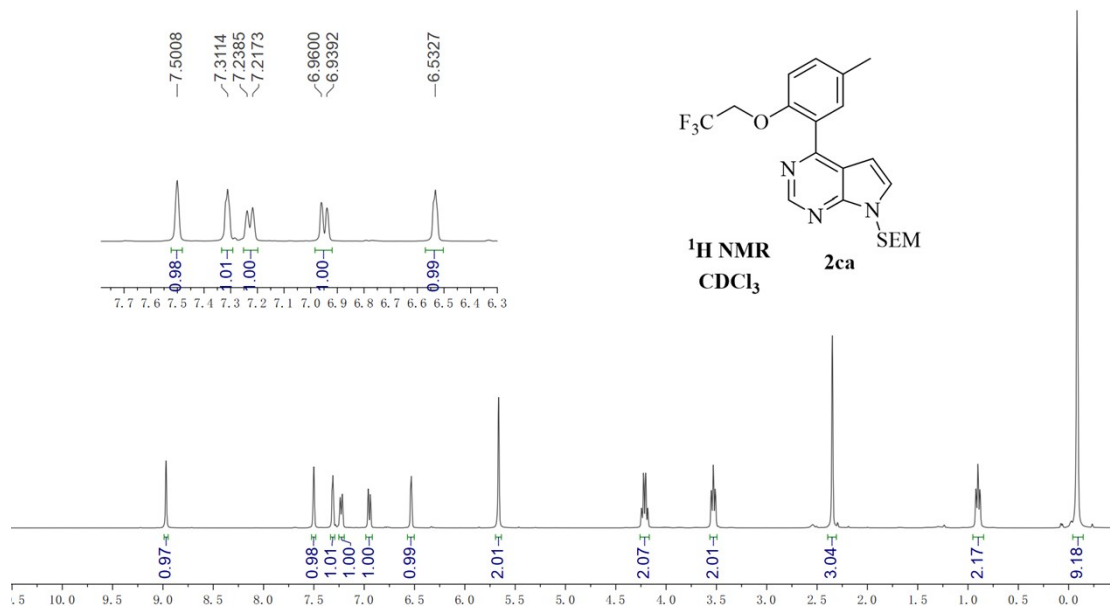

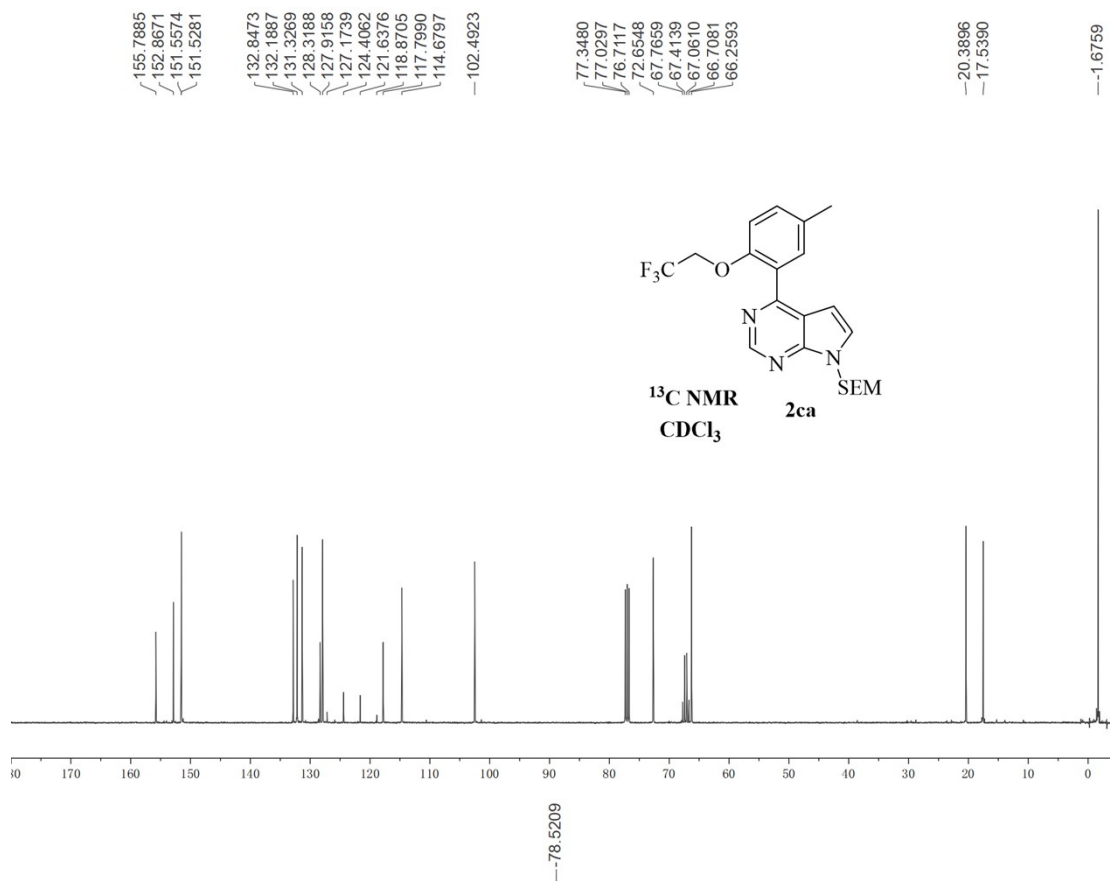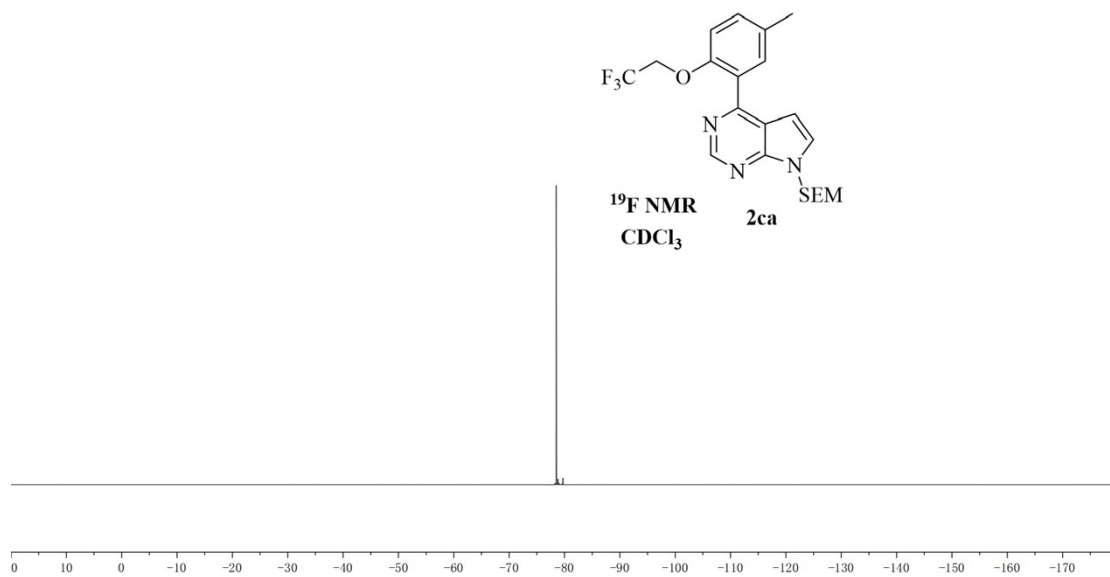

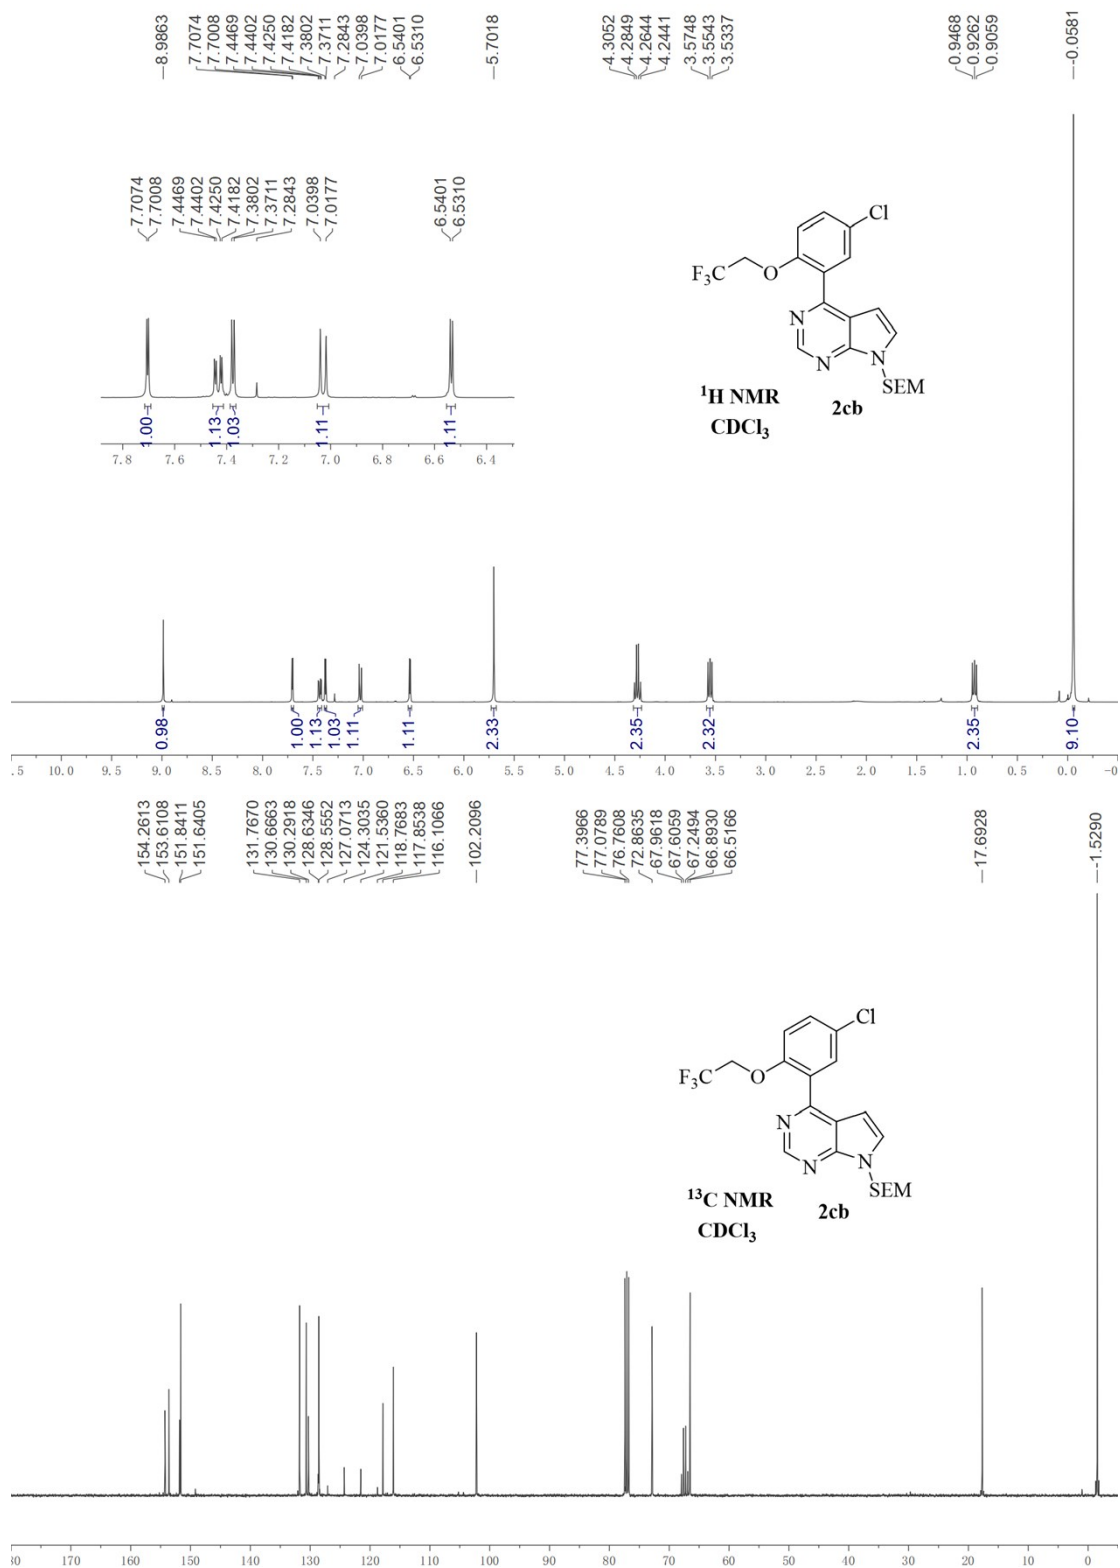

--73.6602

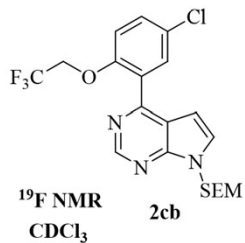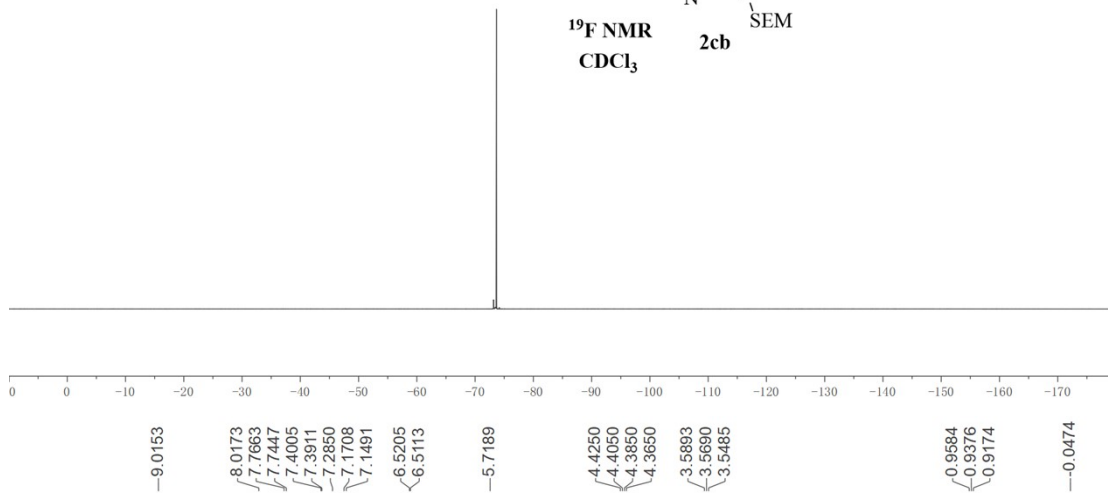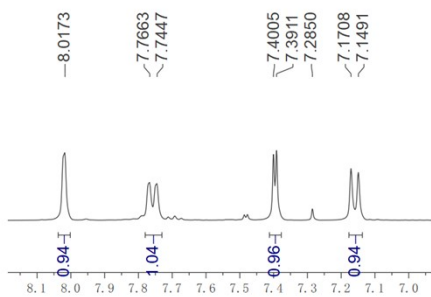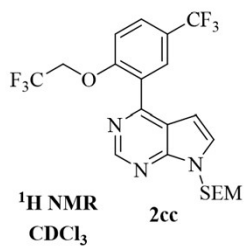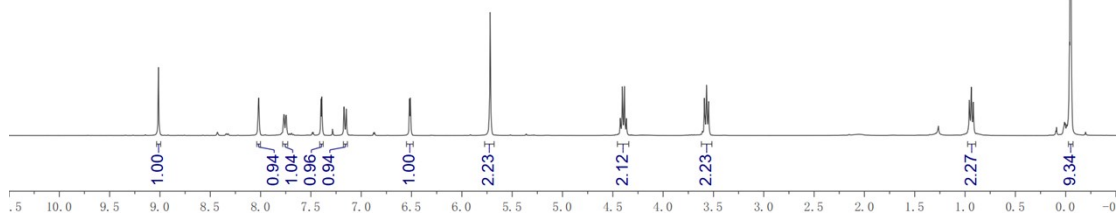



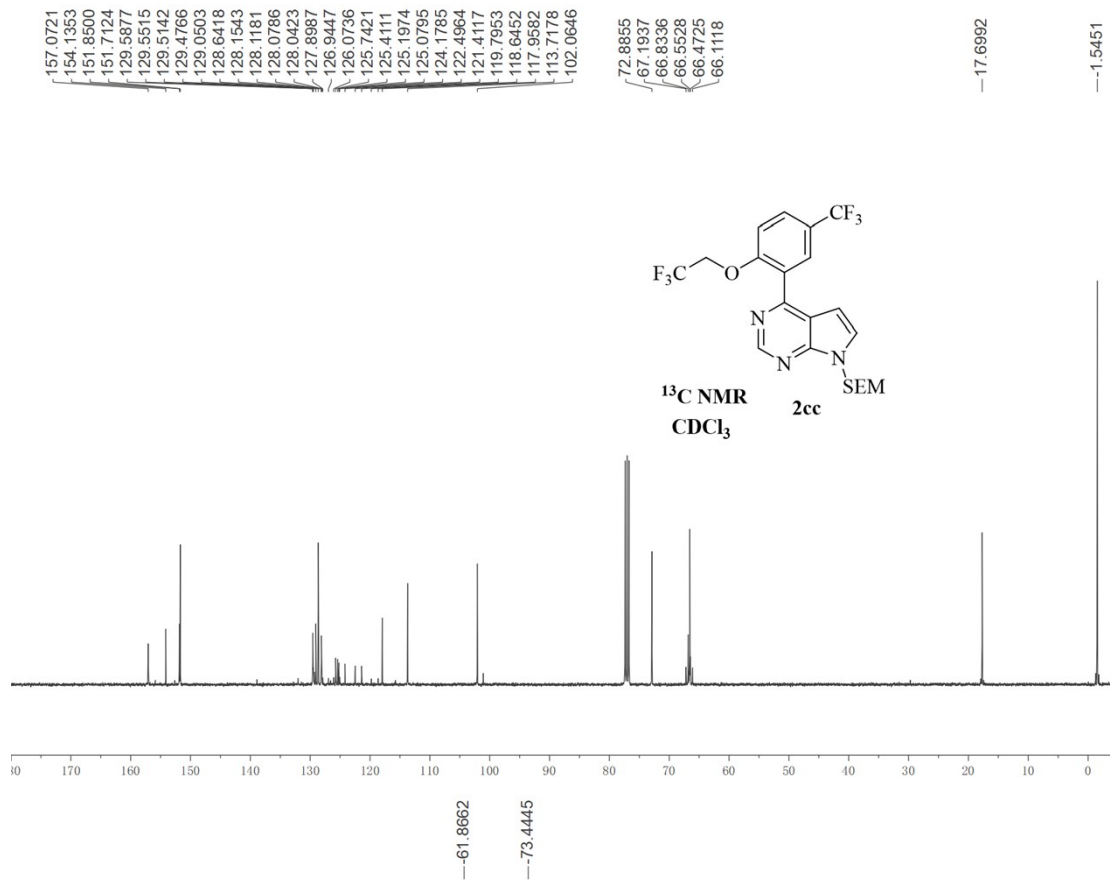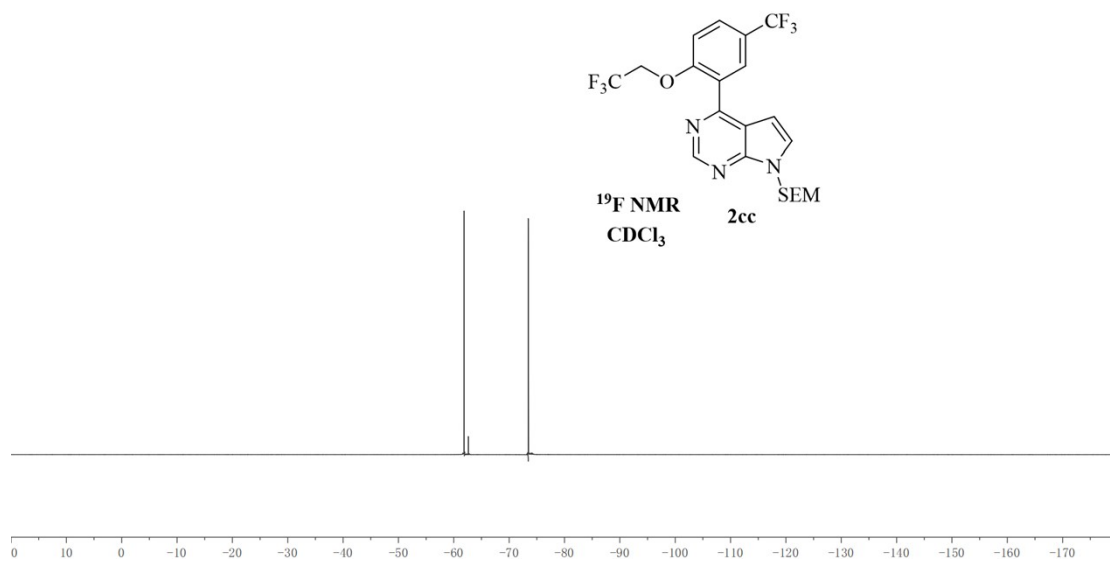

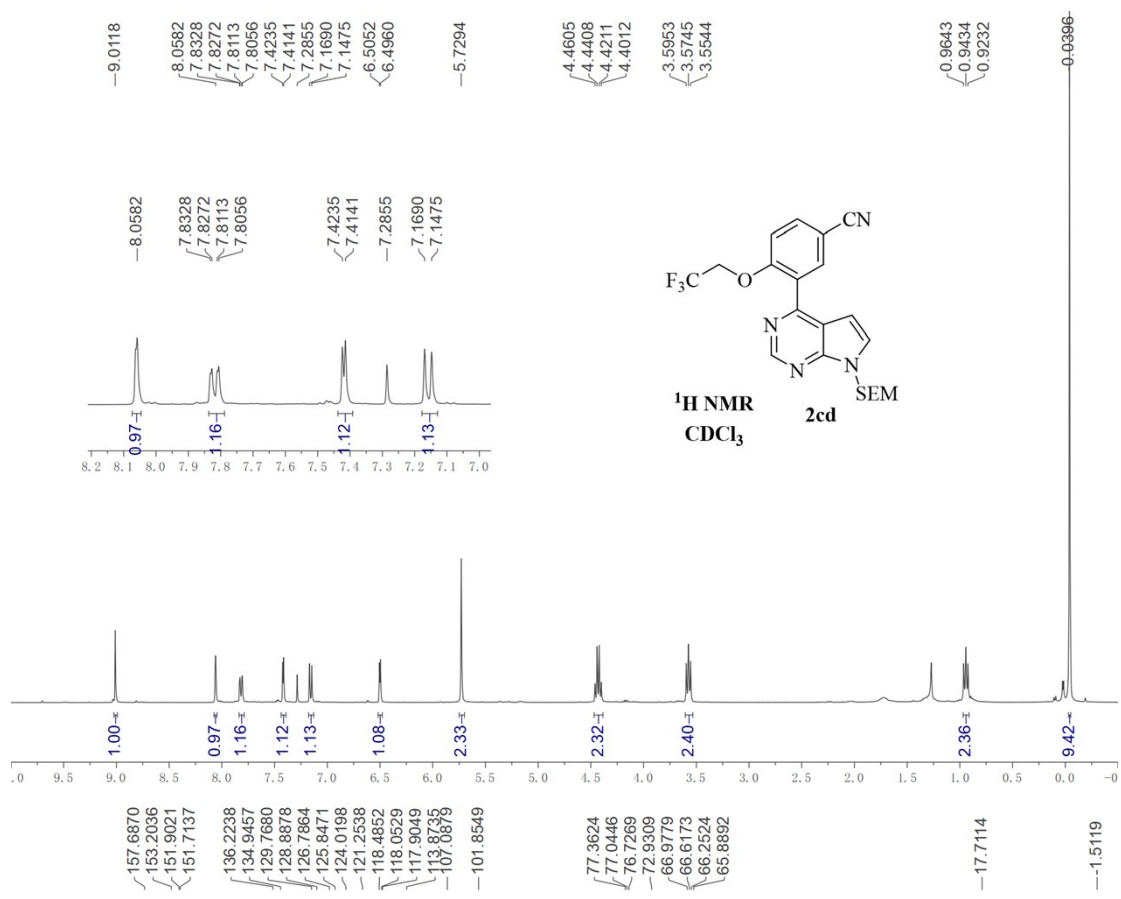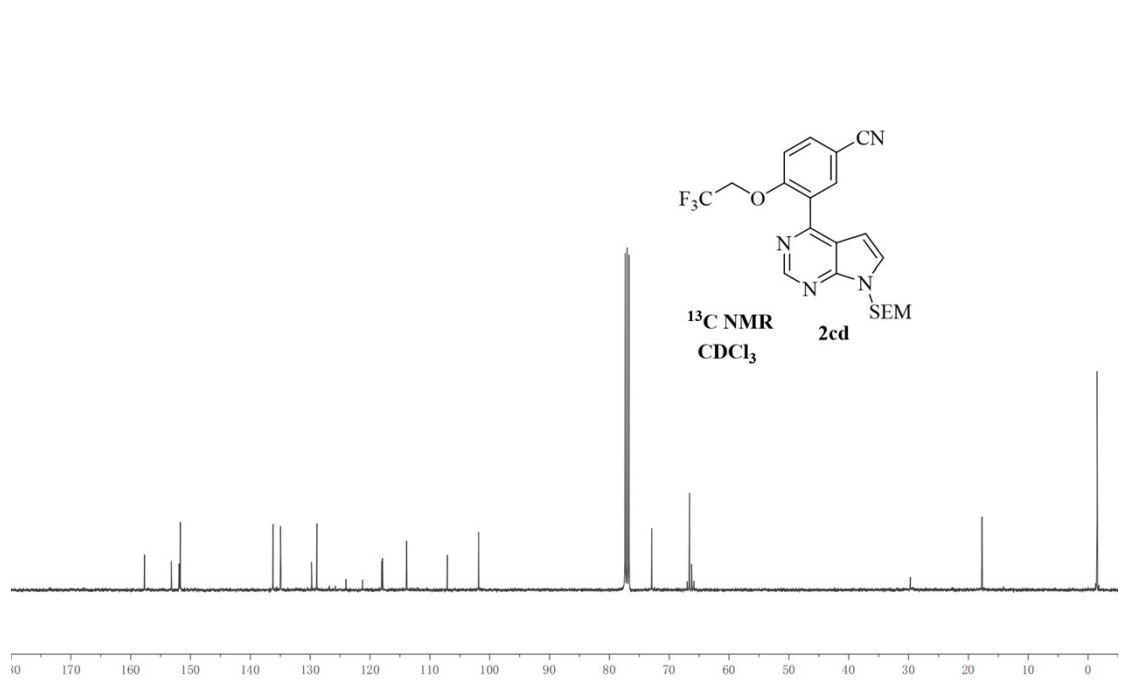

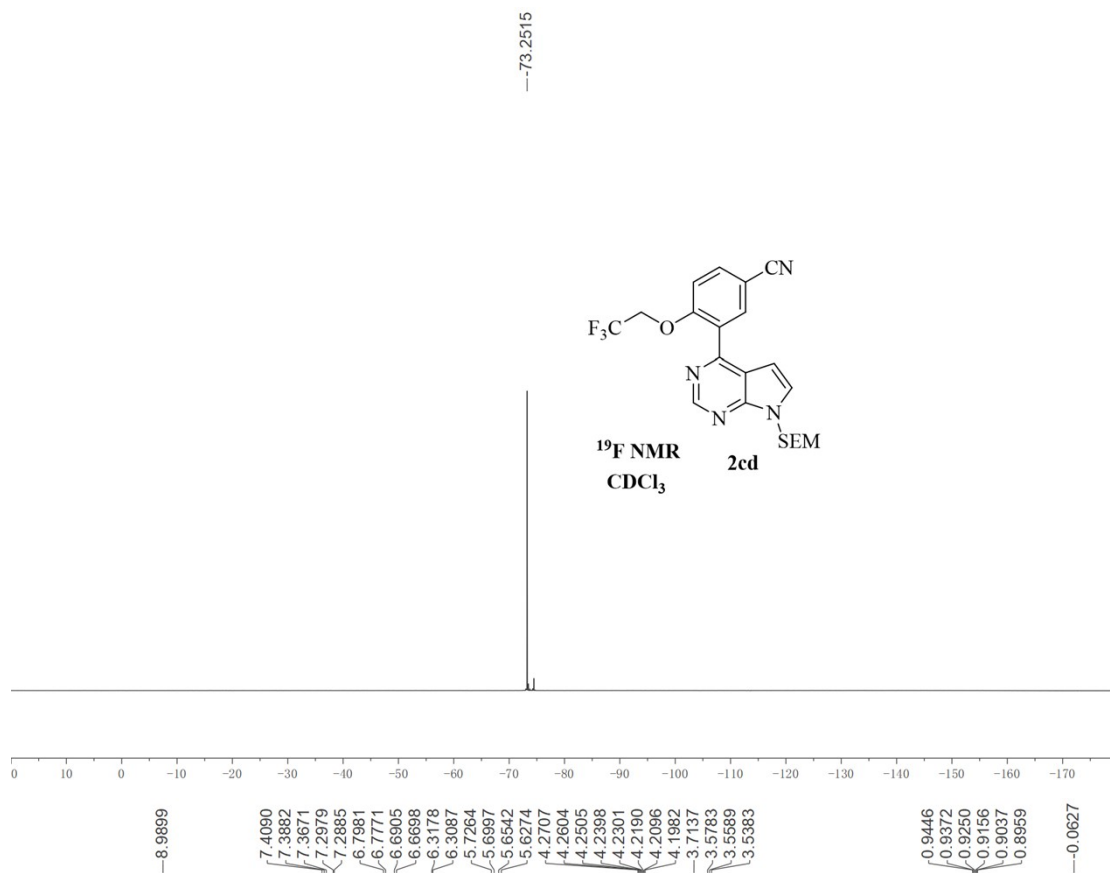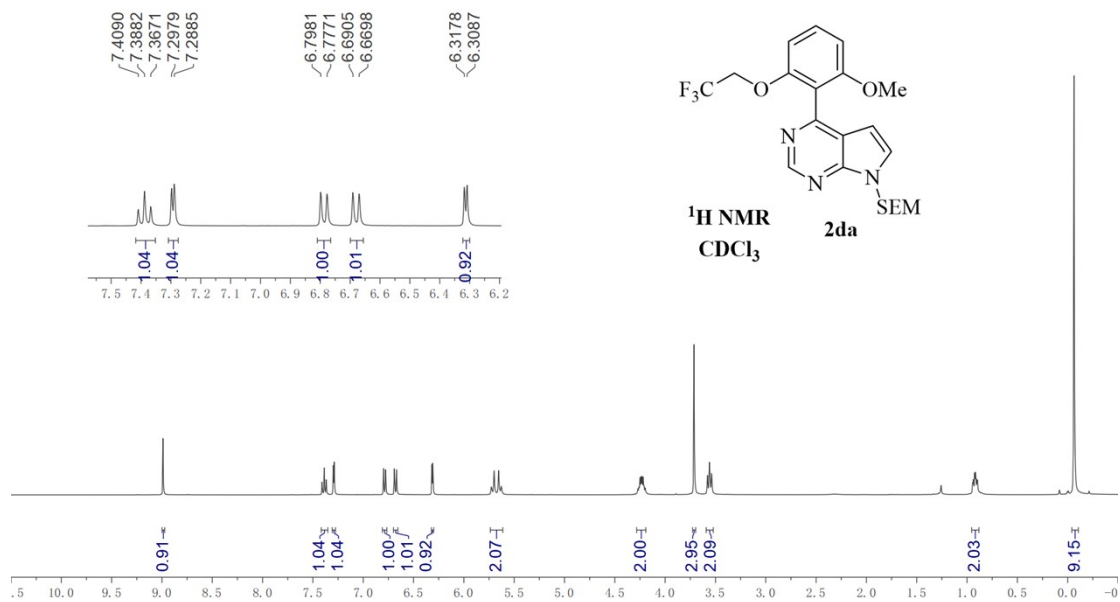

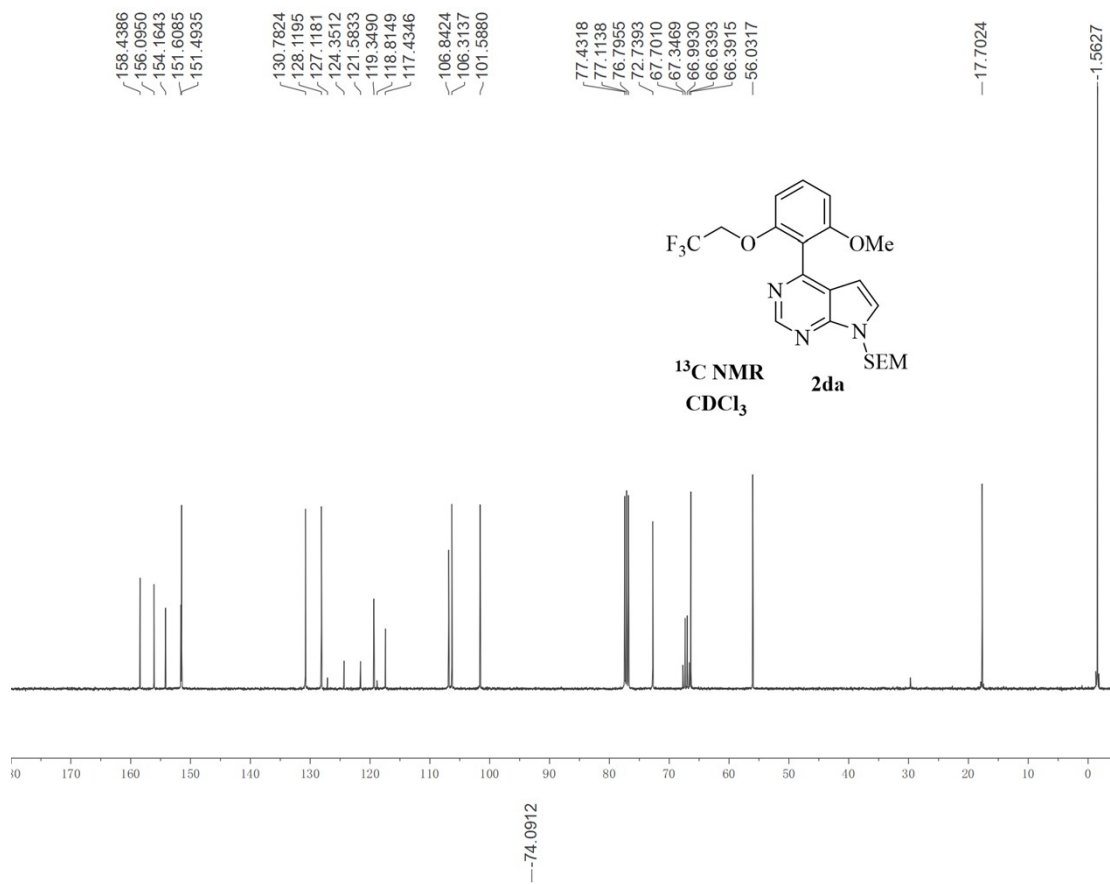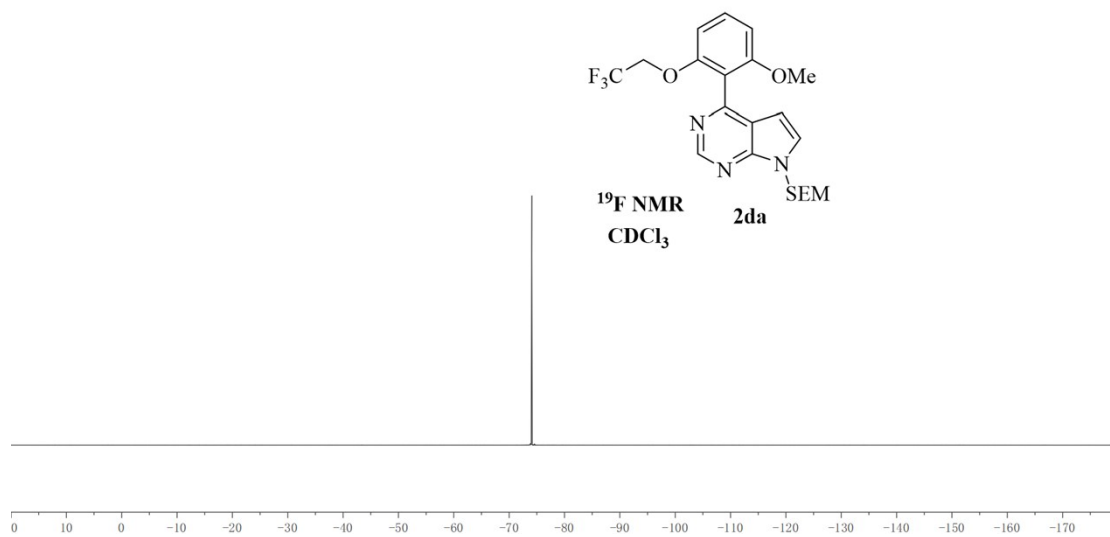

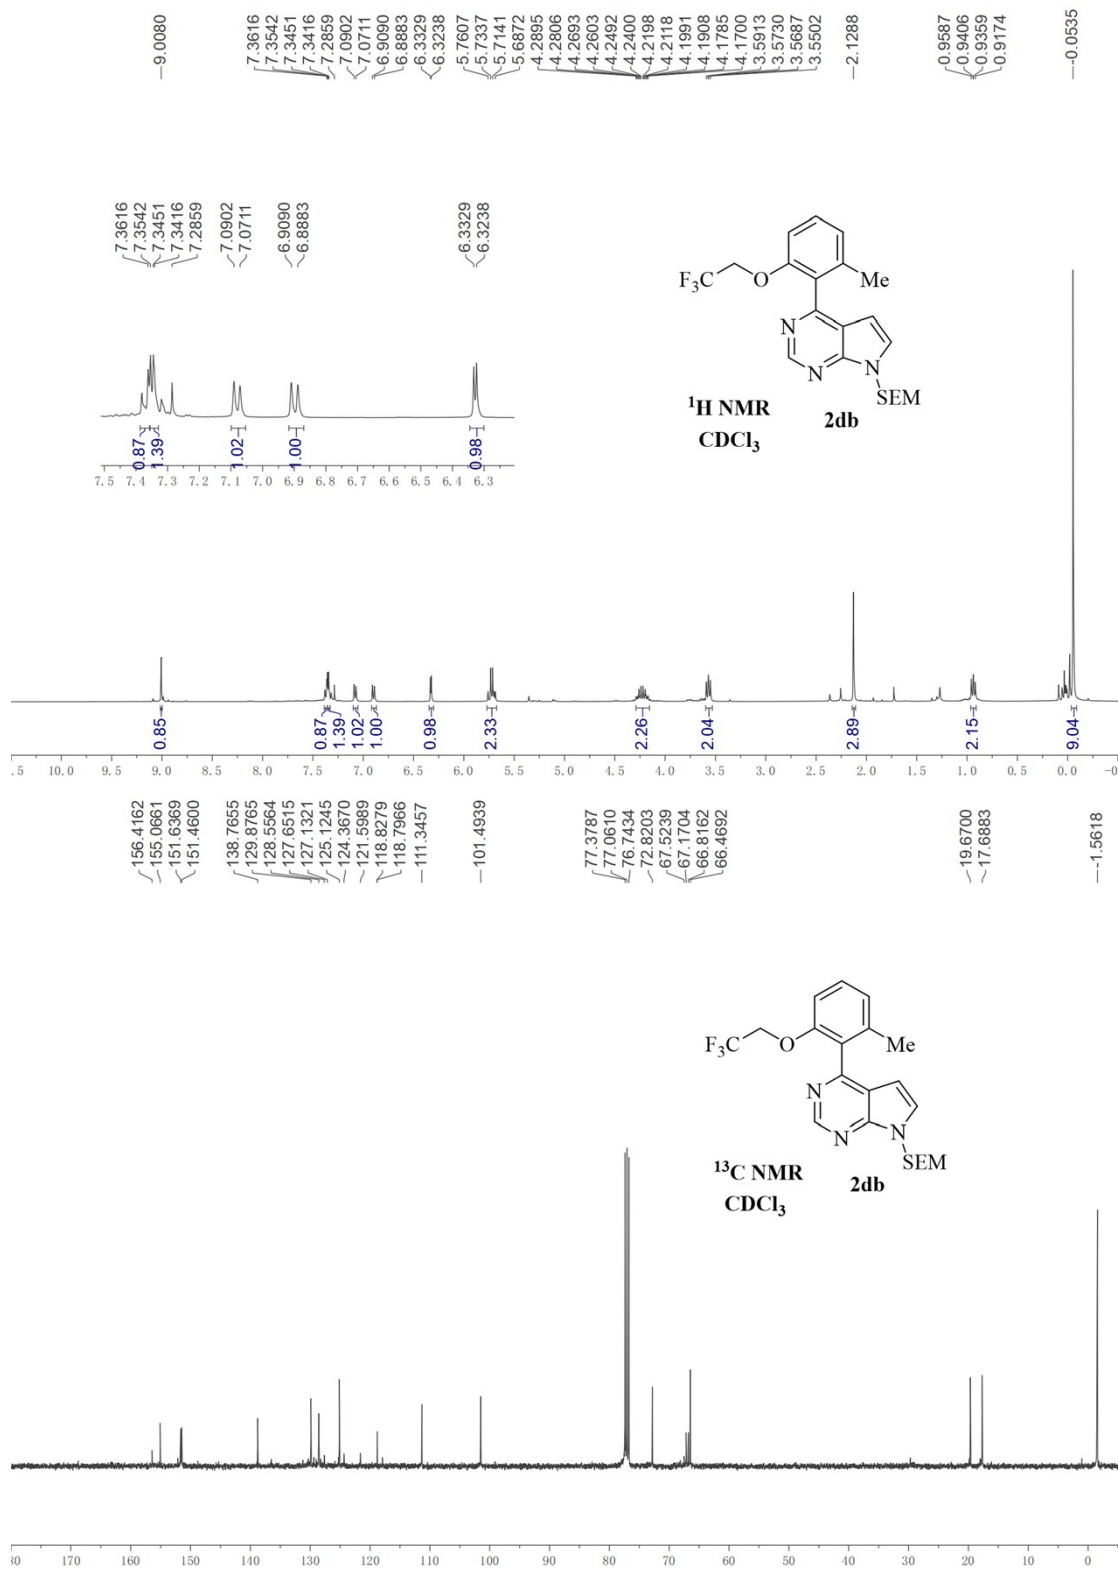

--74.1242

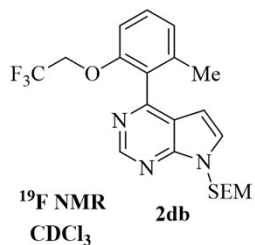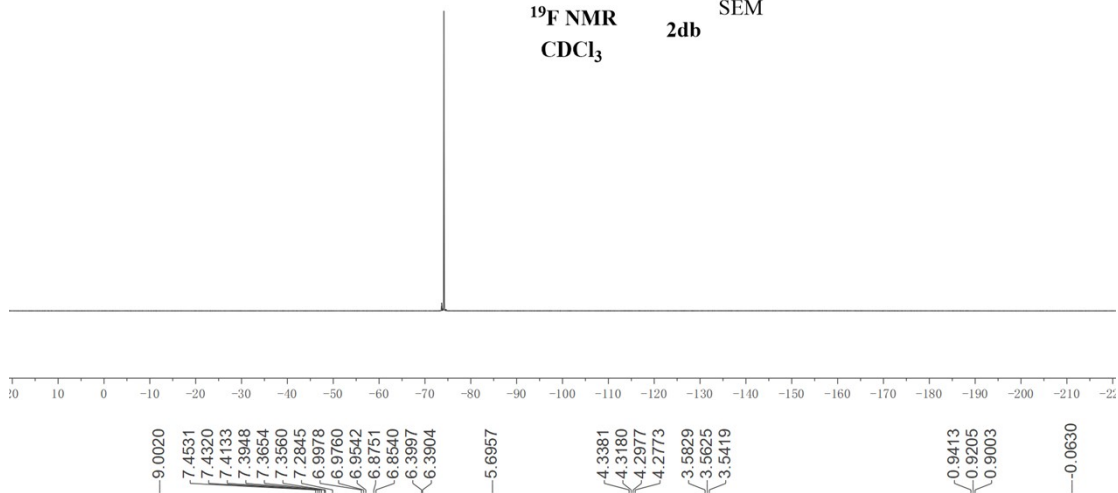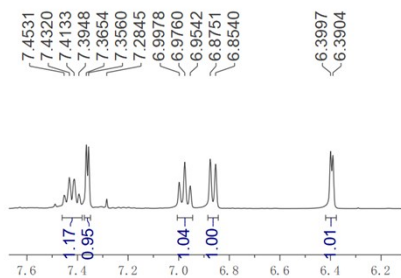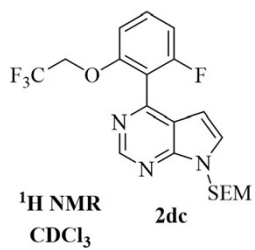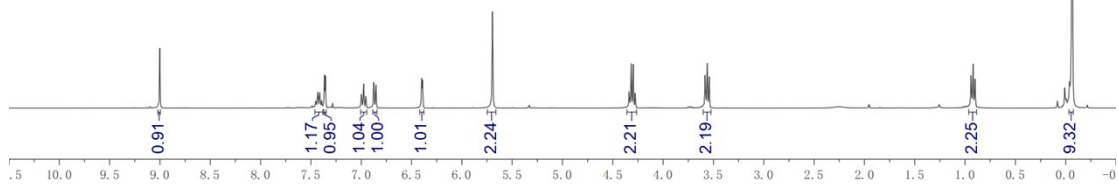

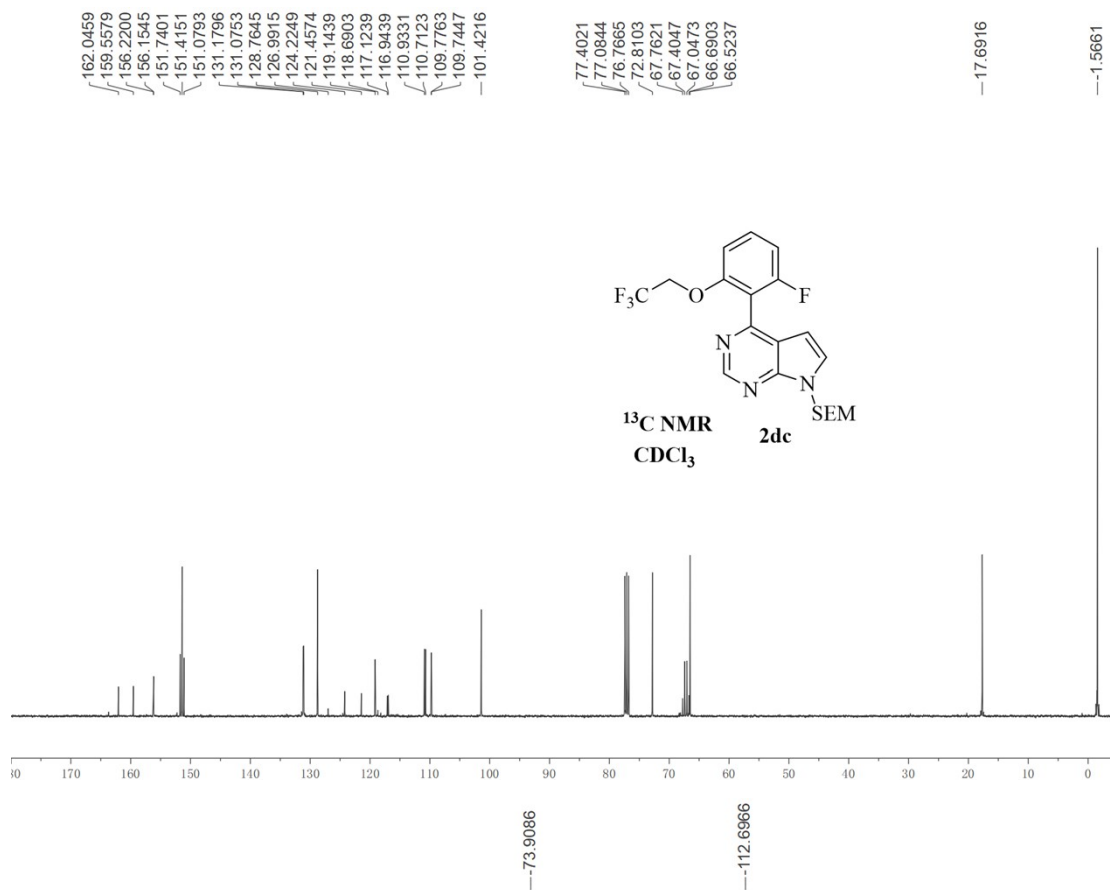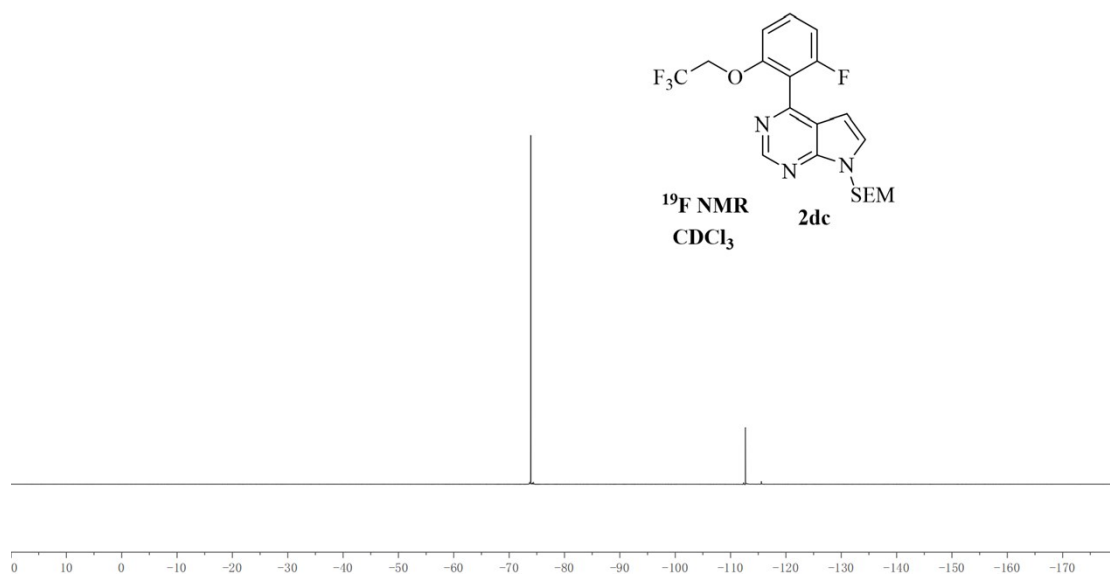

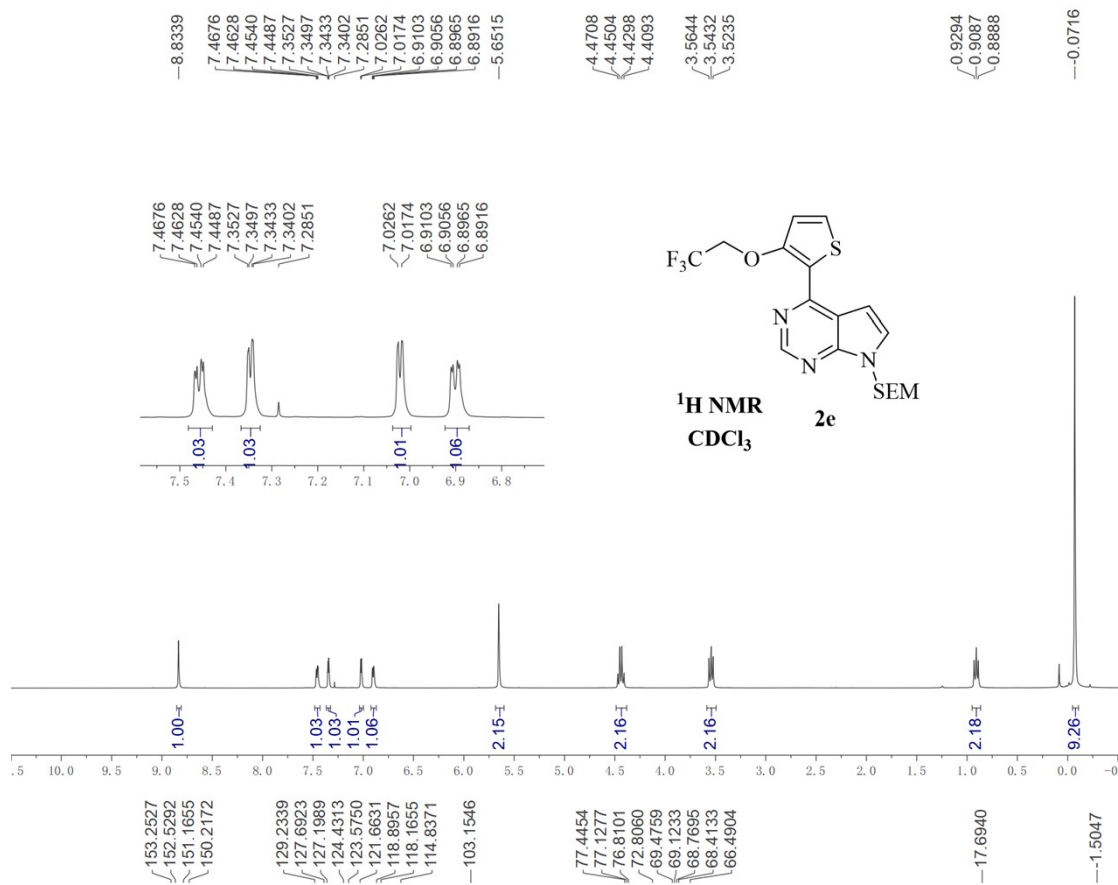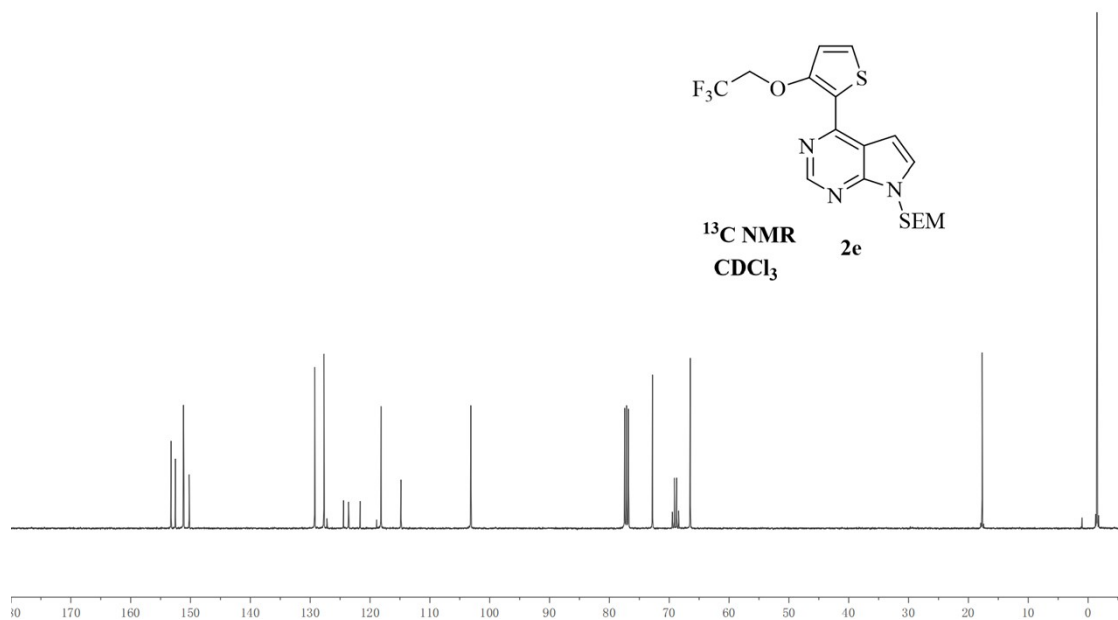



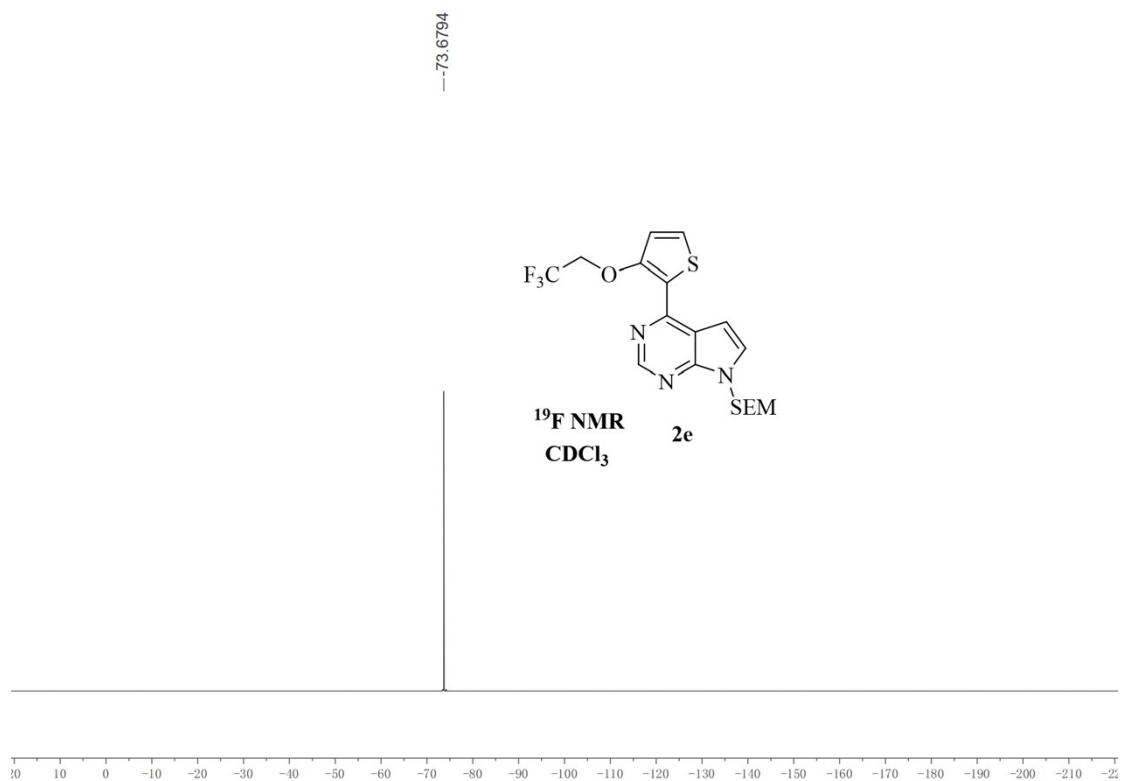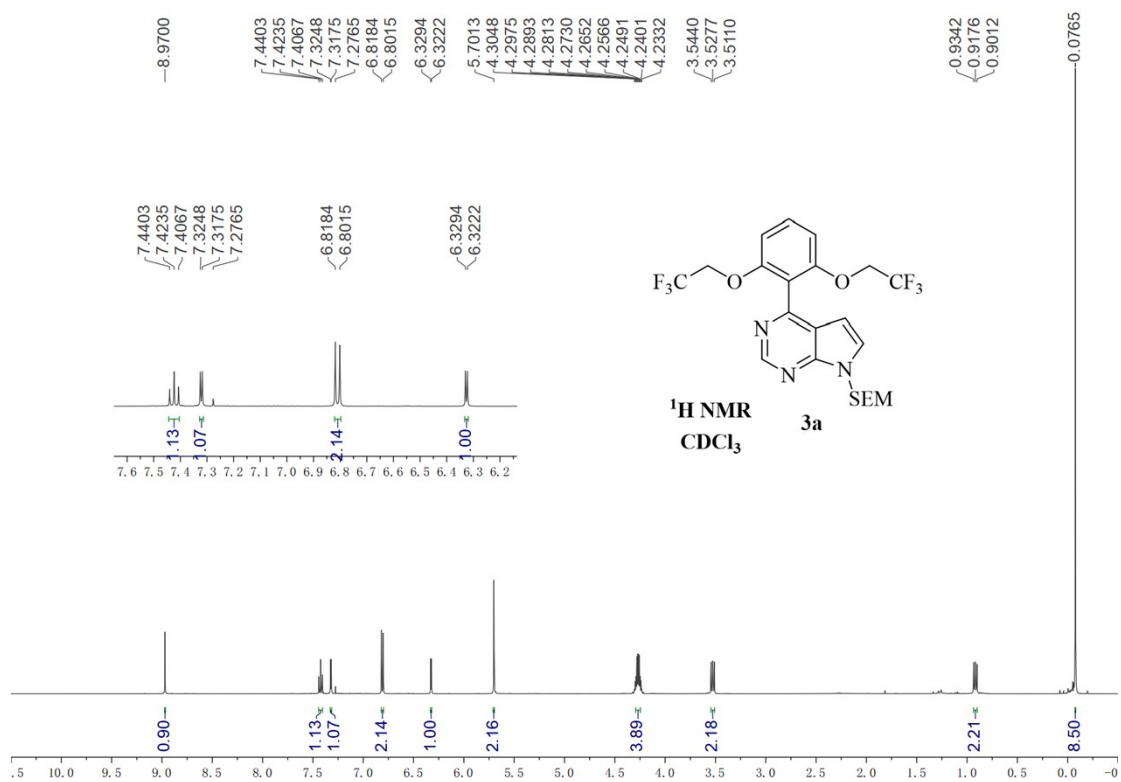

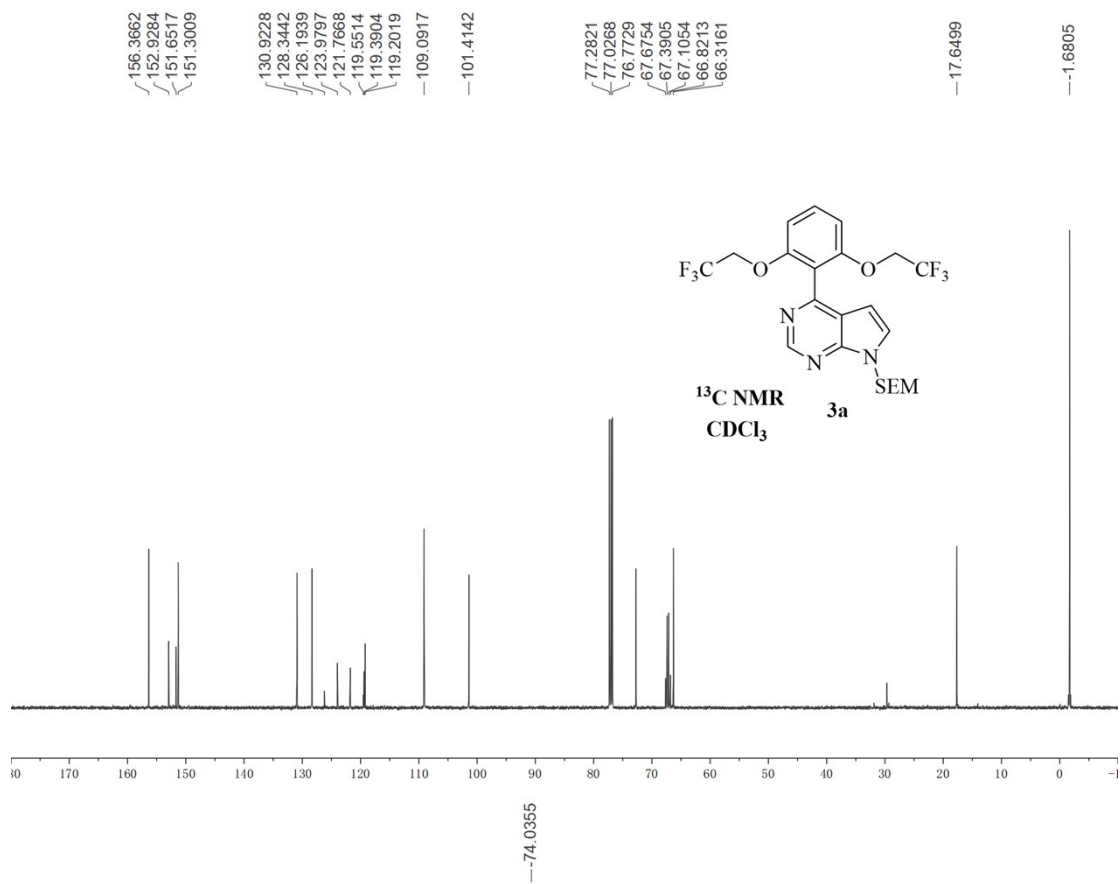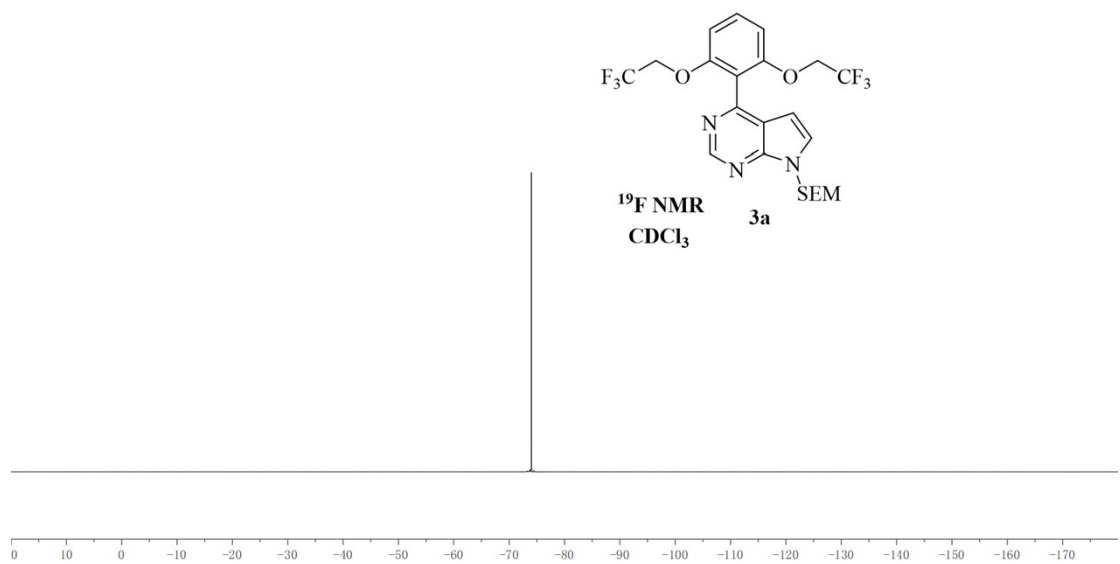

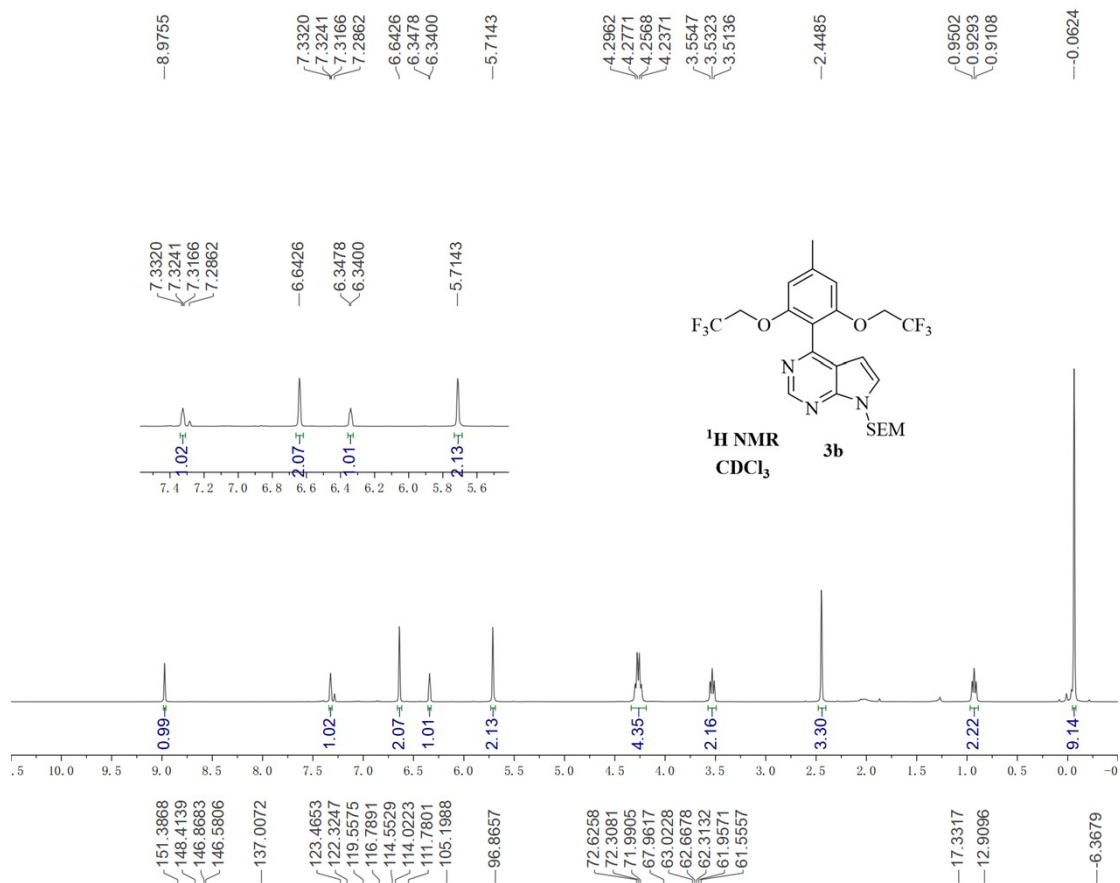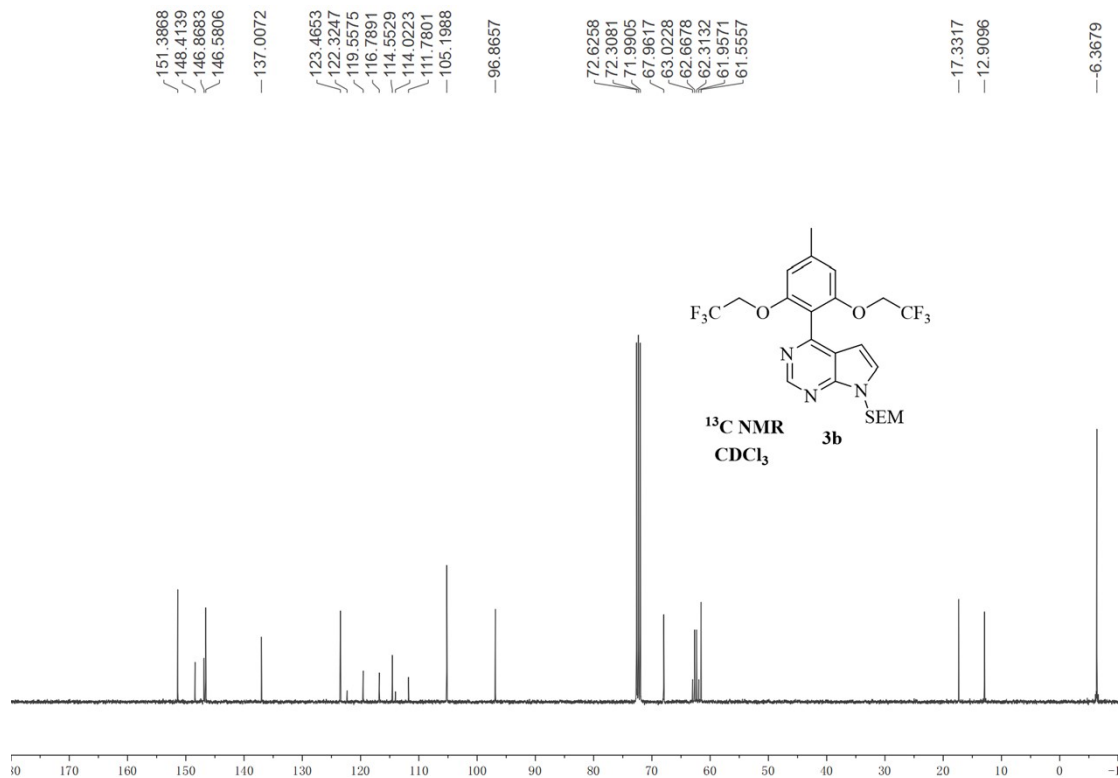

--74.0450

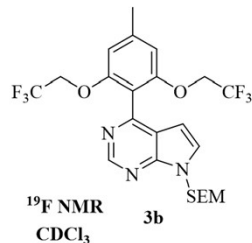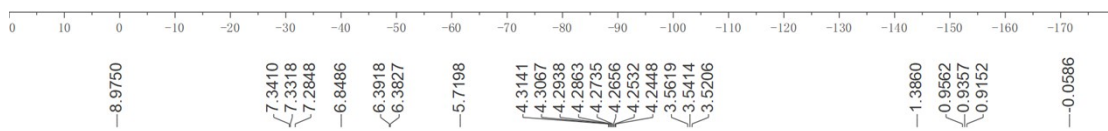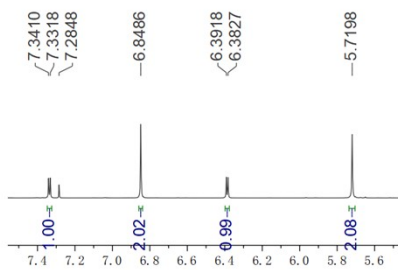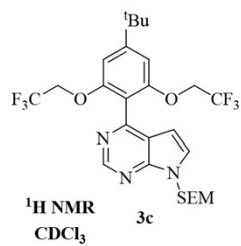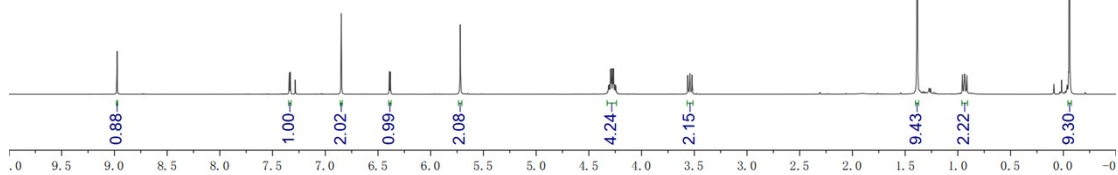

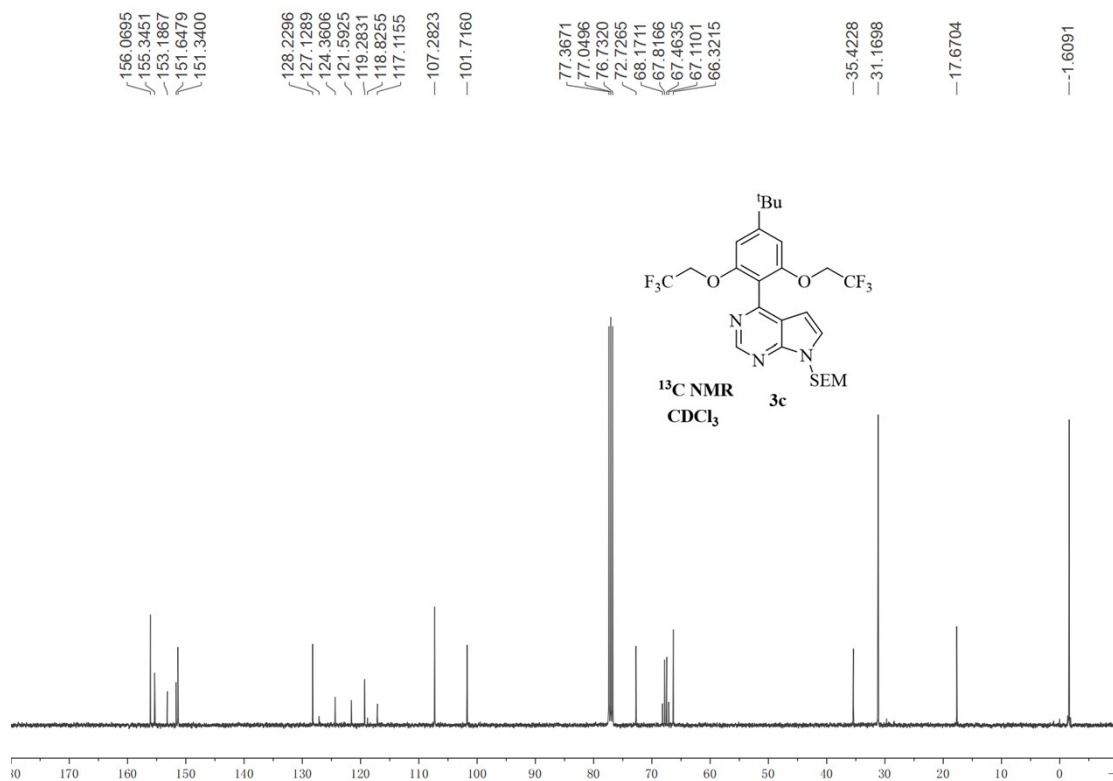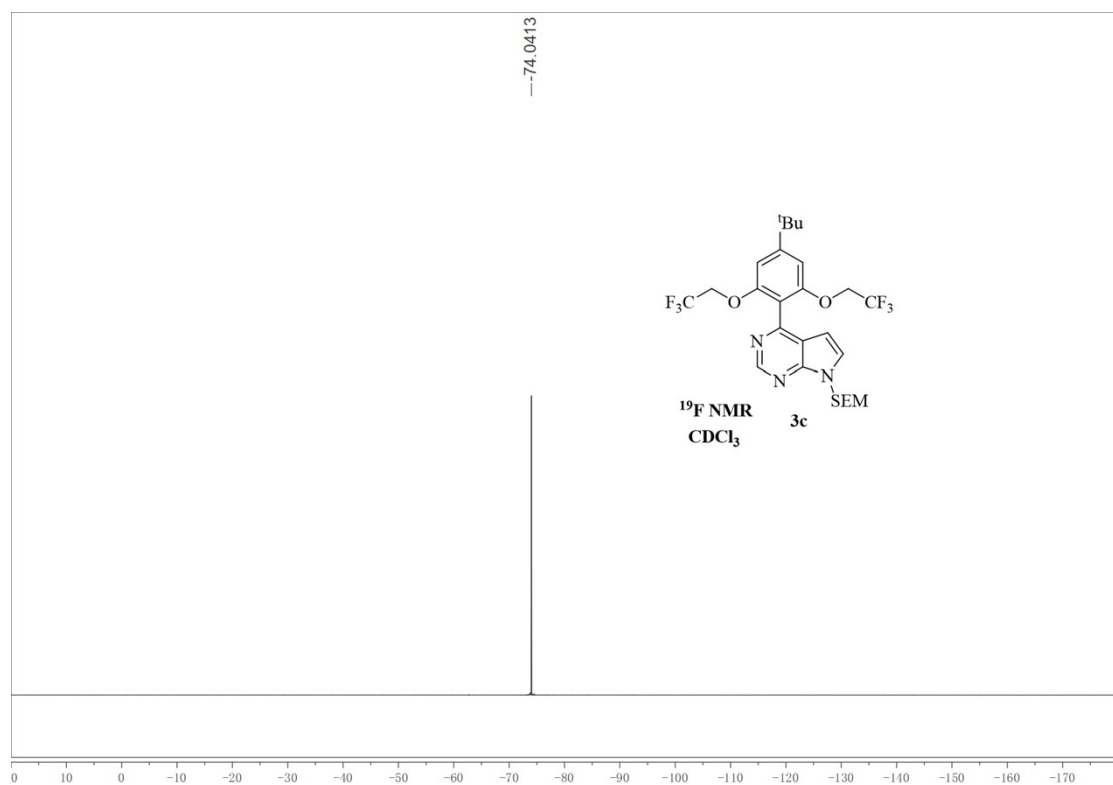

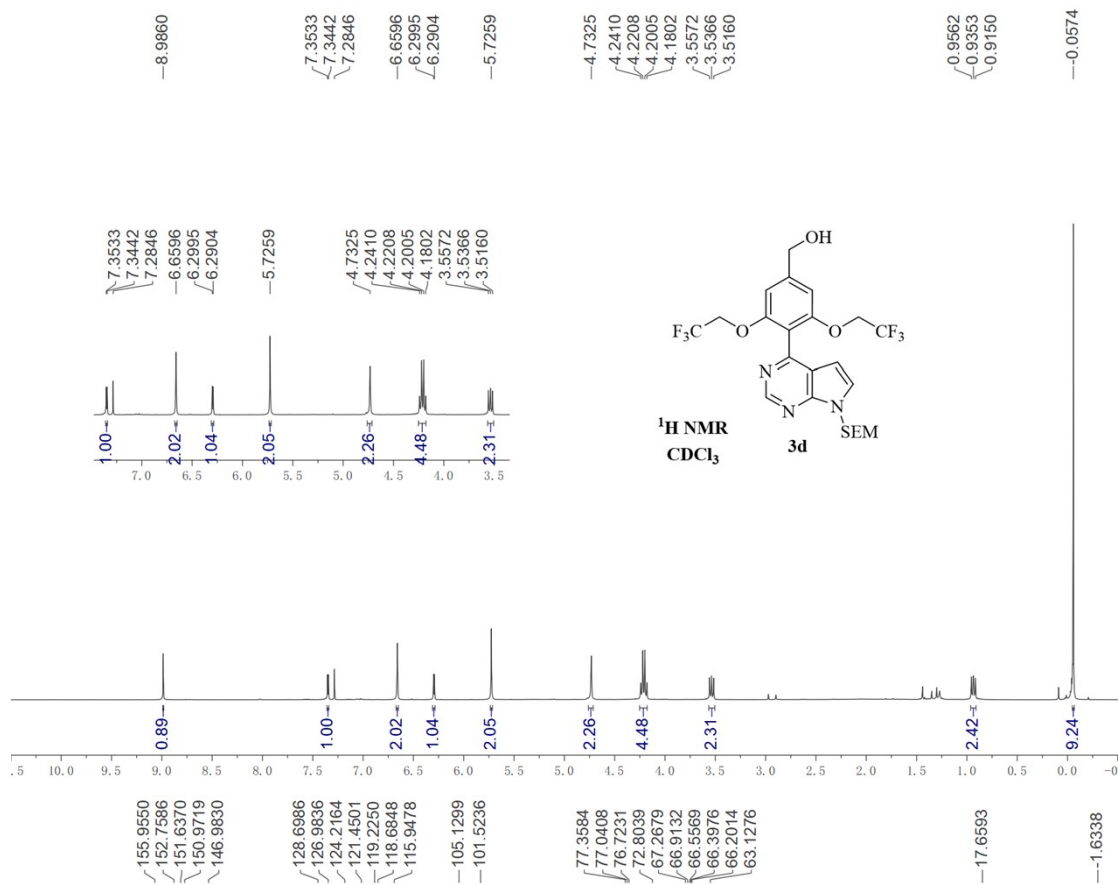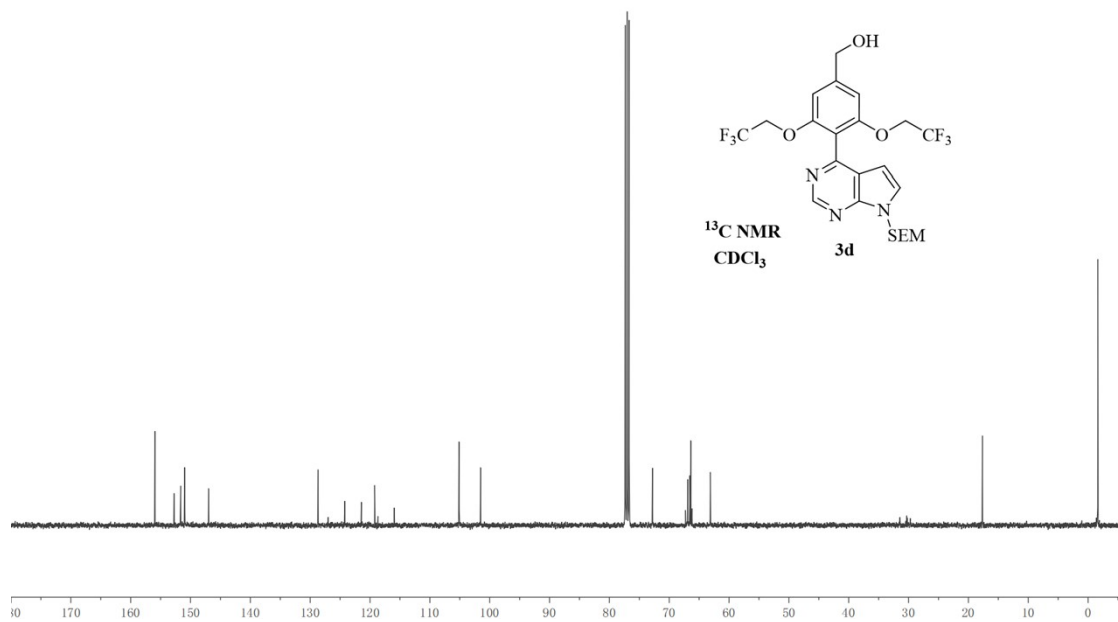

--74.0247

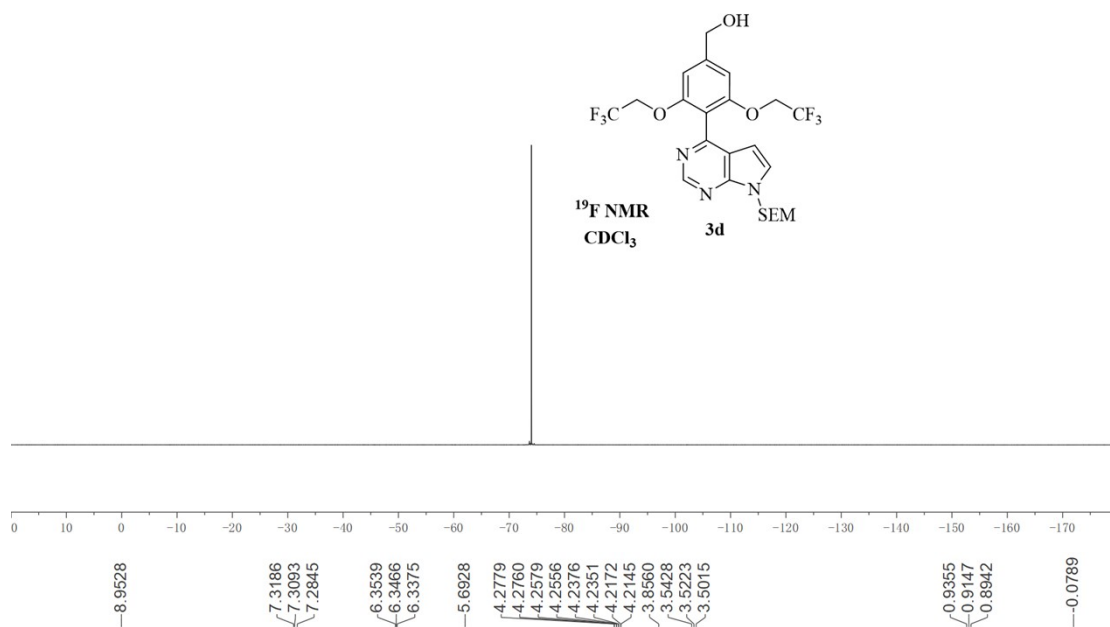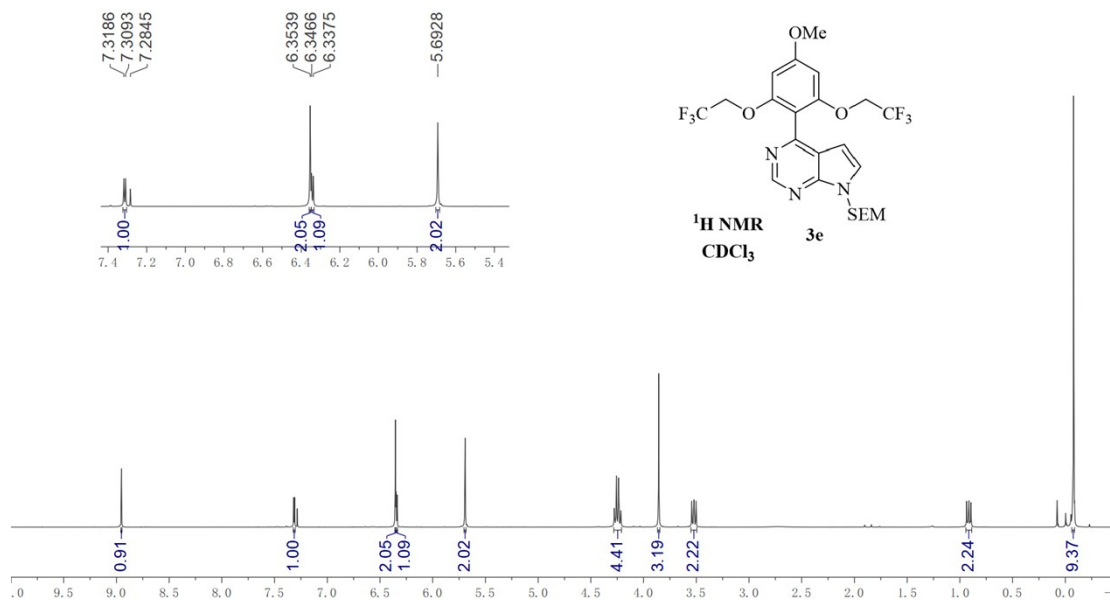

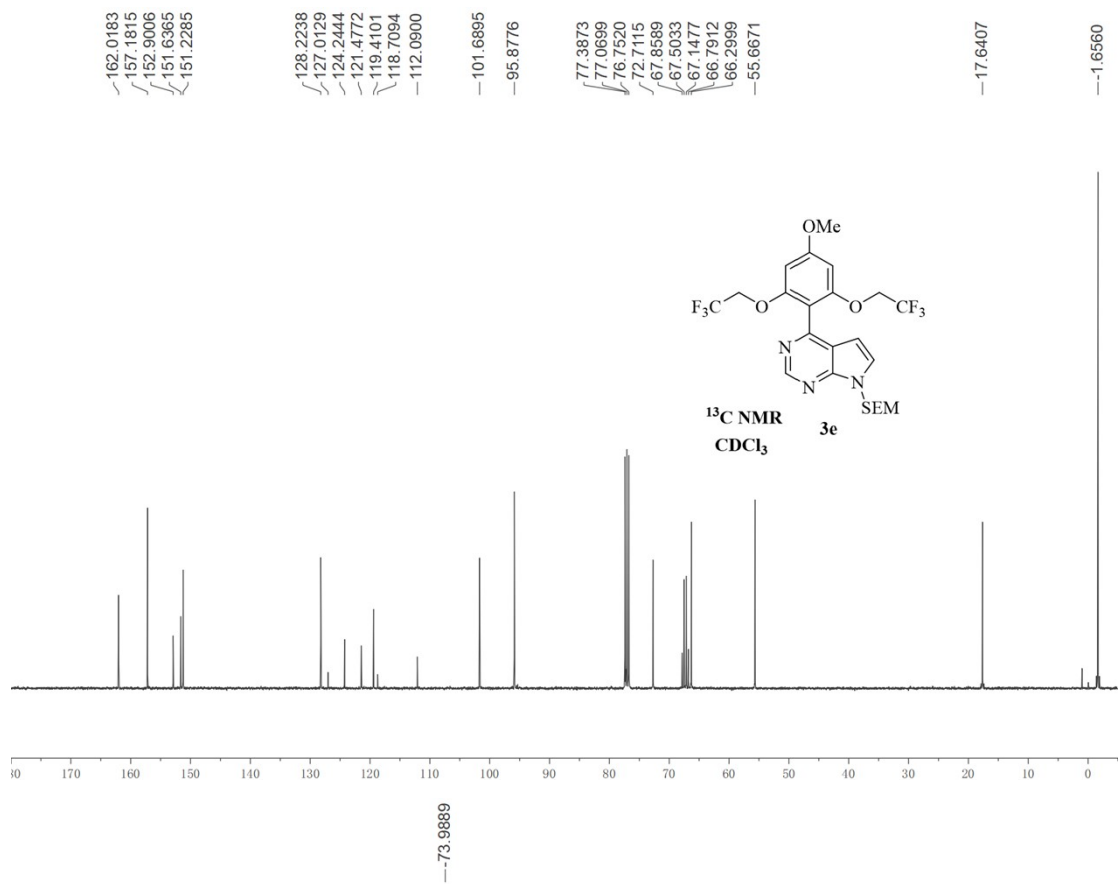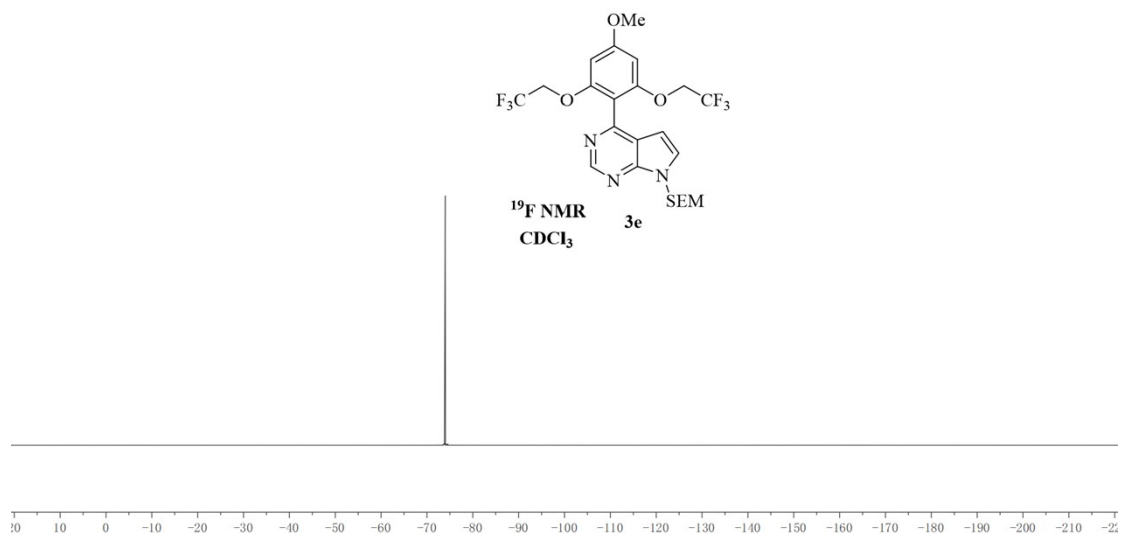



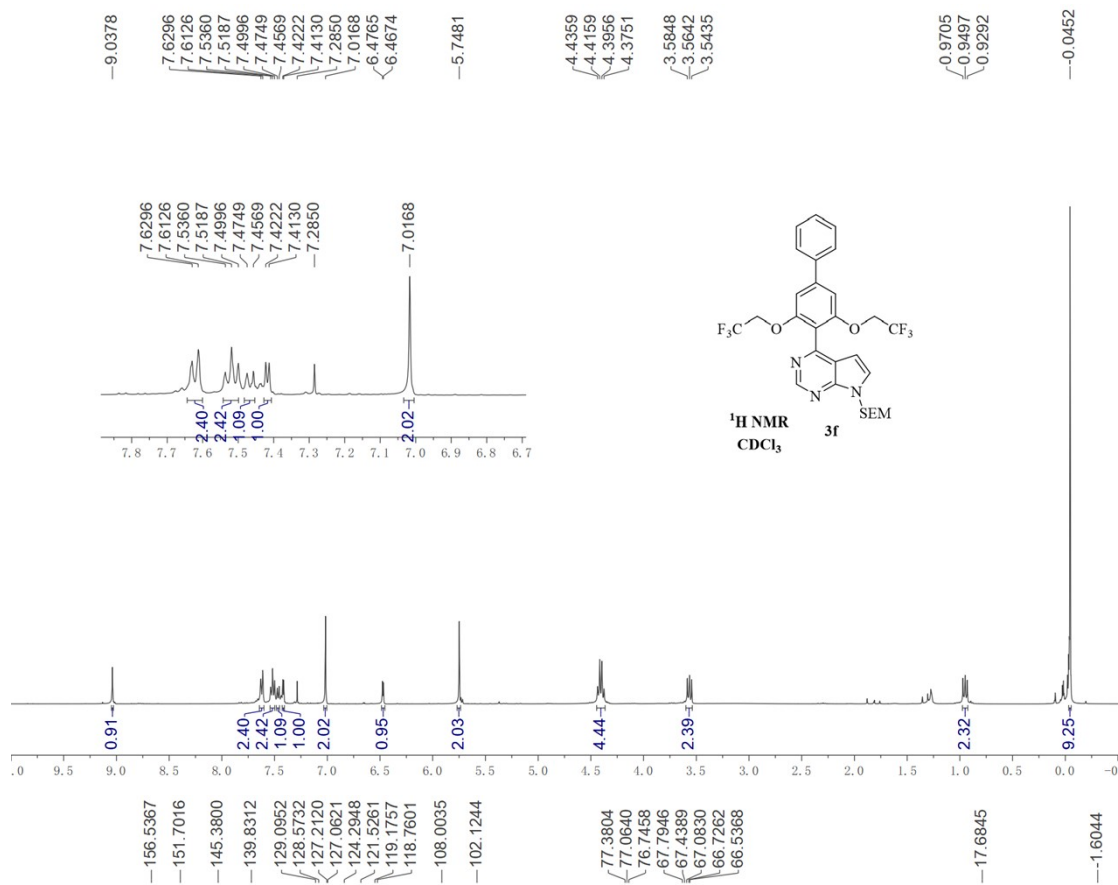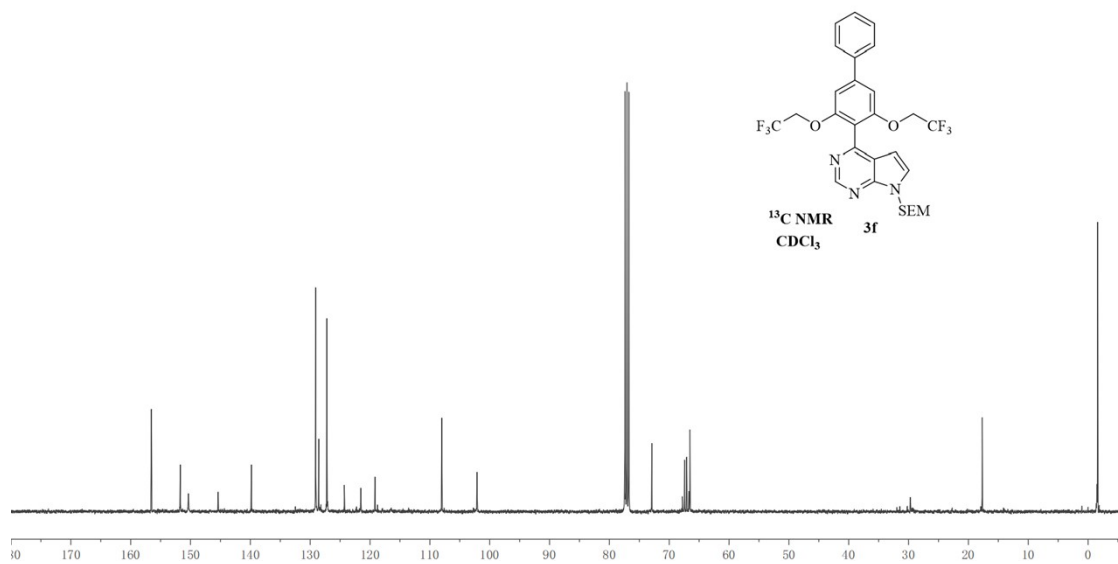

—73.8298

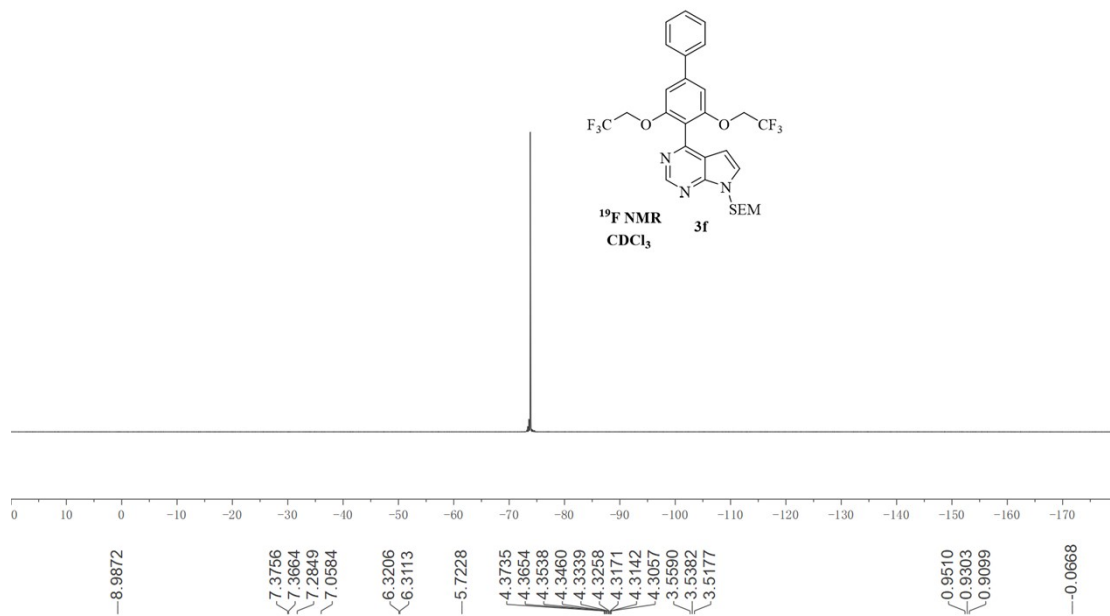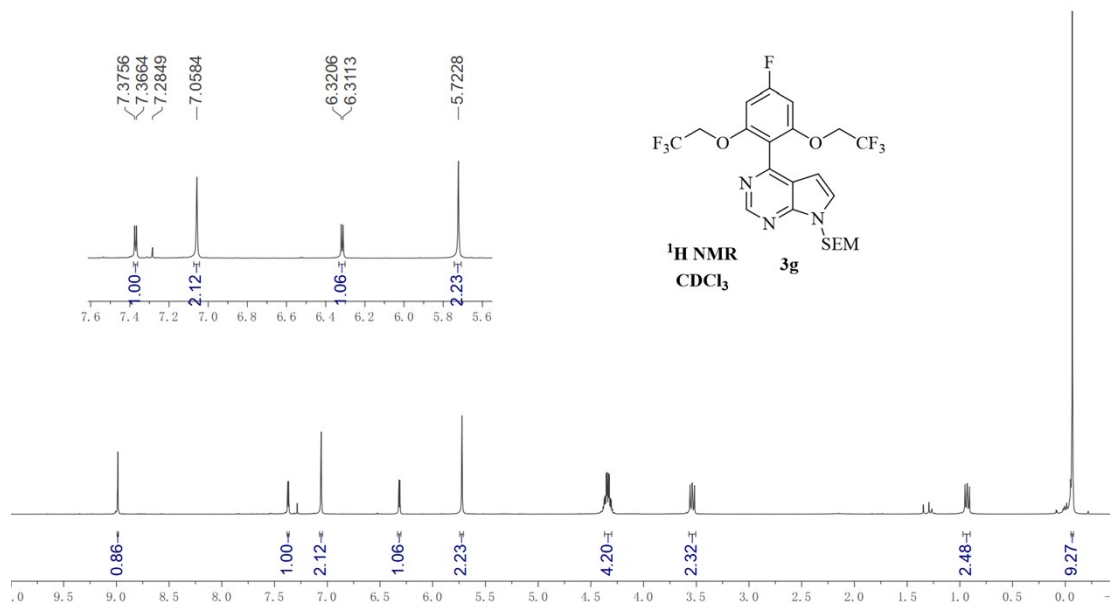

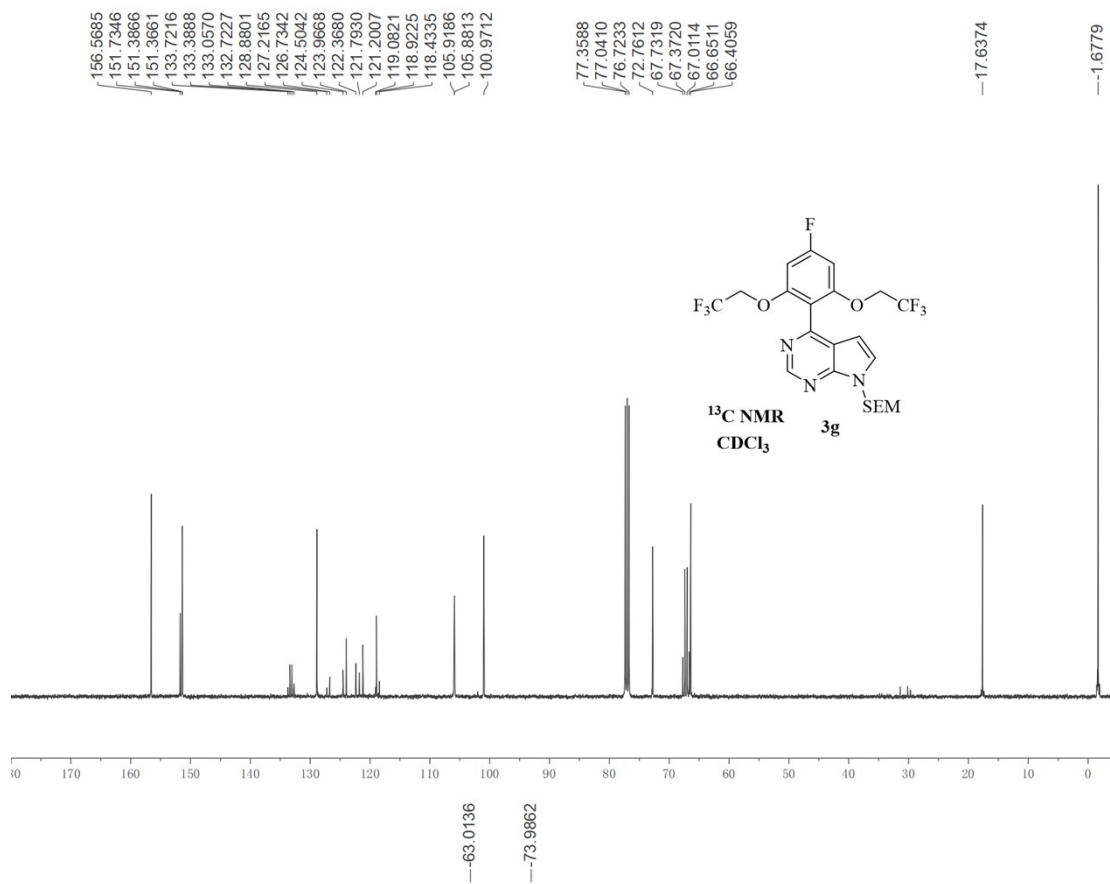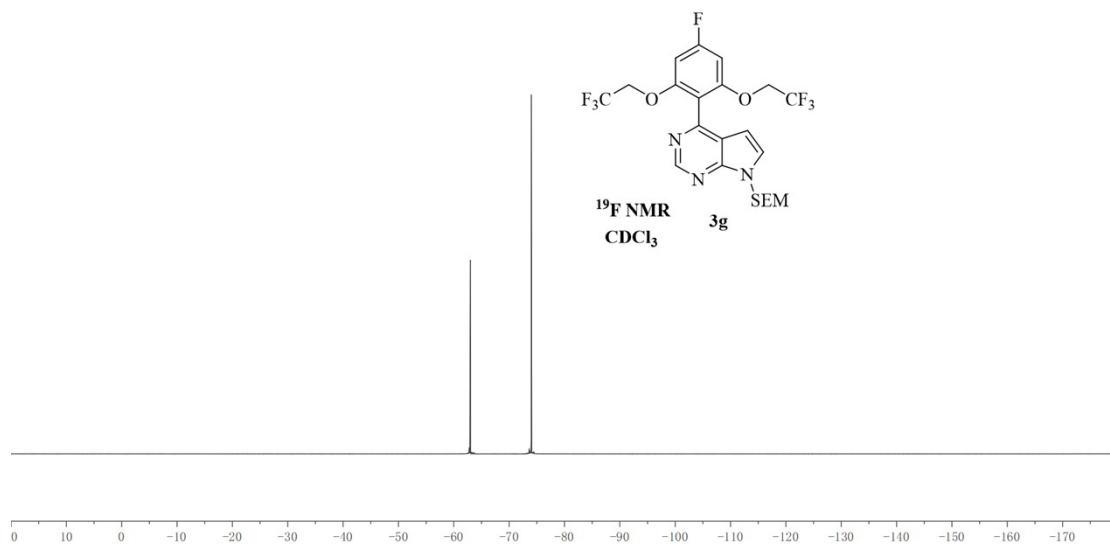

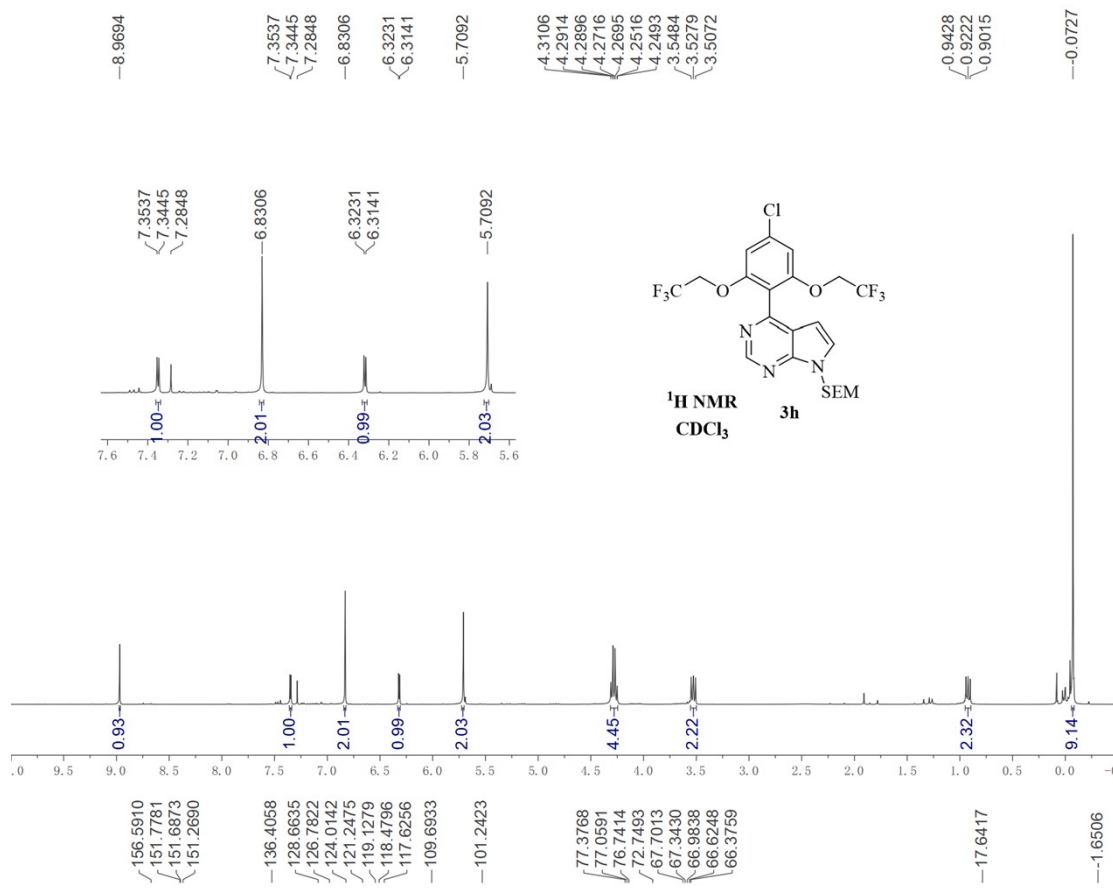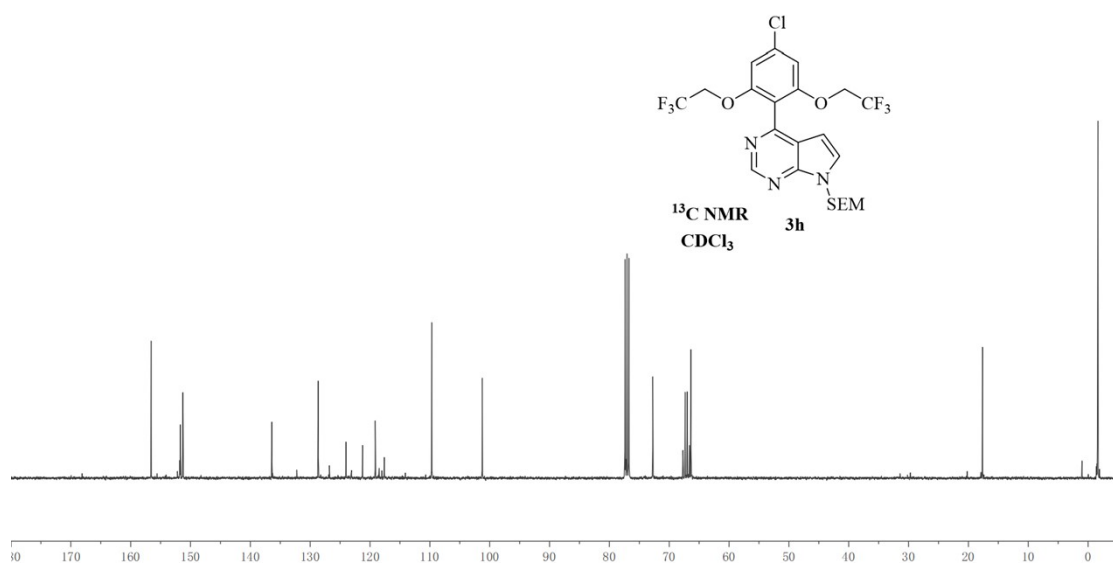

-73.9431

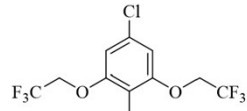

<sup>19</sup>F NMR  
CDCl<sub>3</sub>

3h

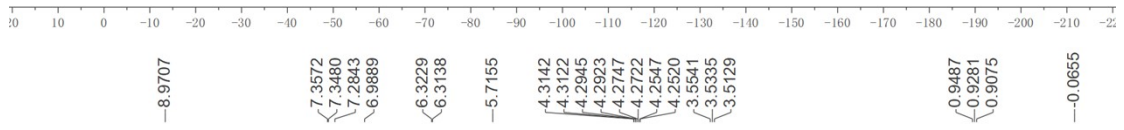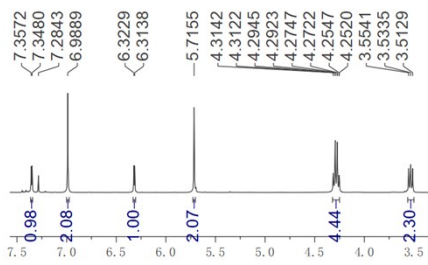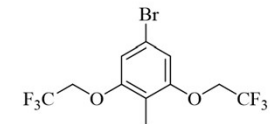

<sup>1</sup>H NMR  
CDCl<sub>3</sub>

3i

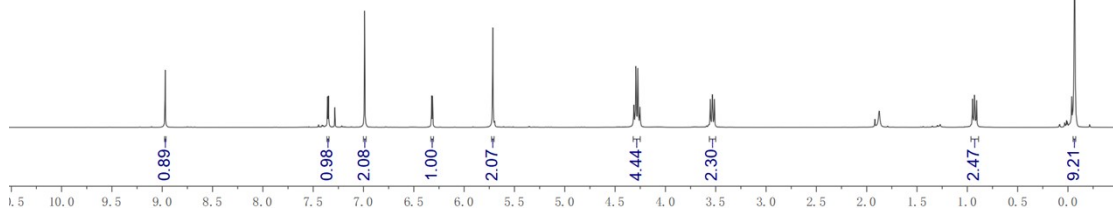

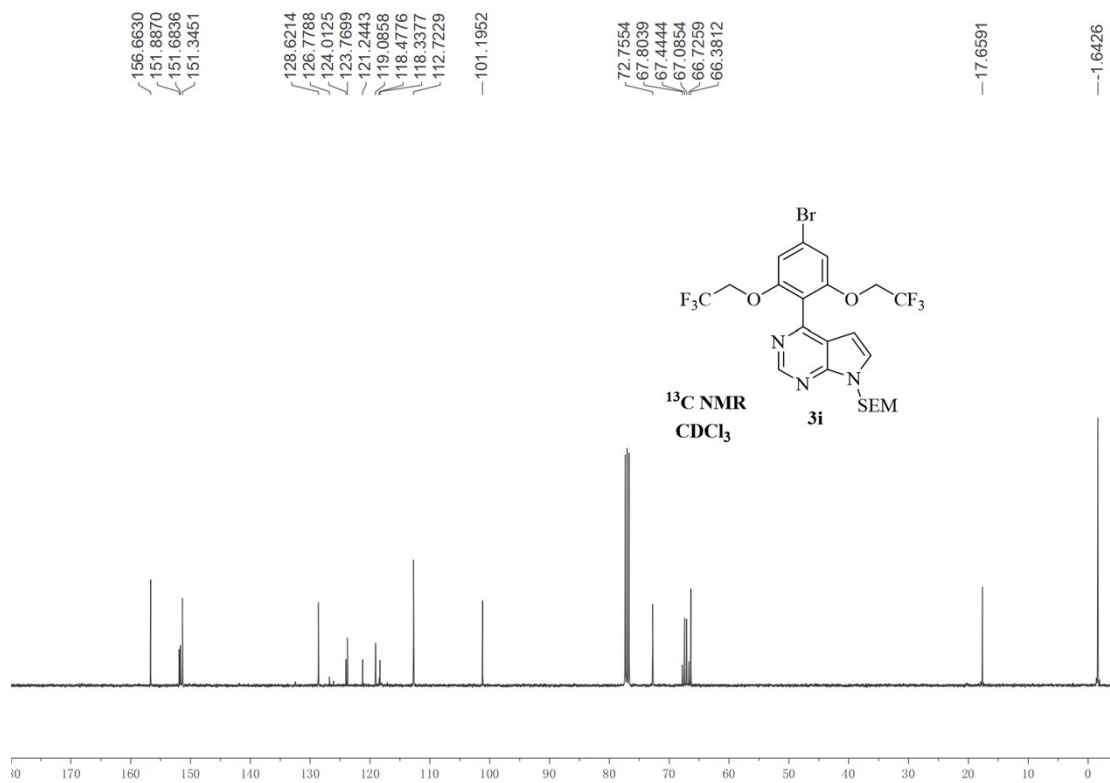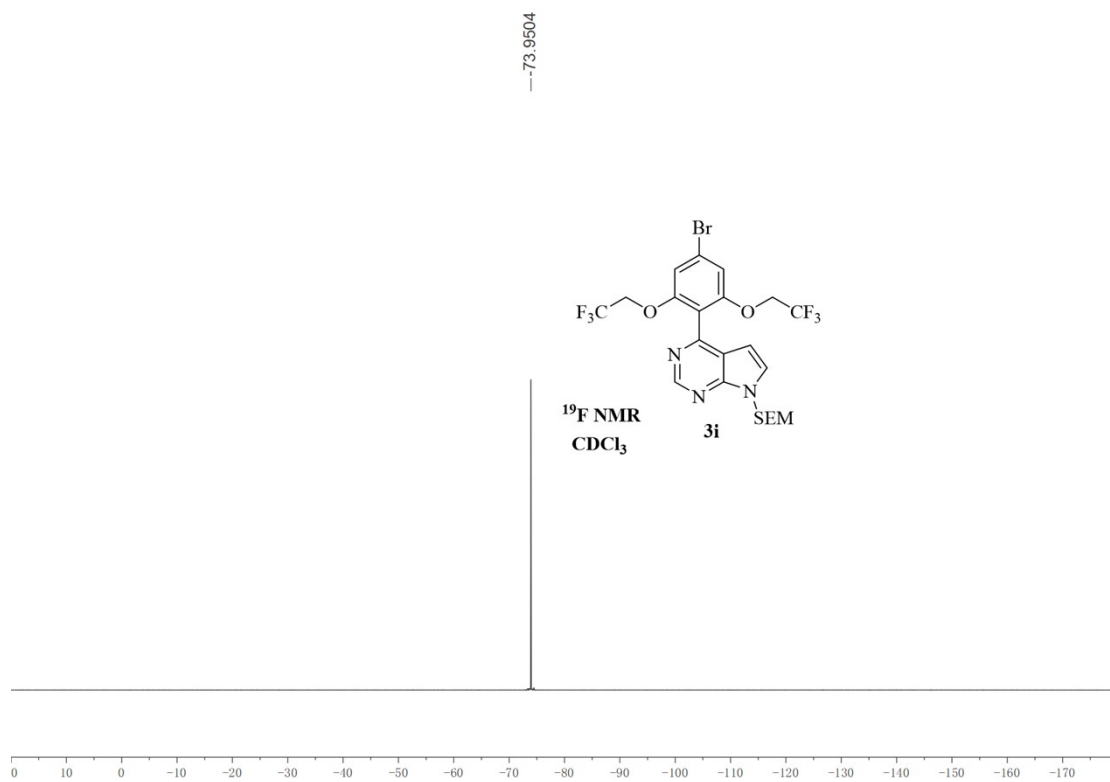

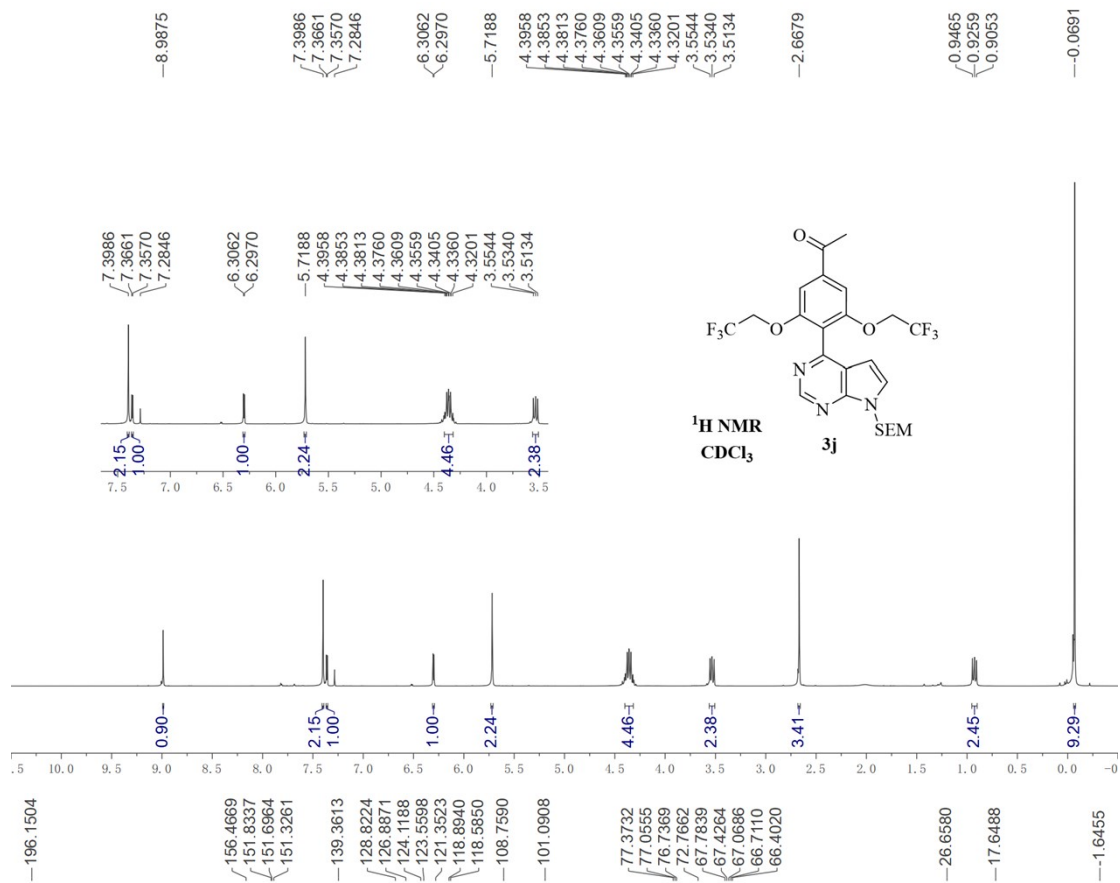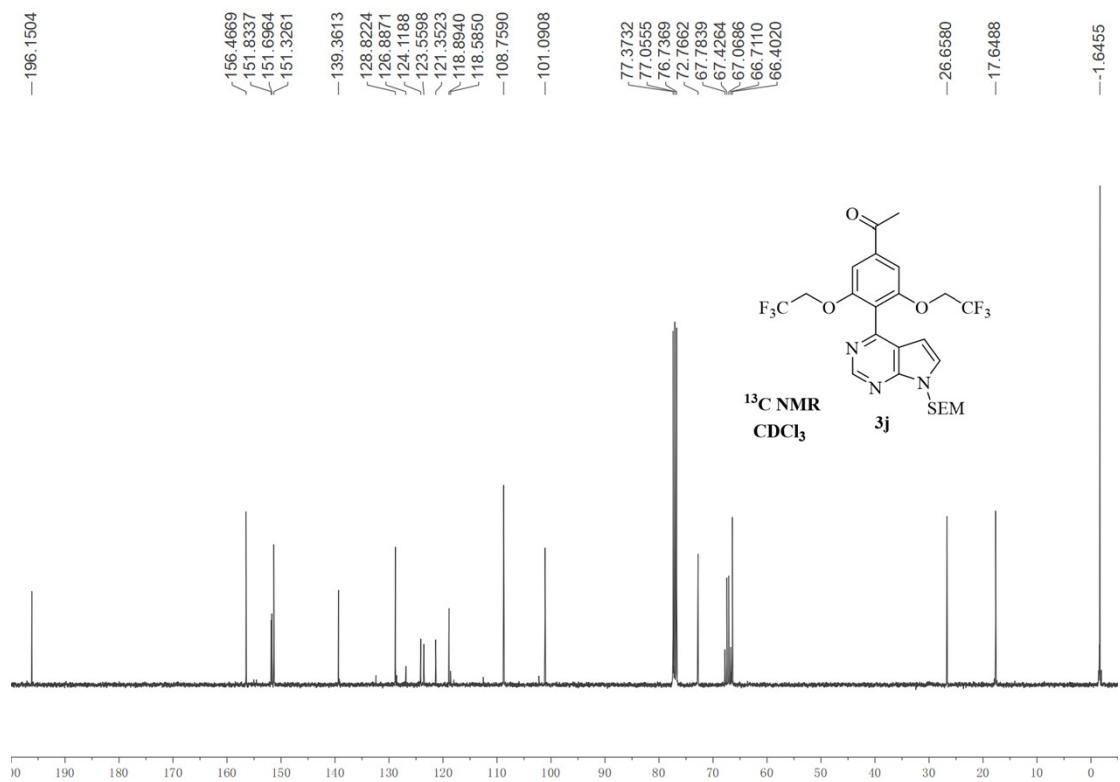

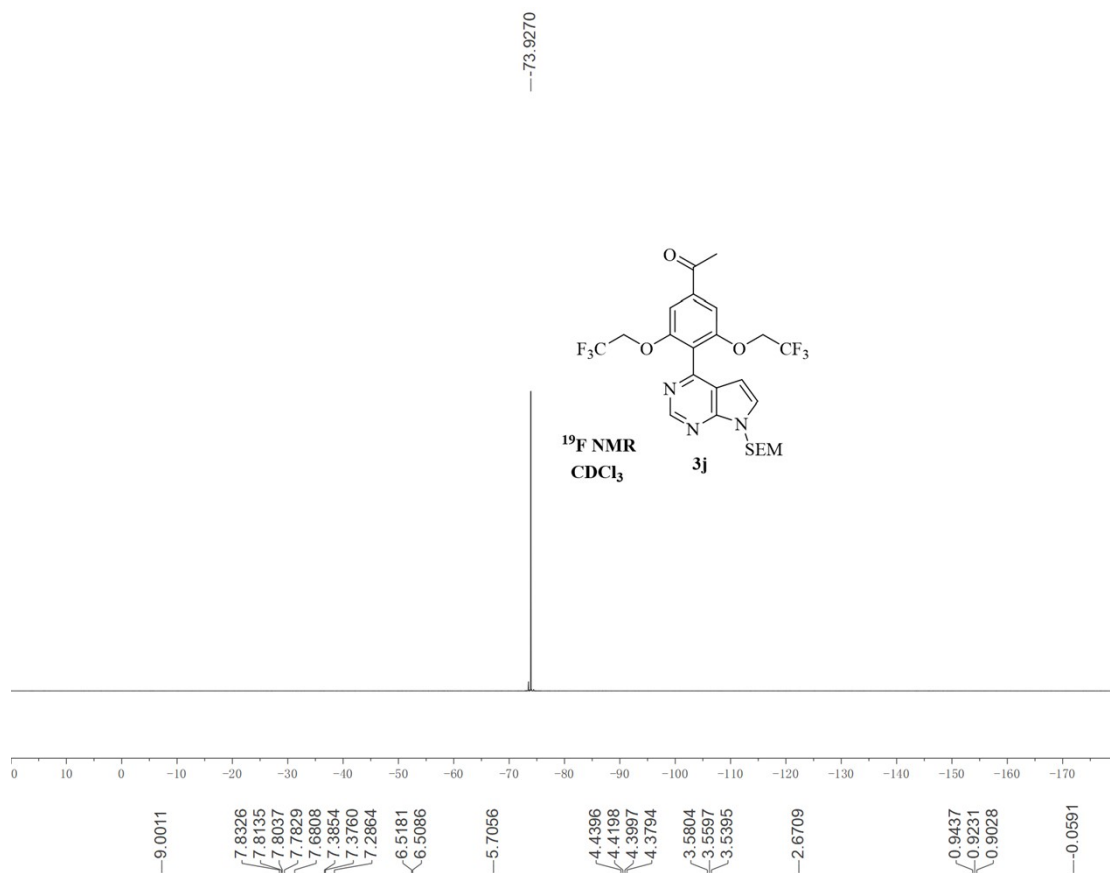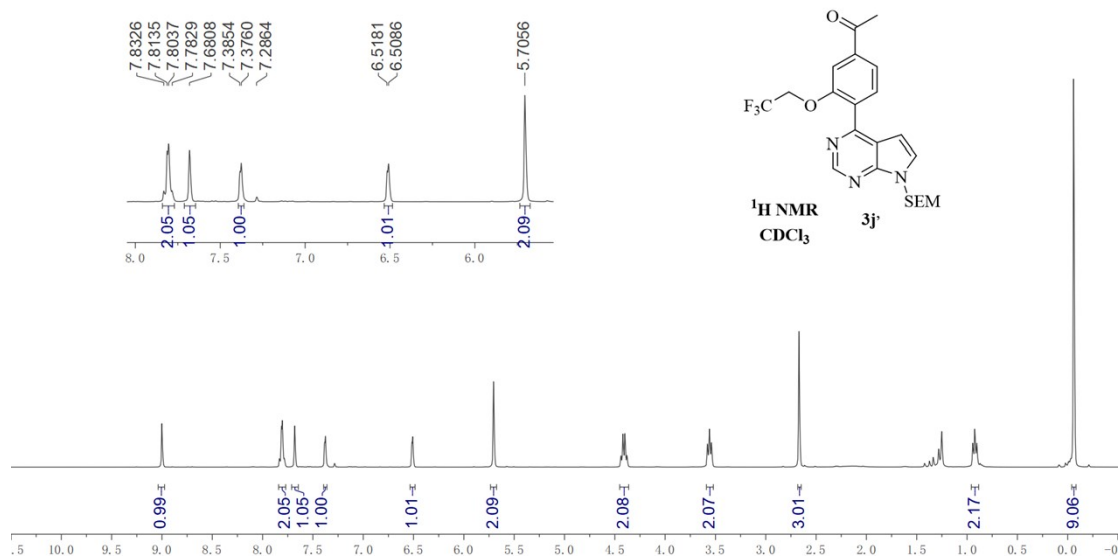



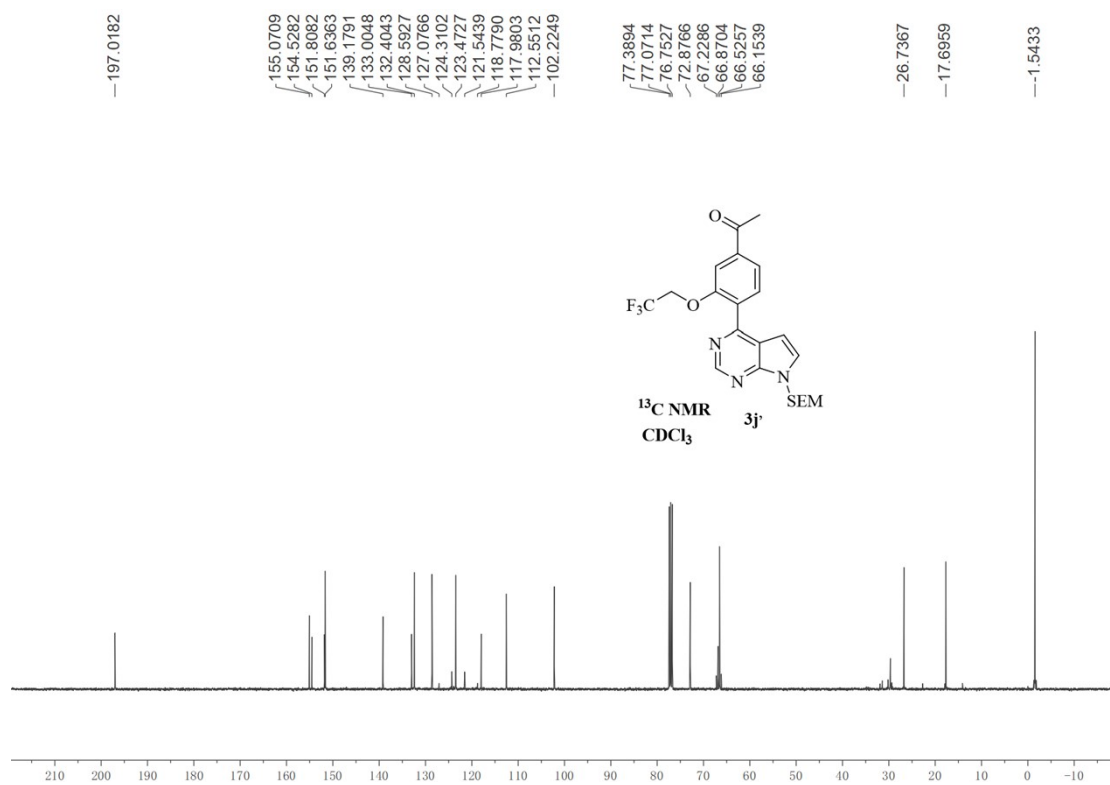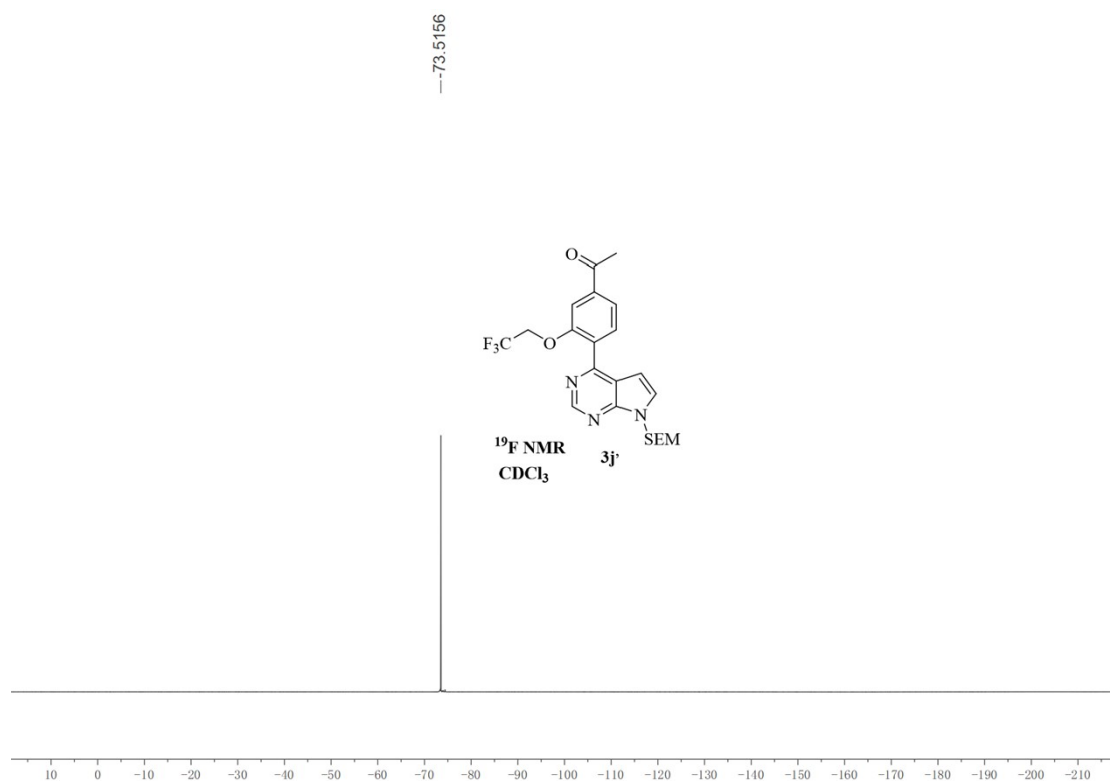

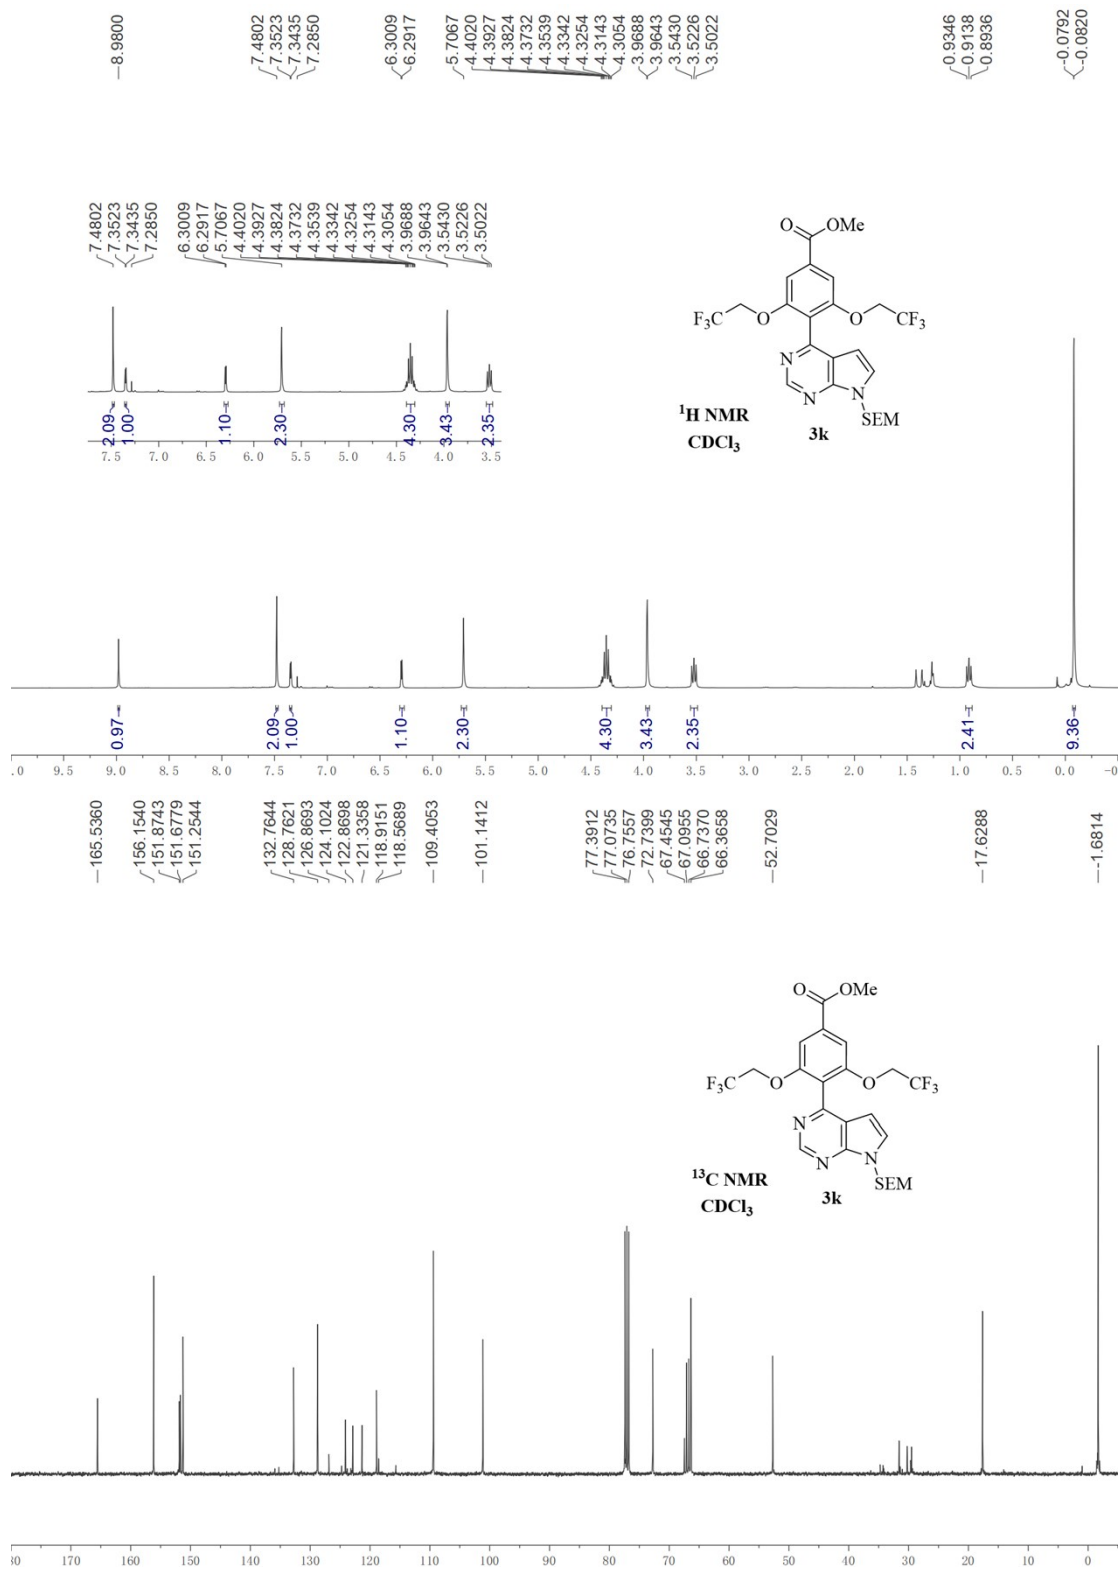

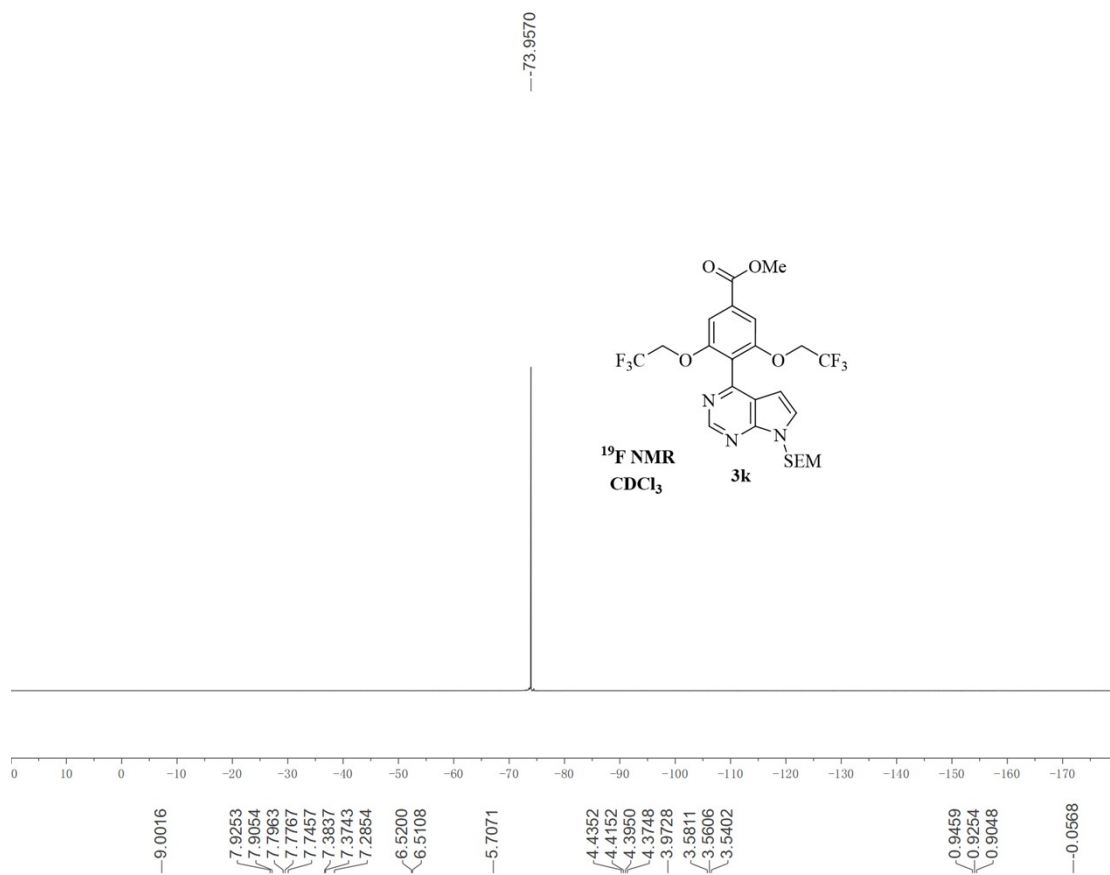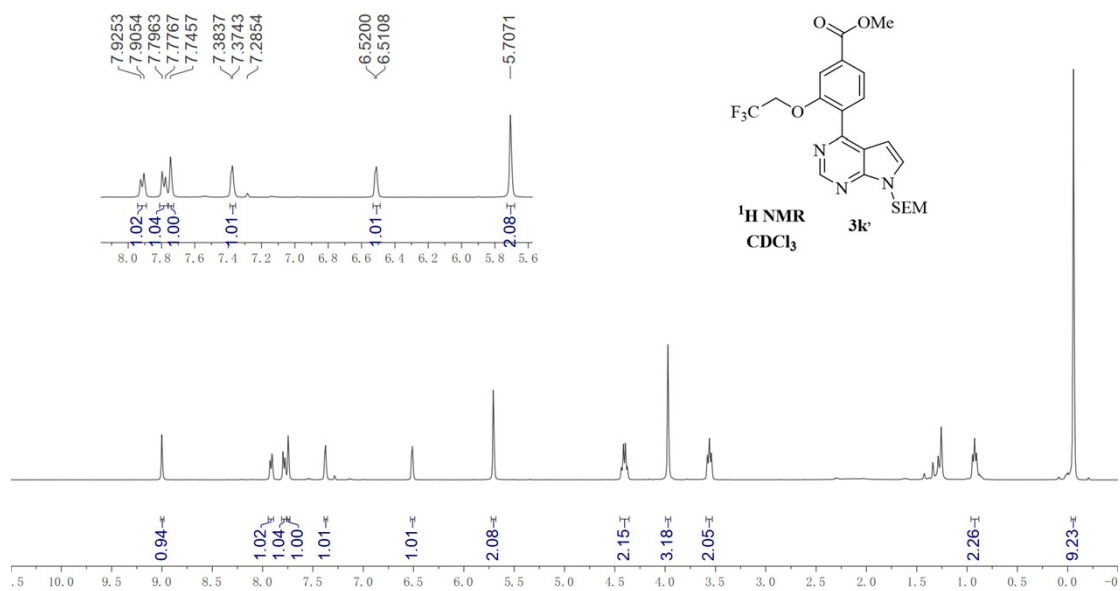

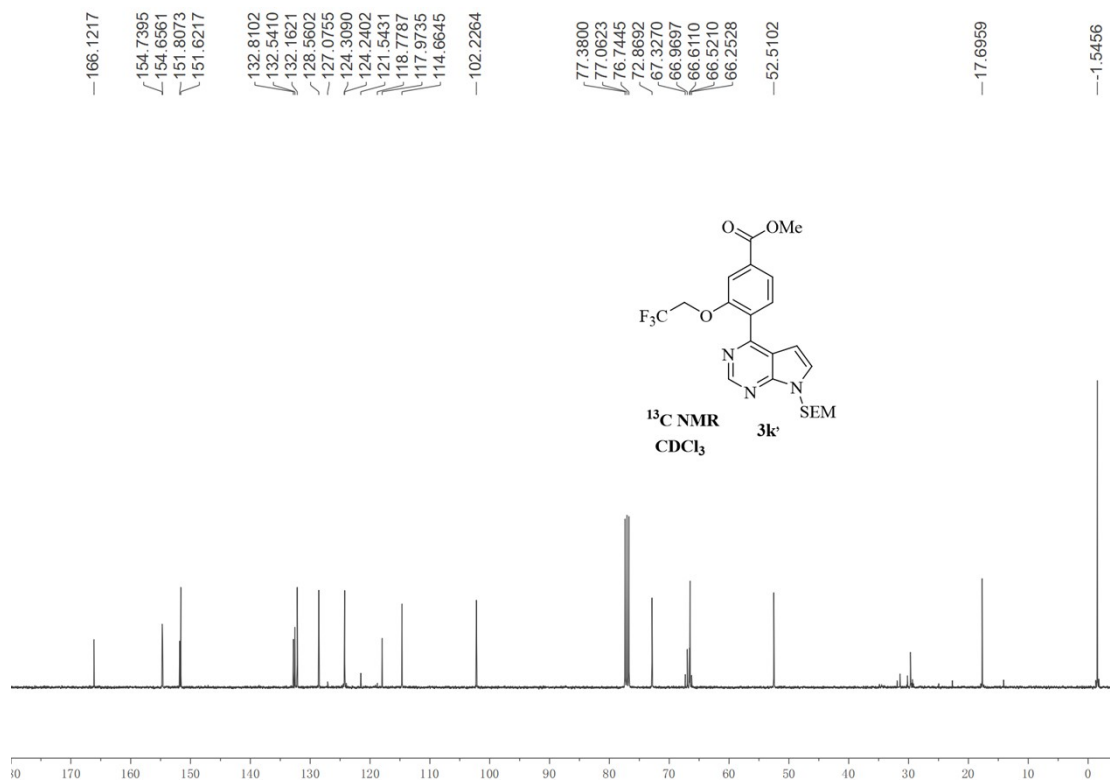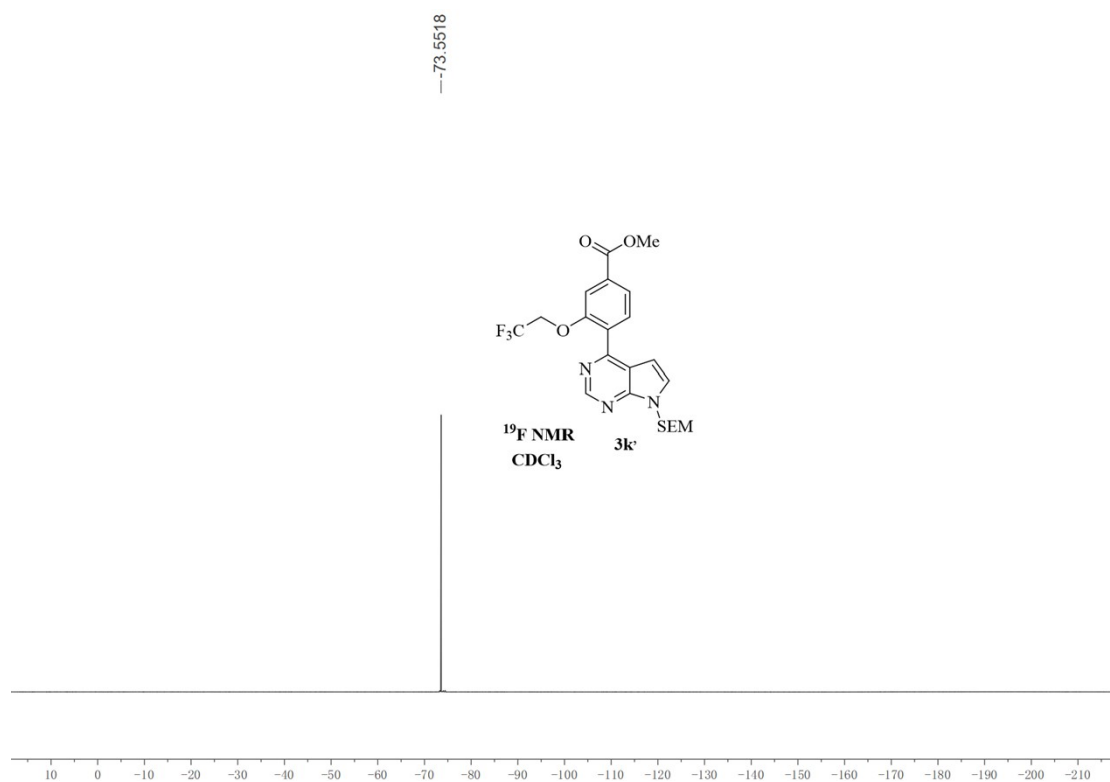

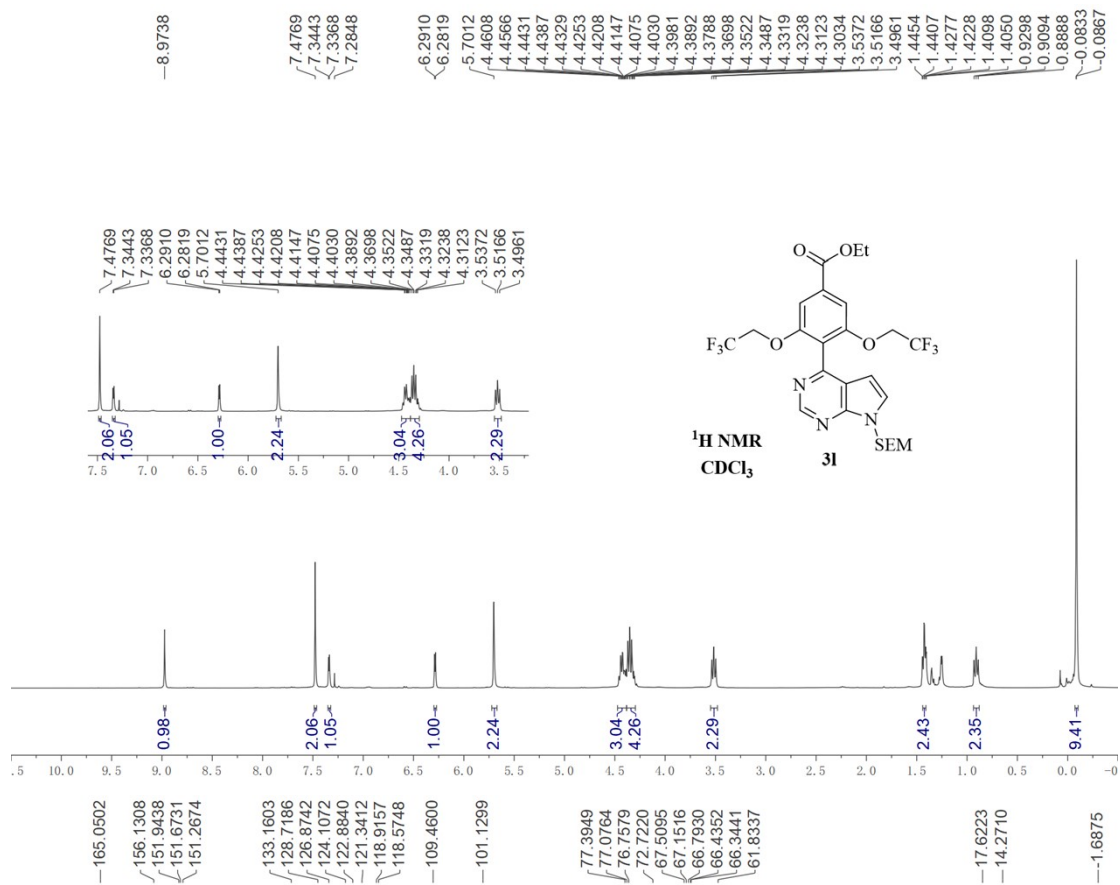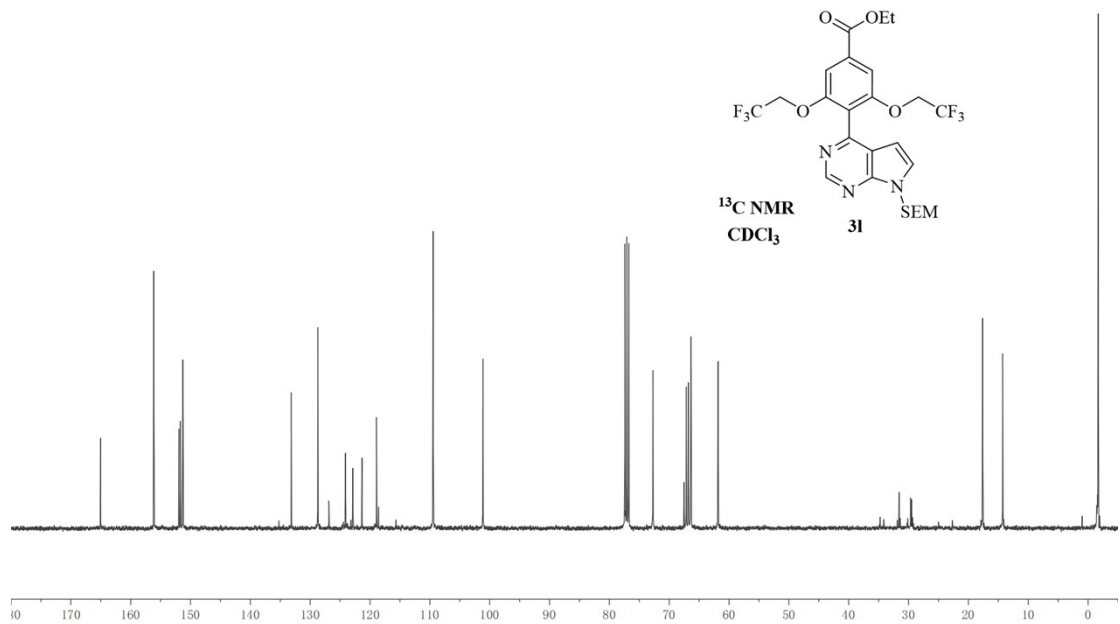

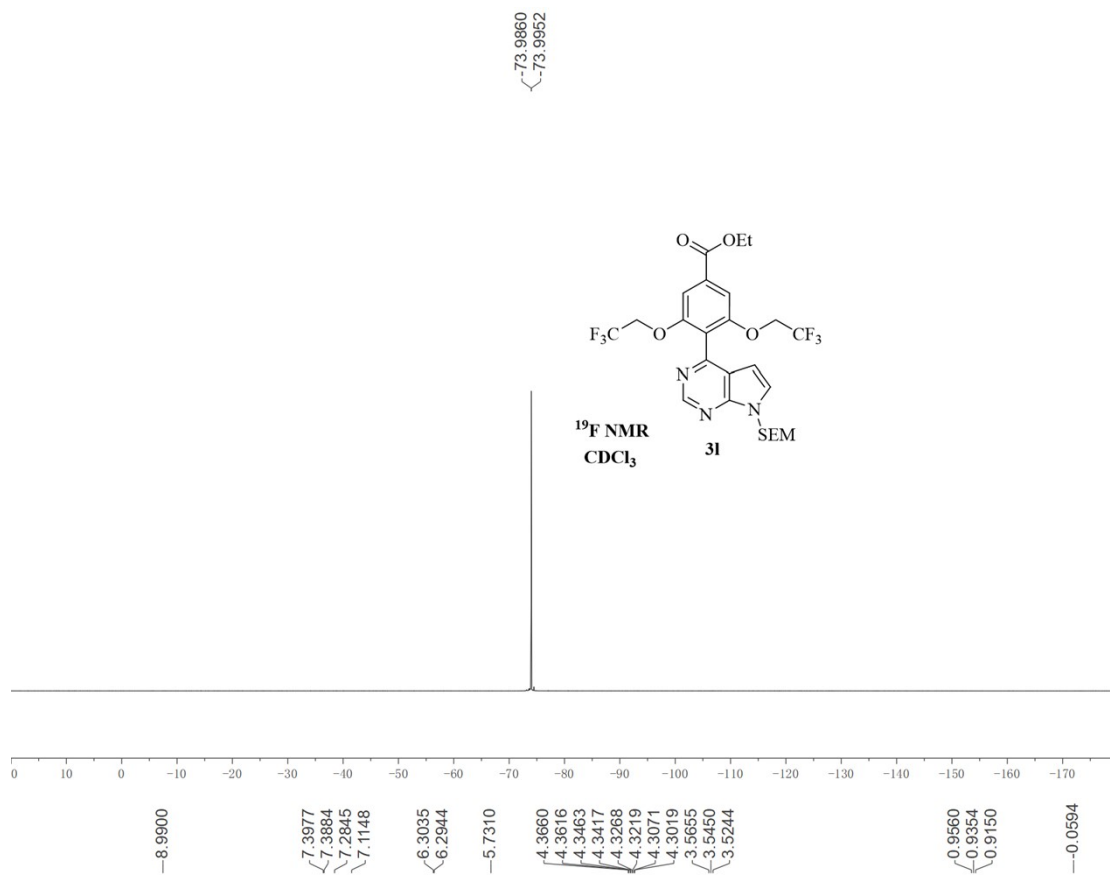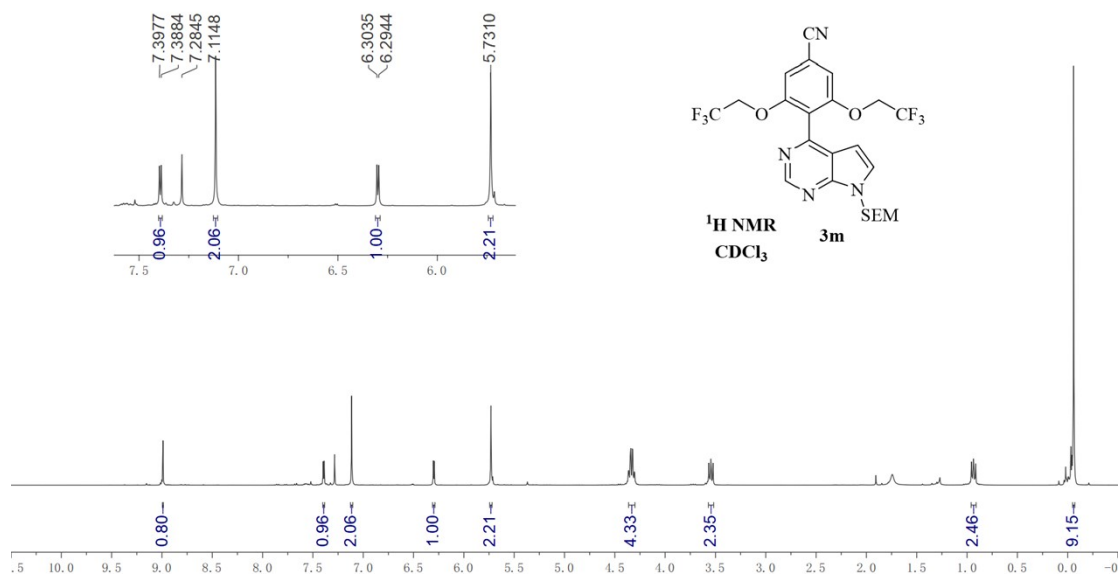

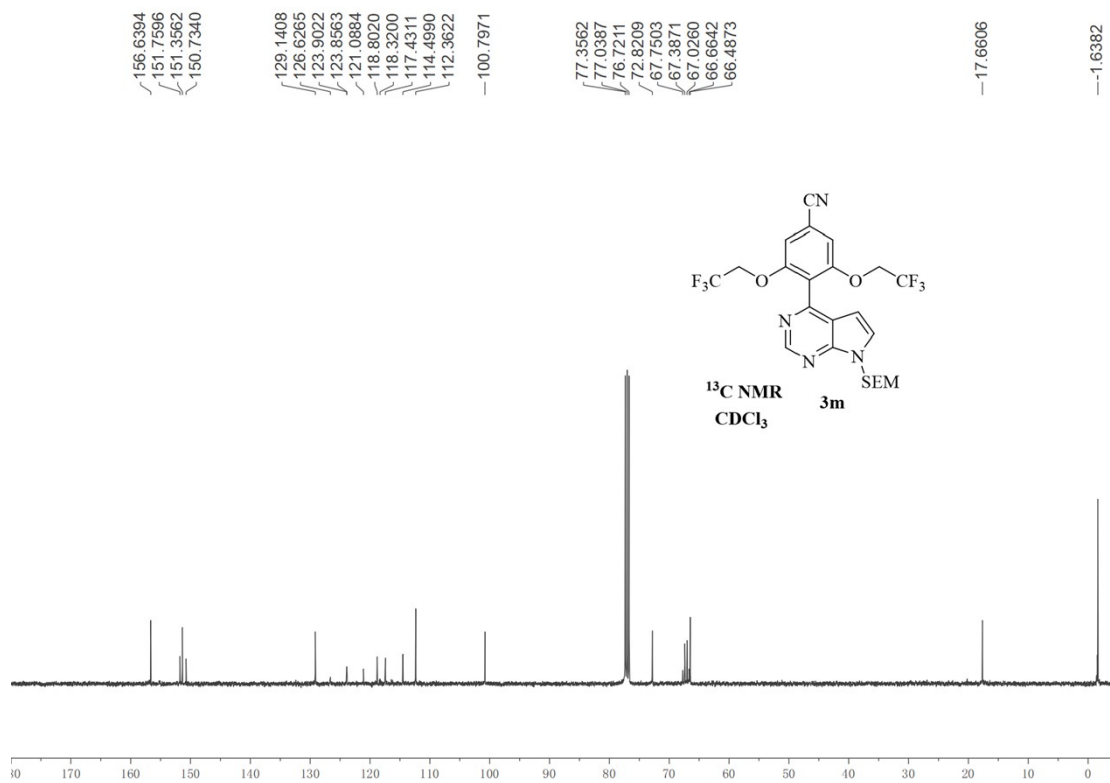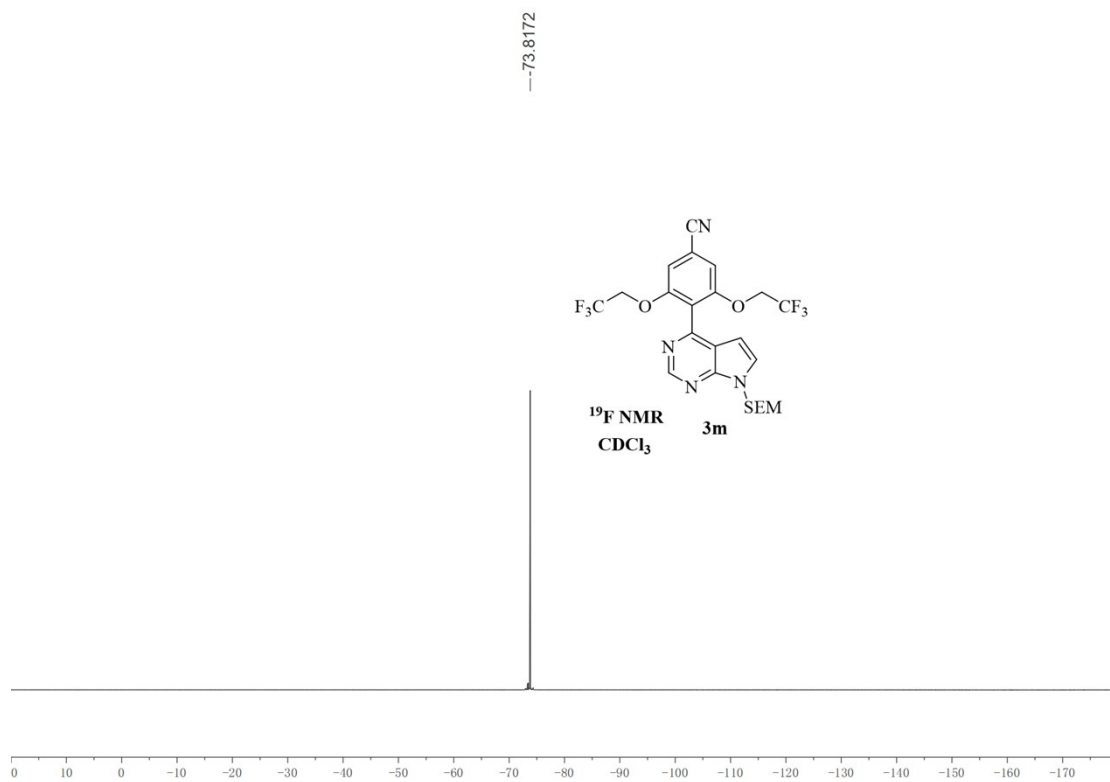

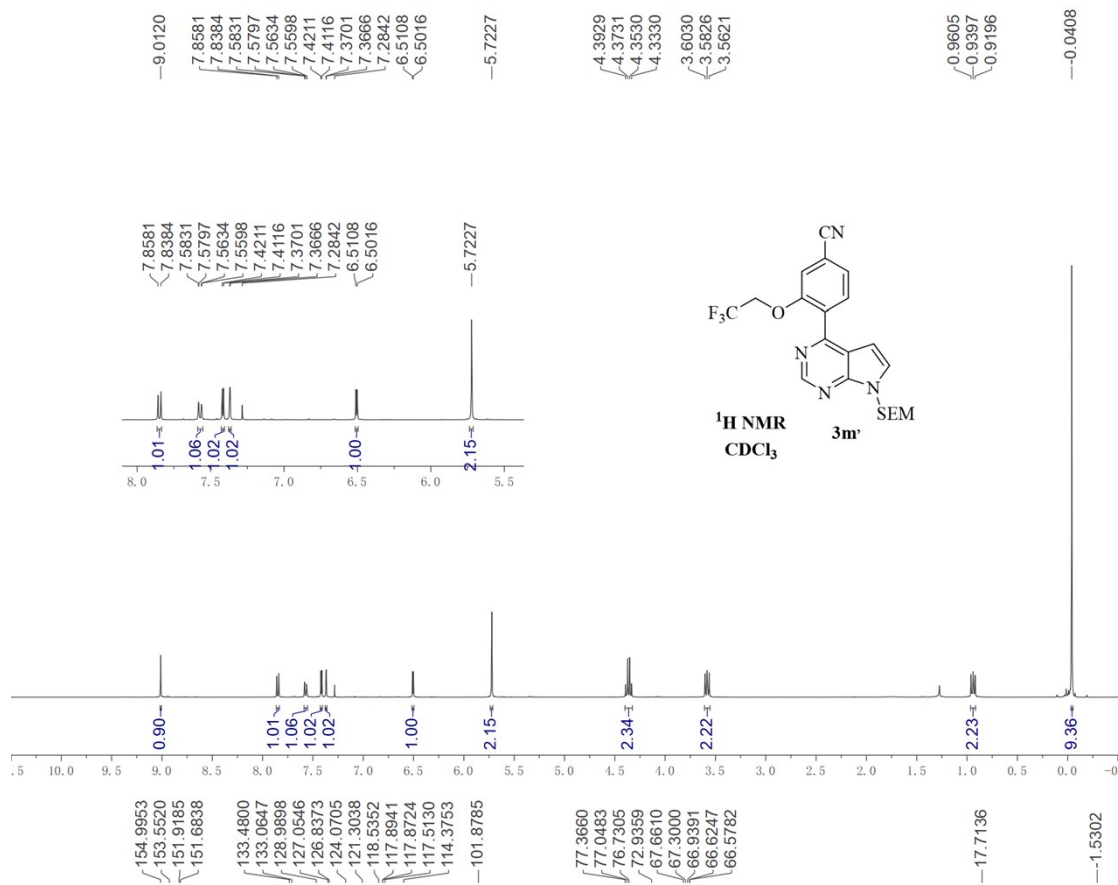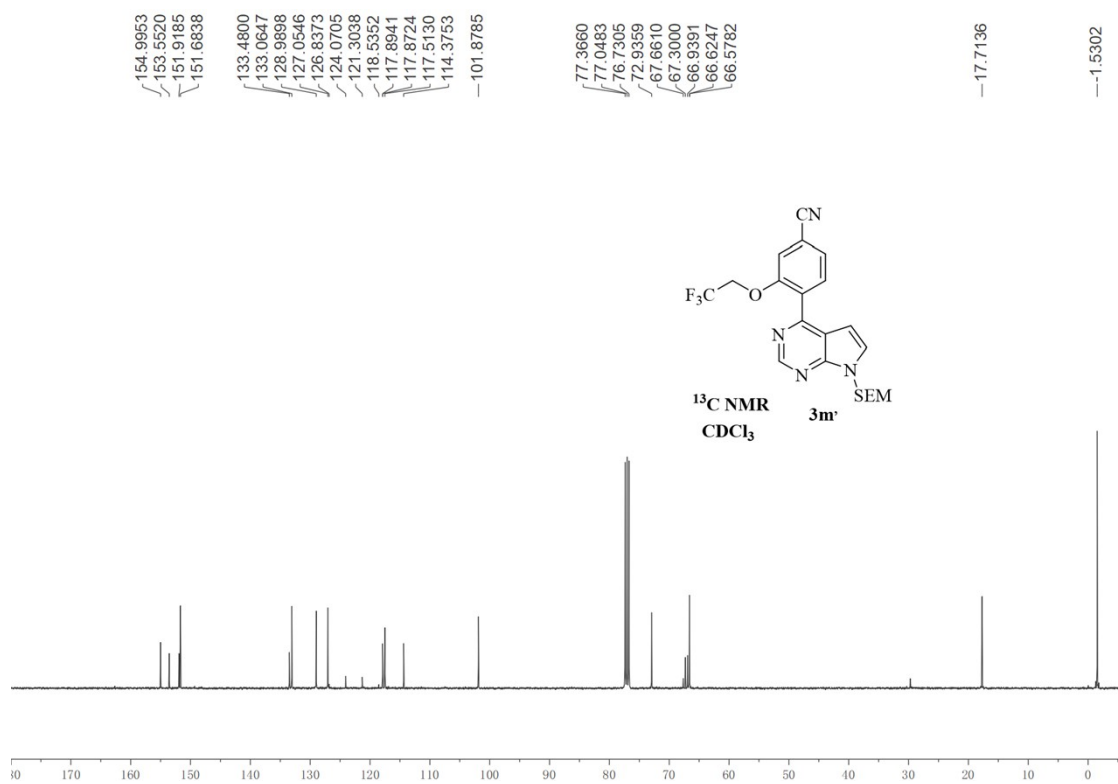



-73.4439

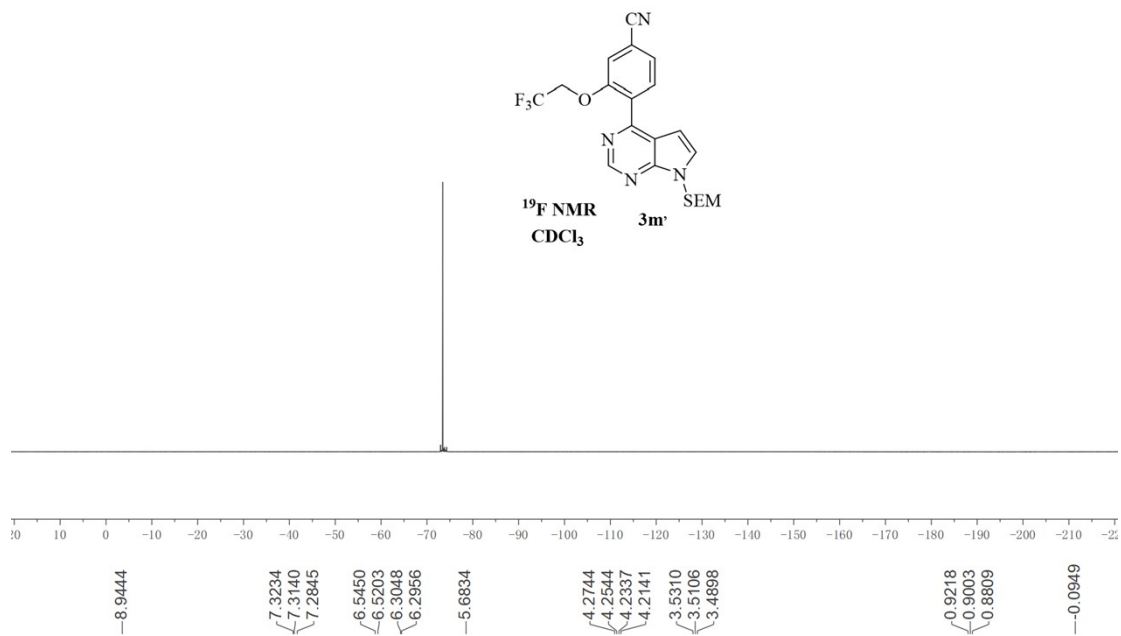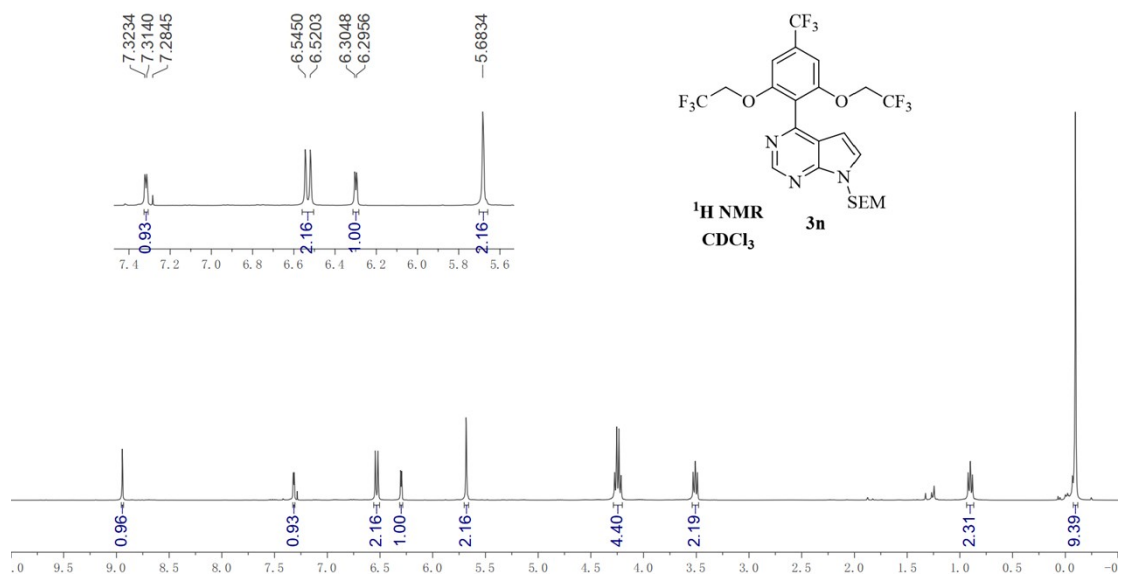

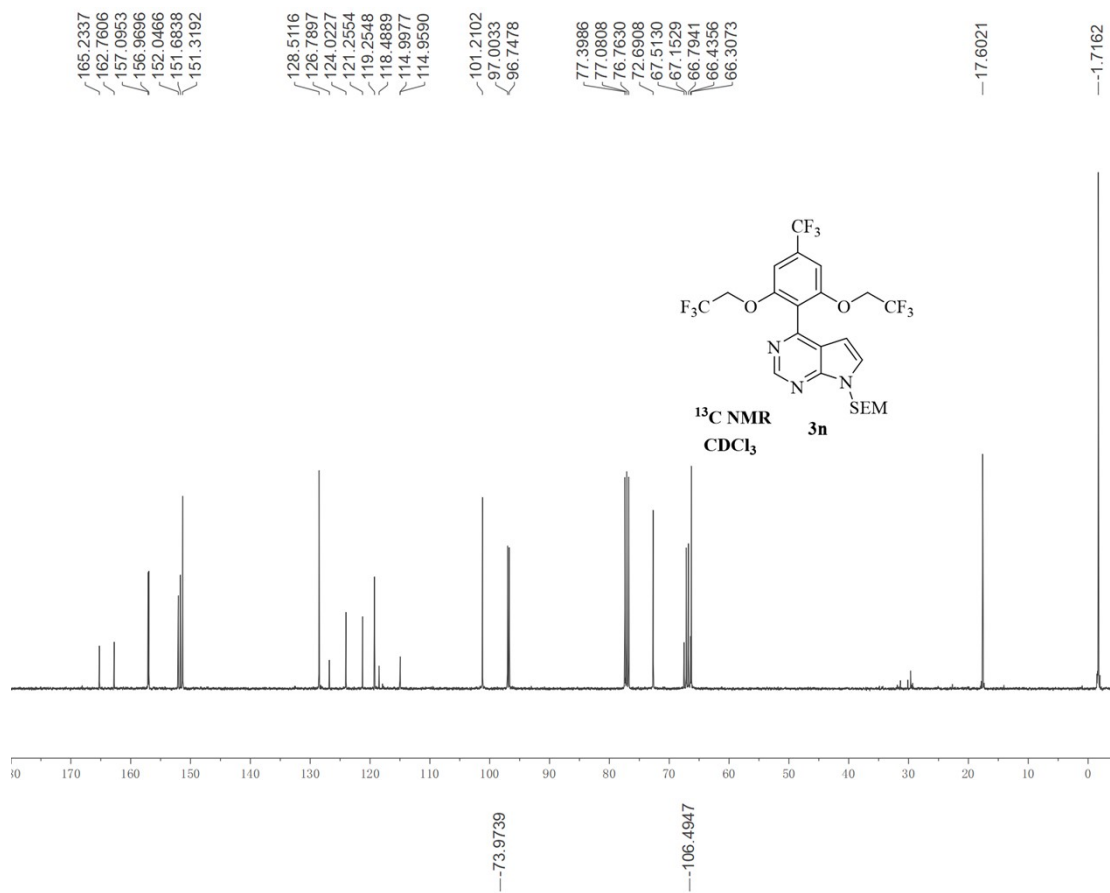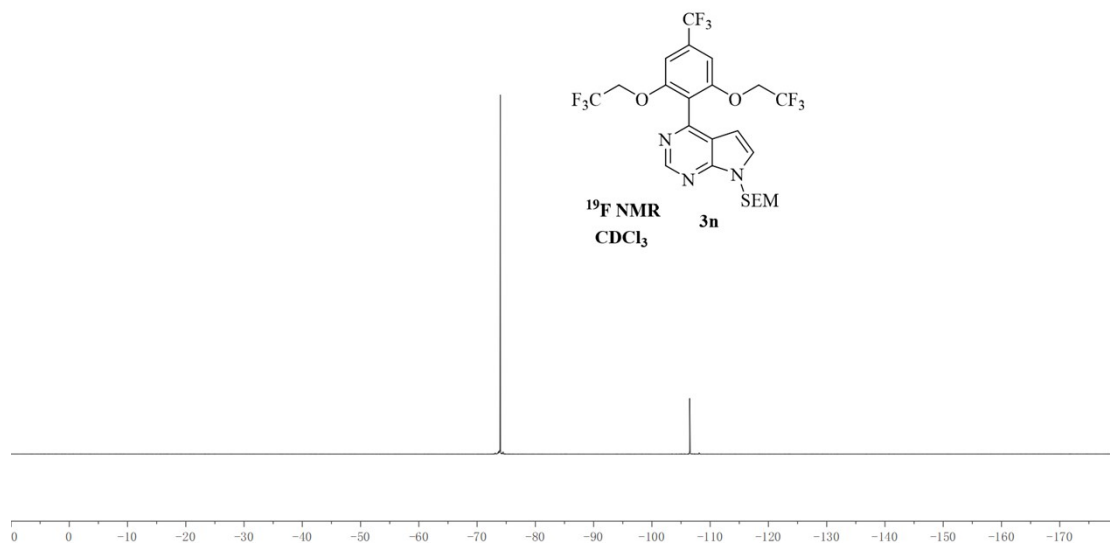

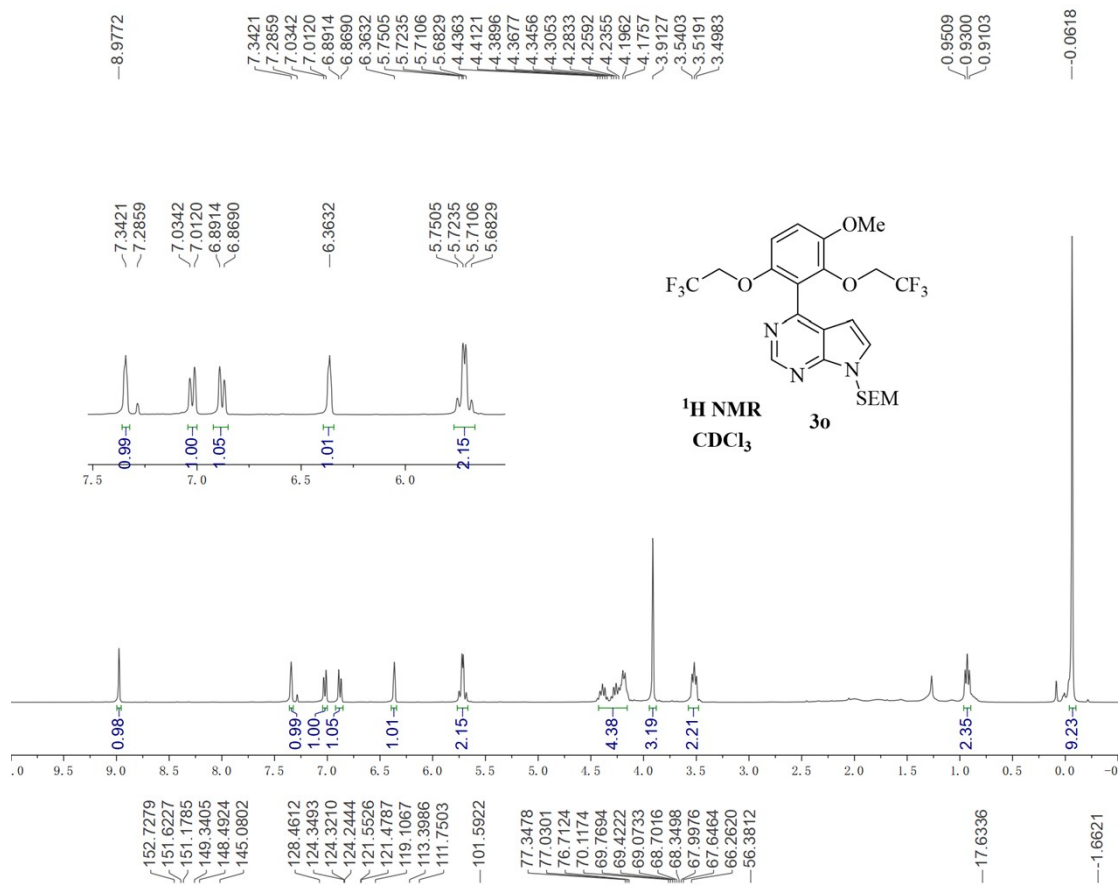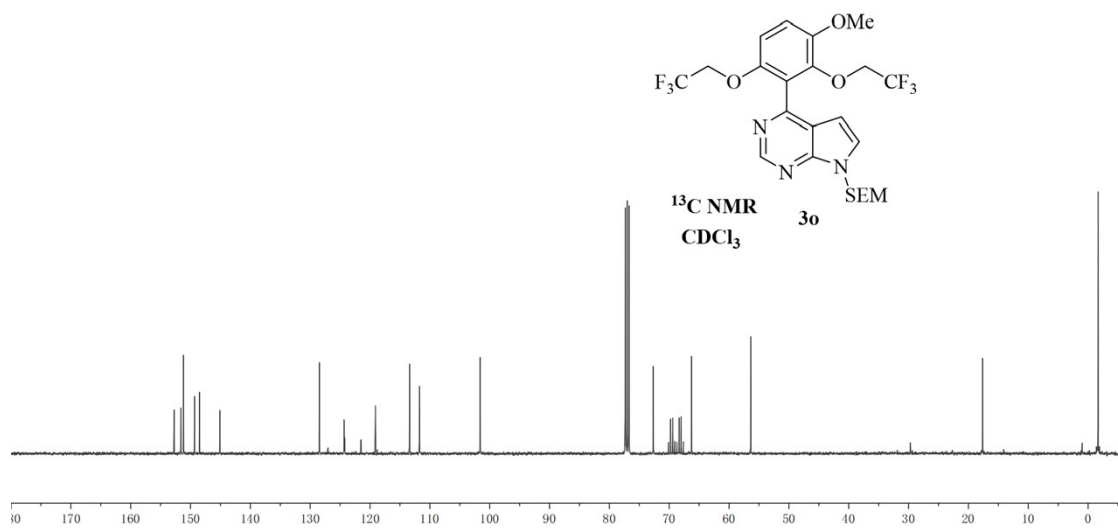

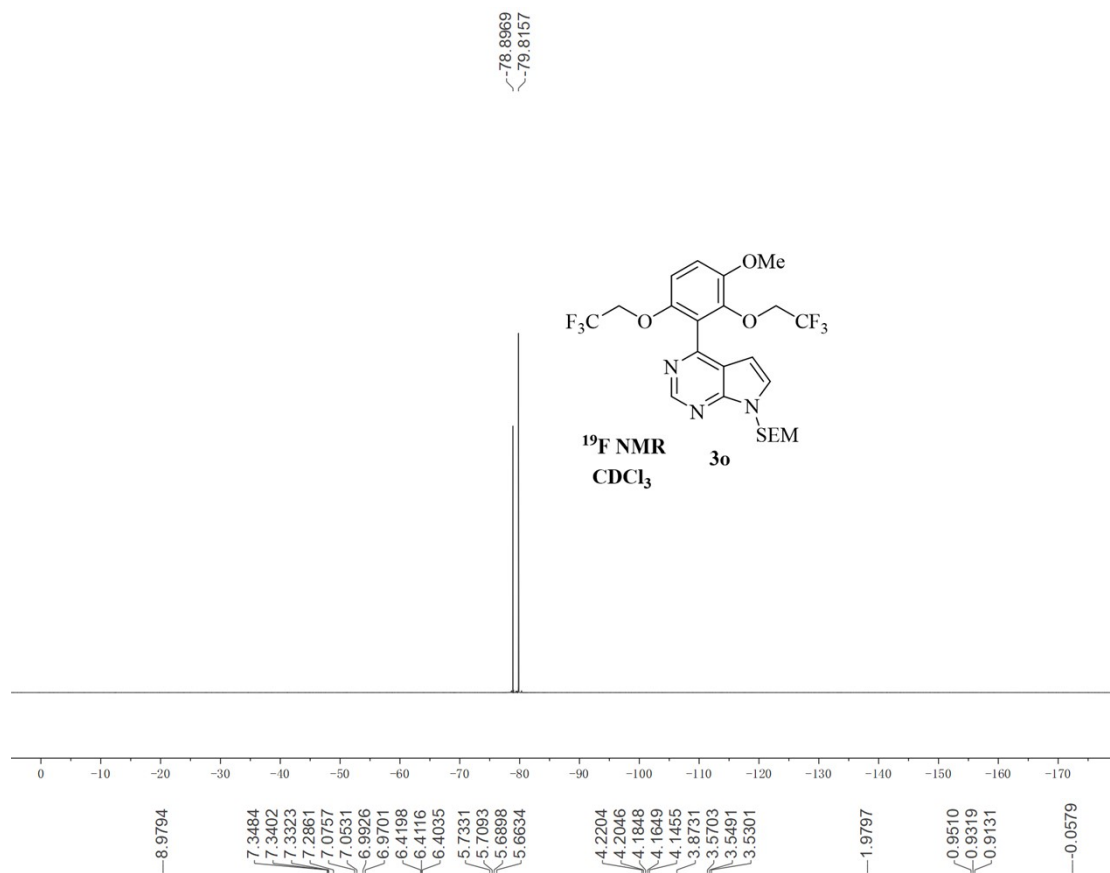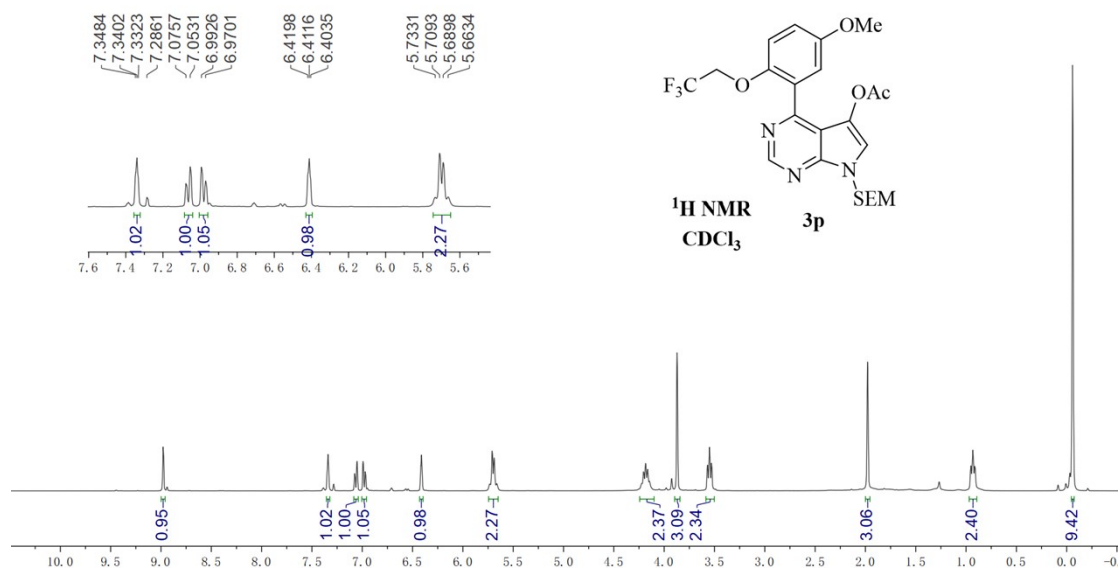

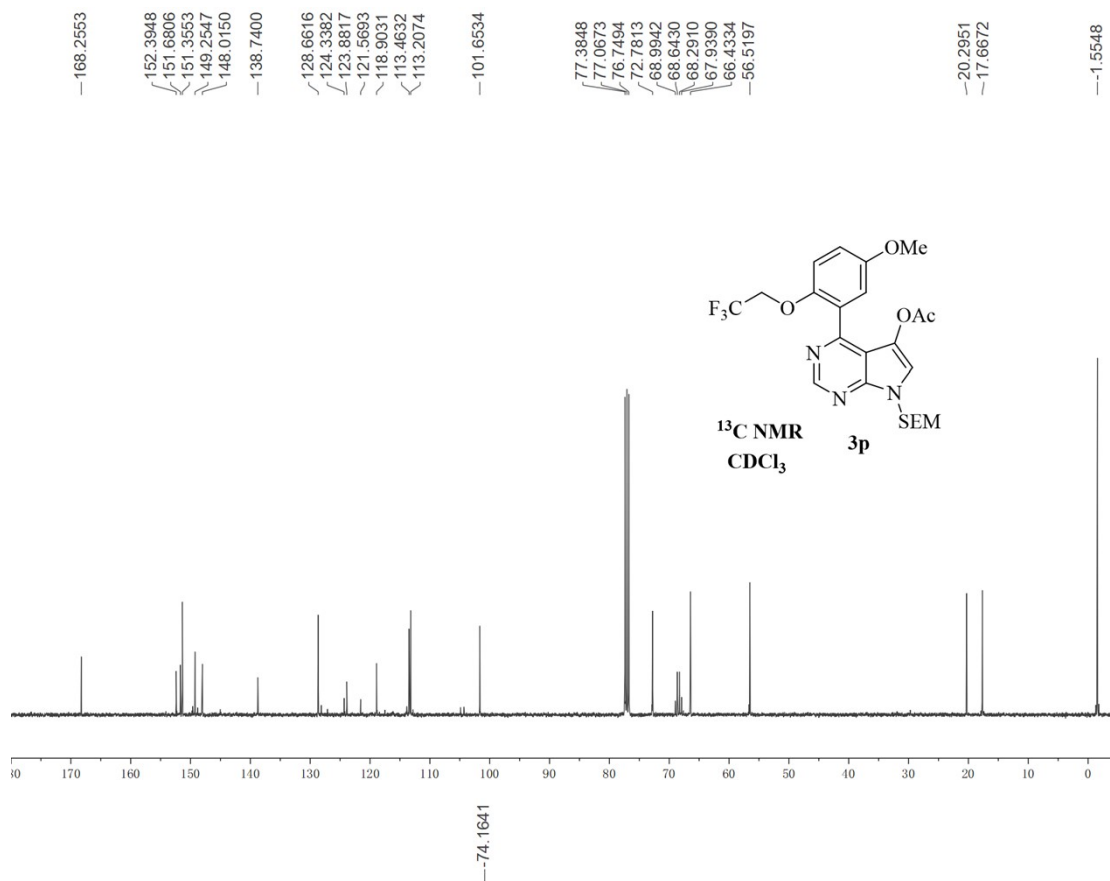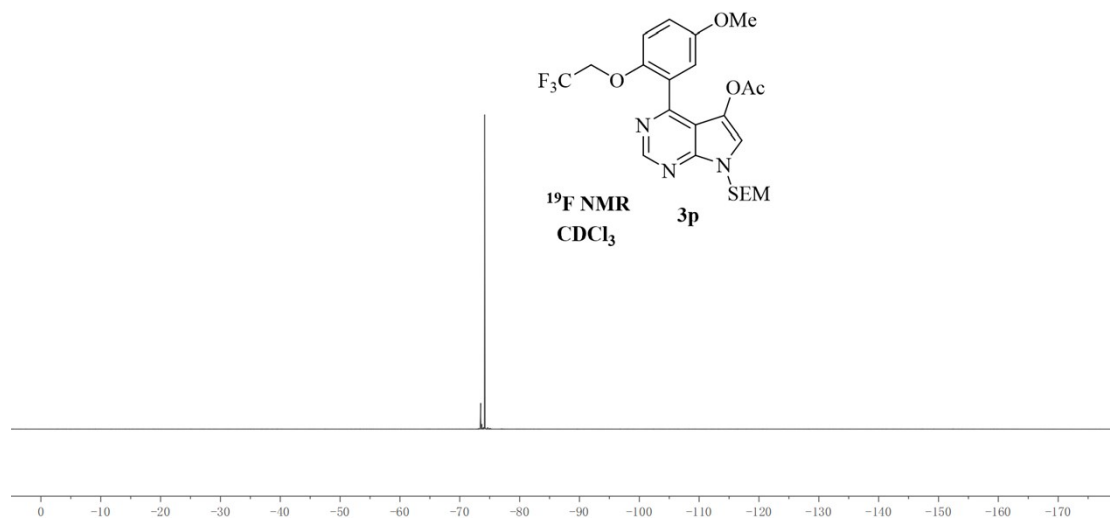

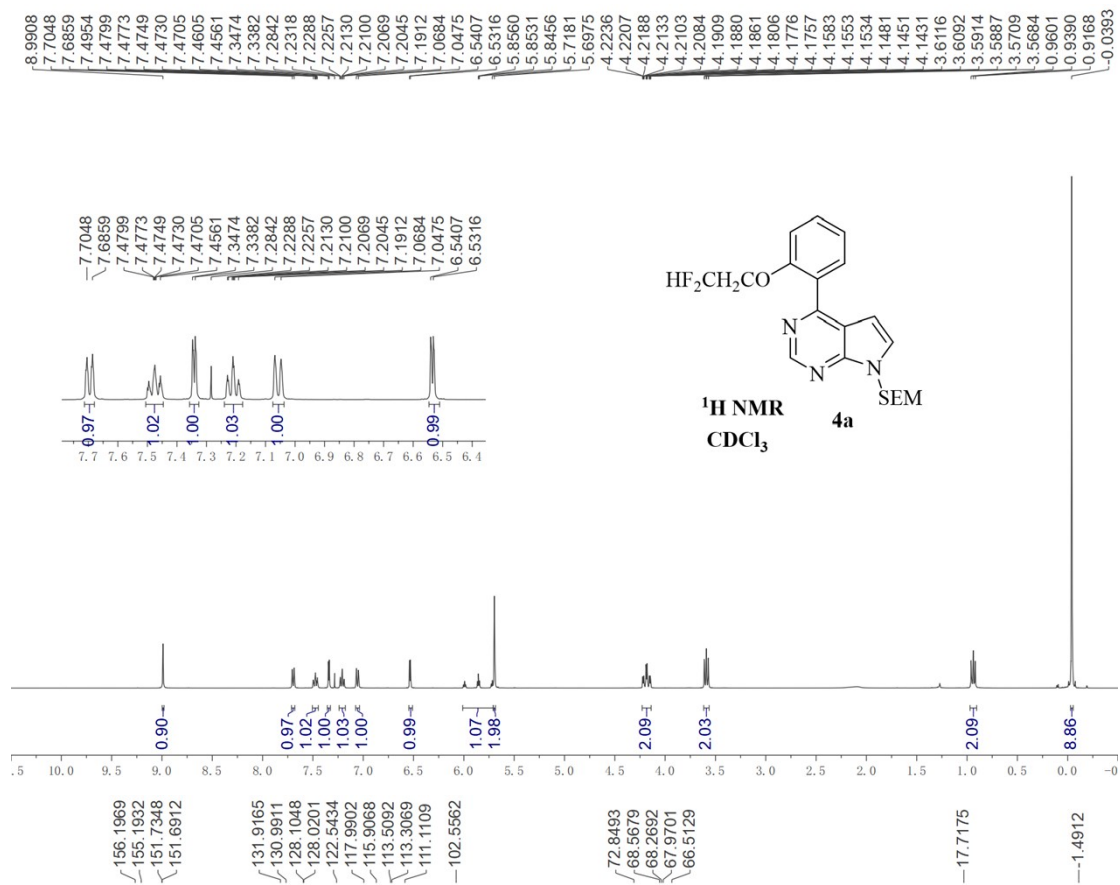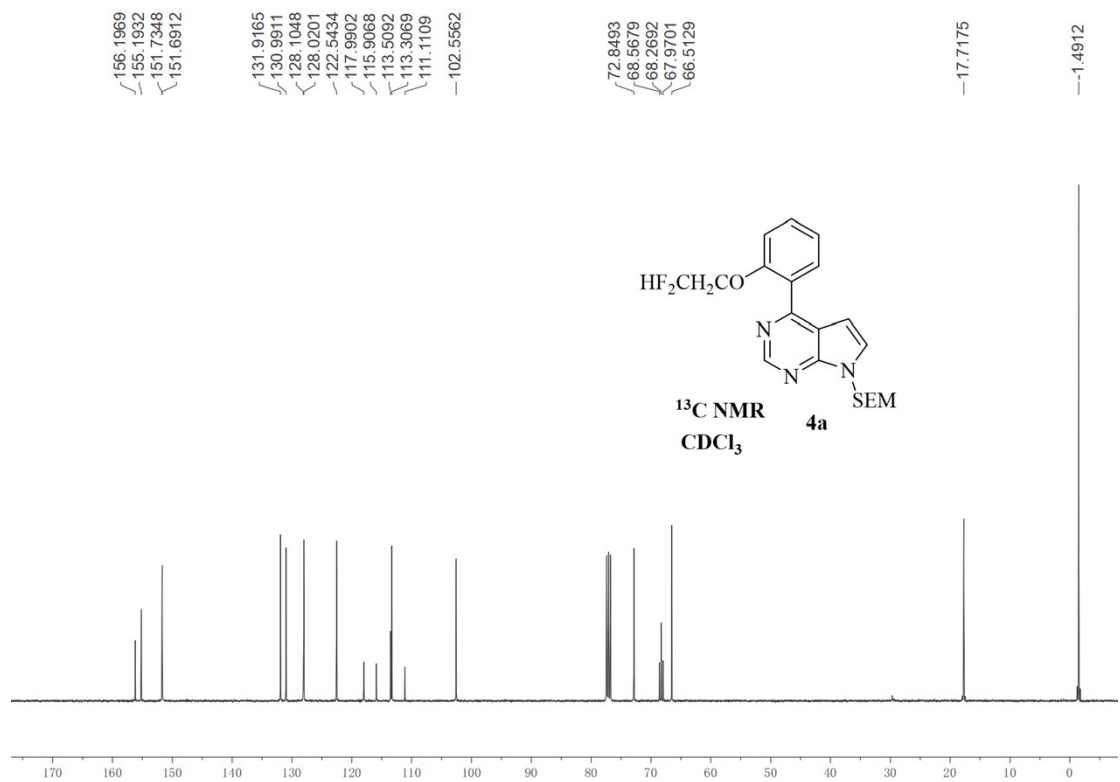

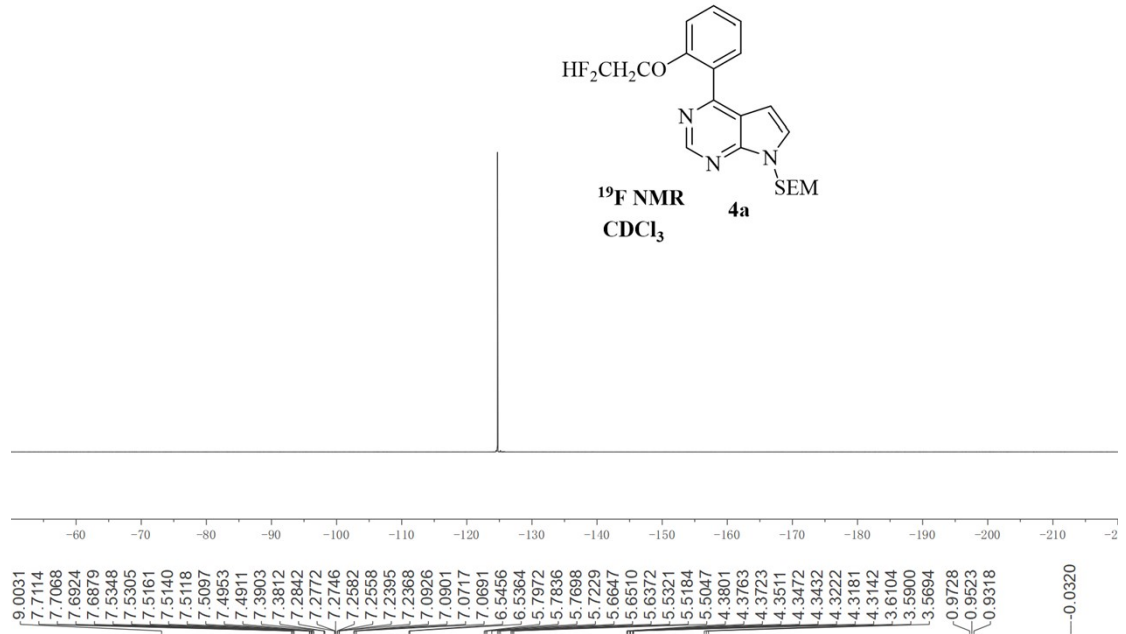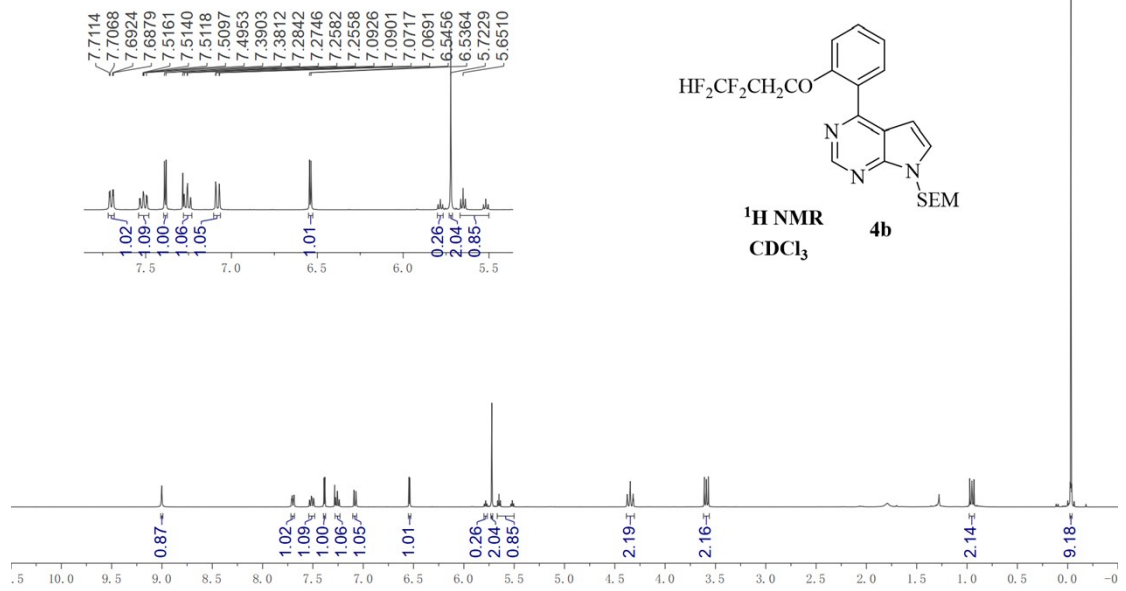

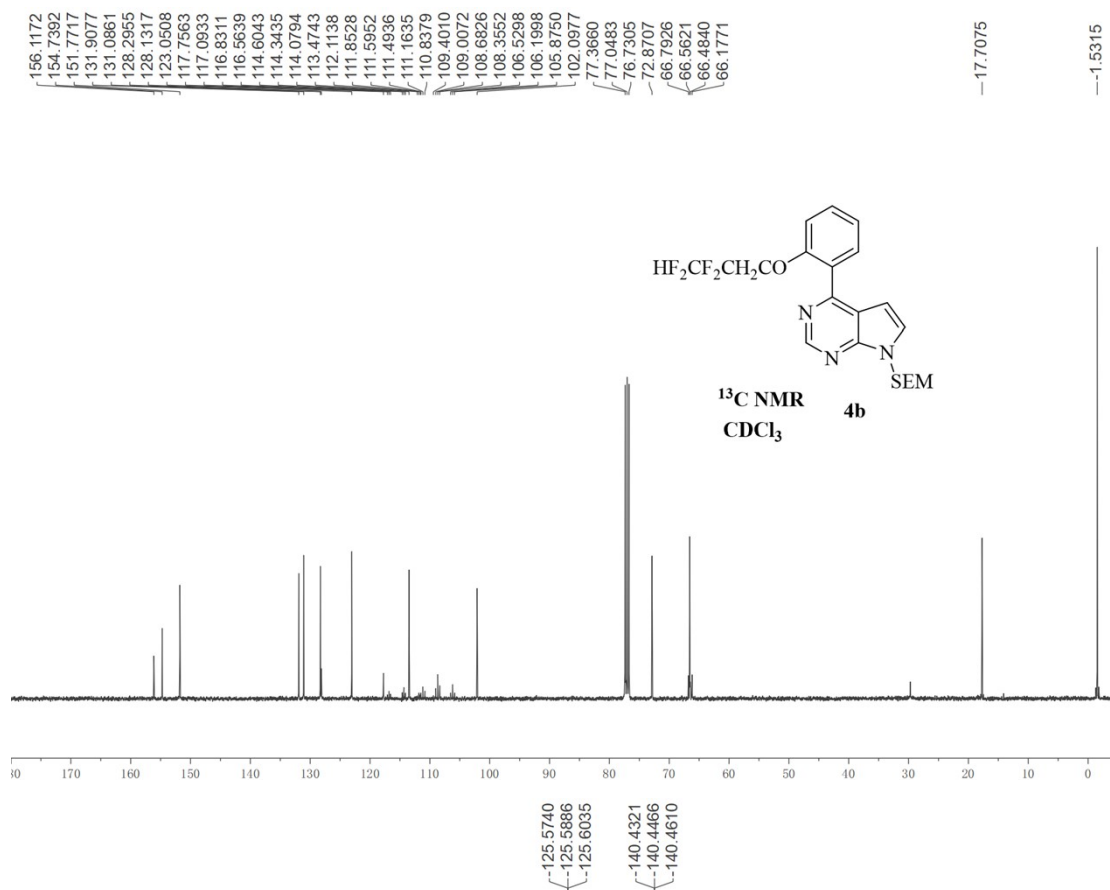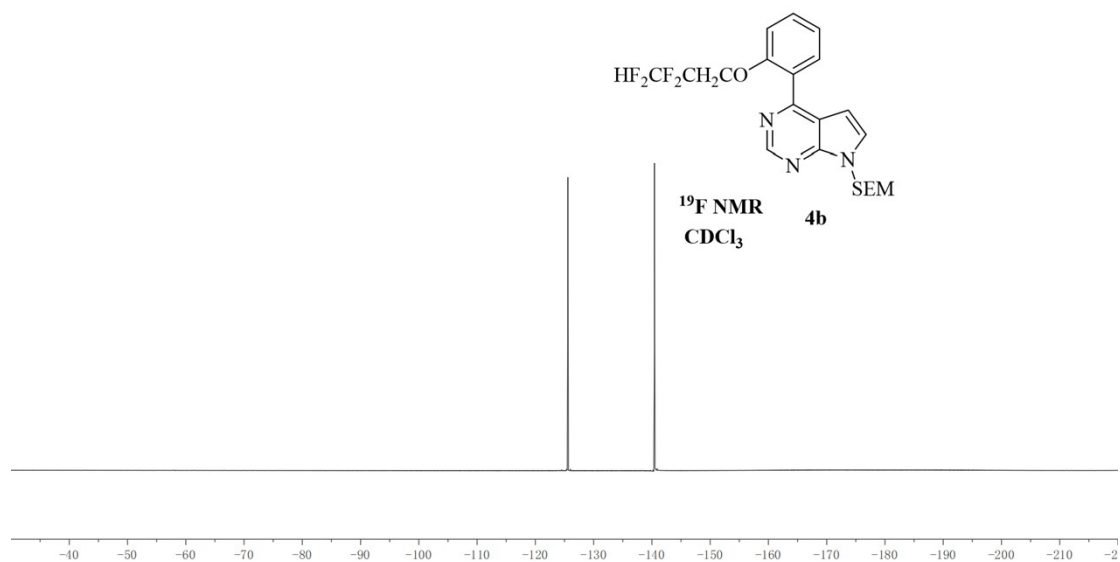



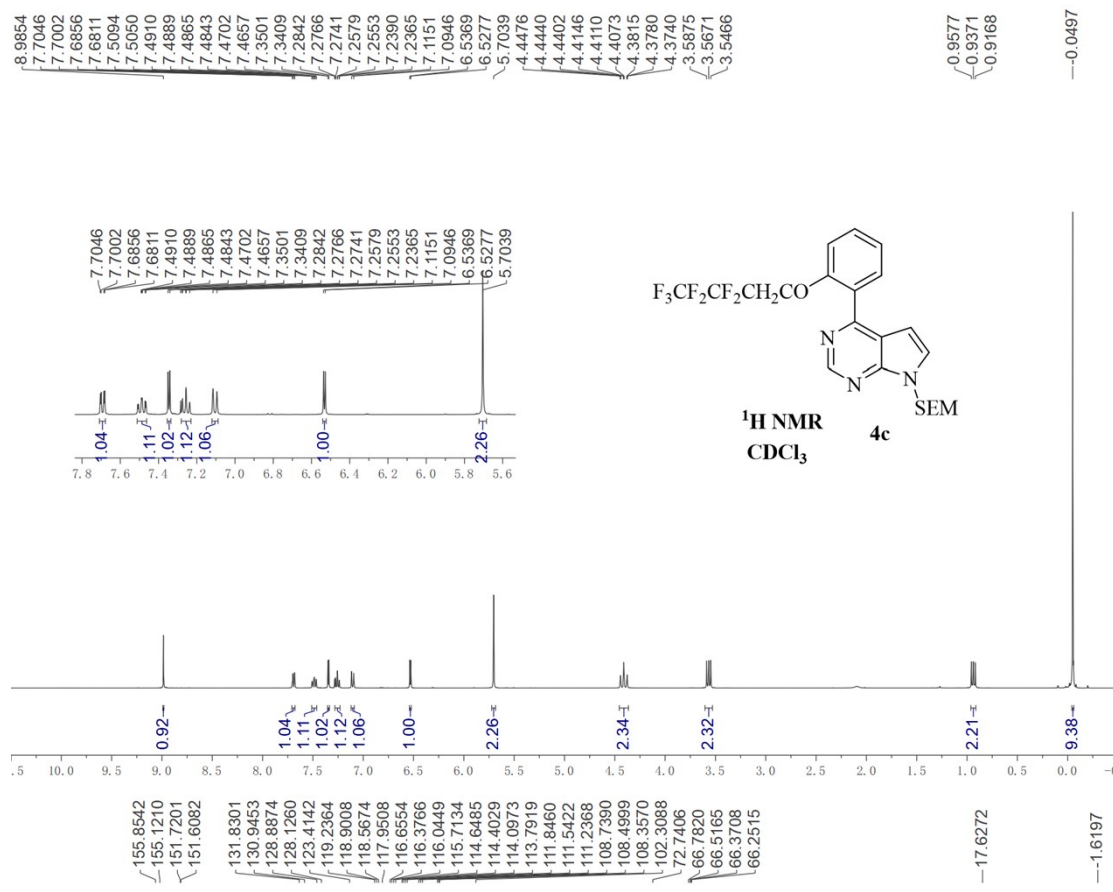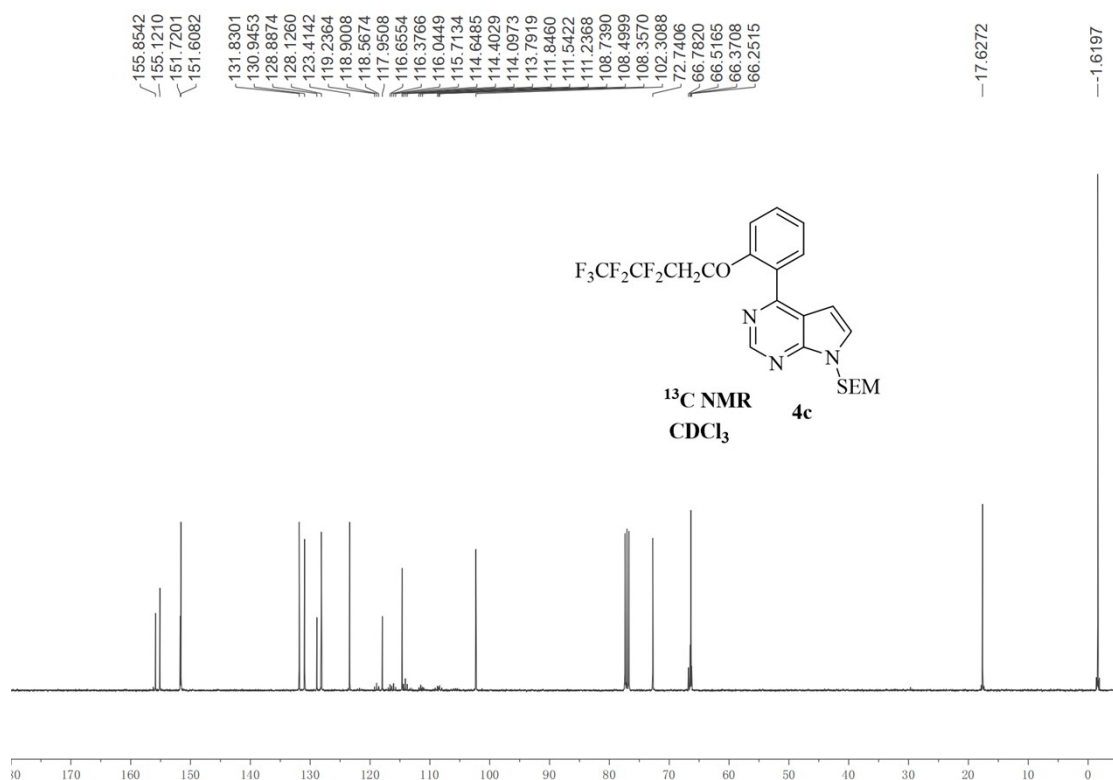

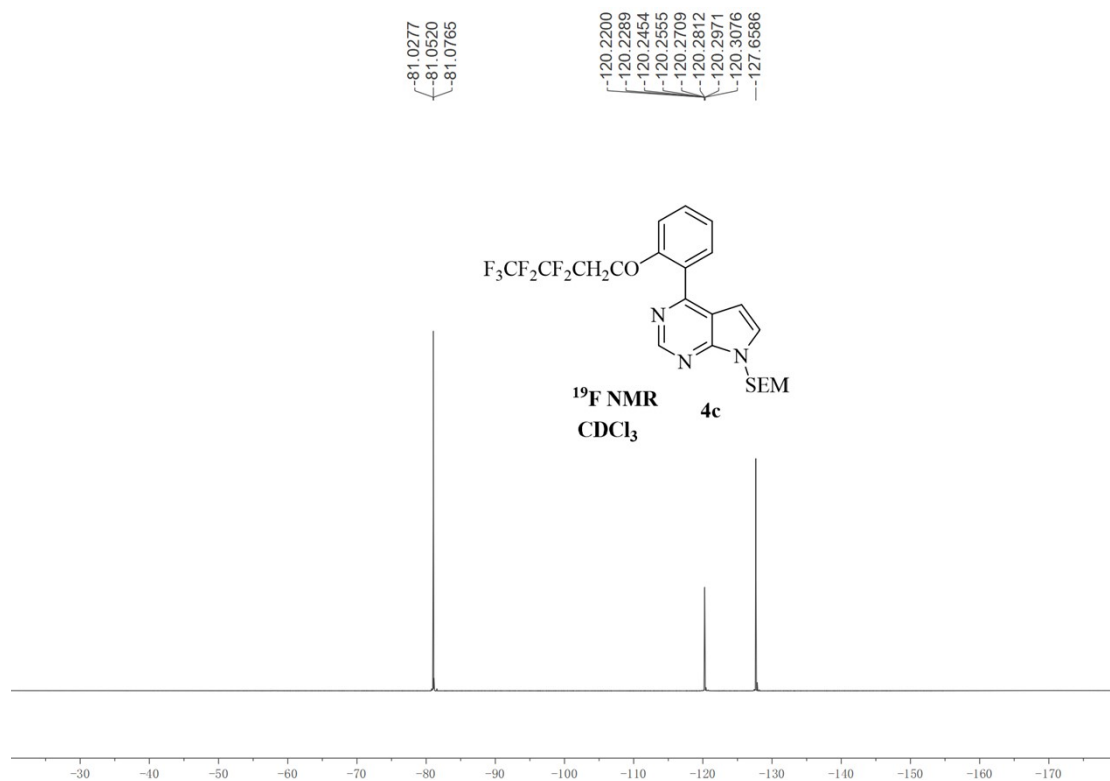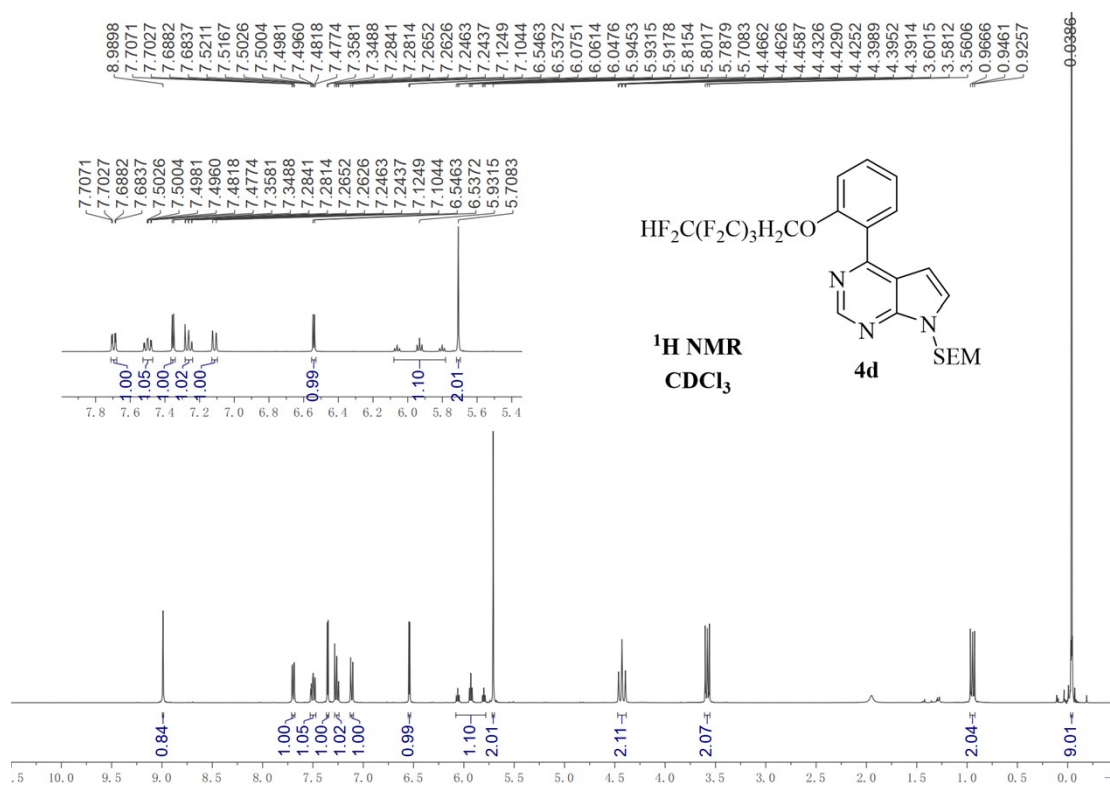

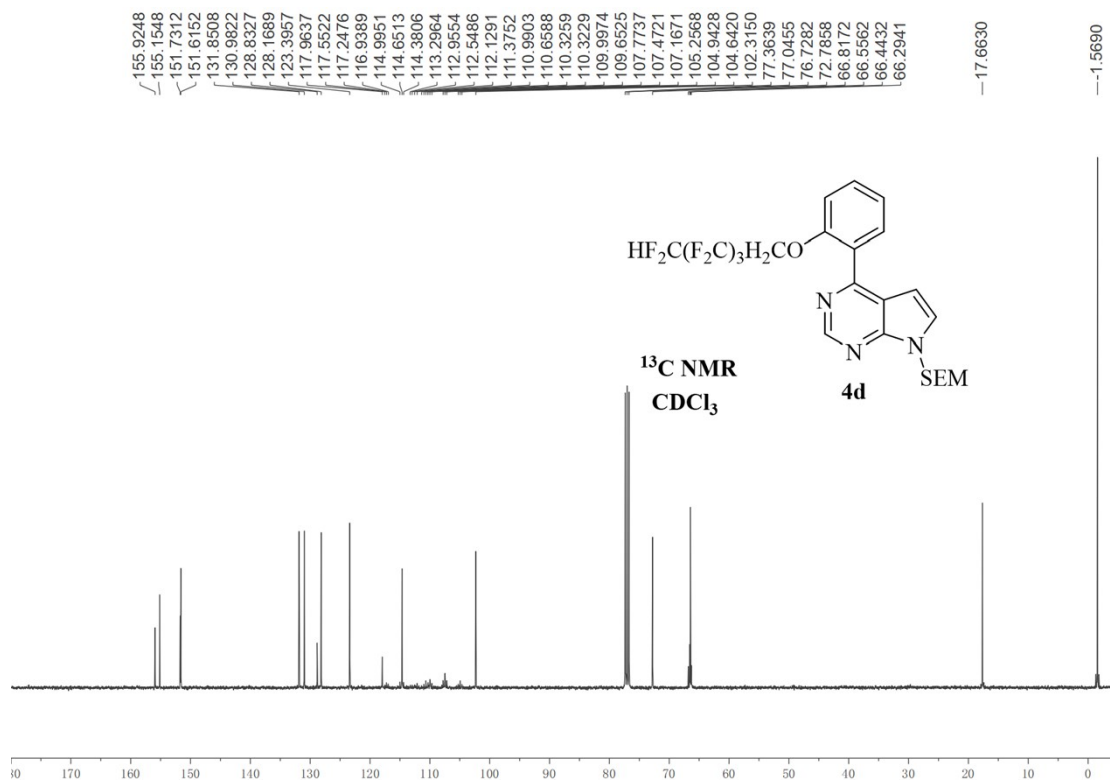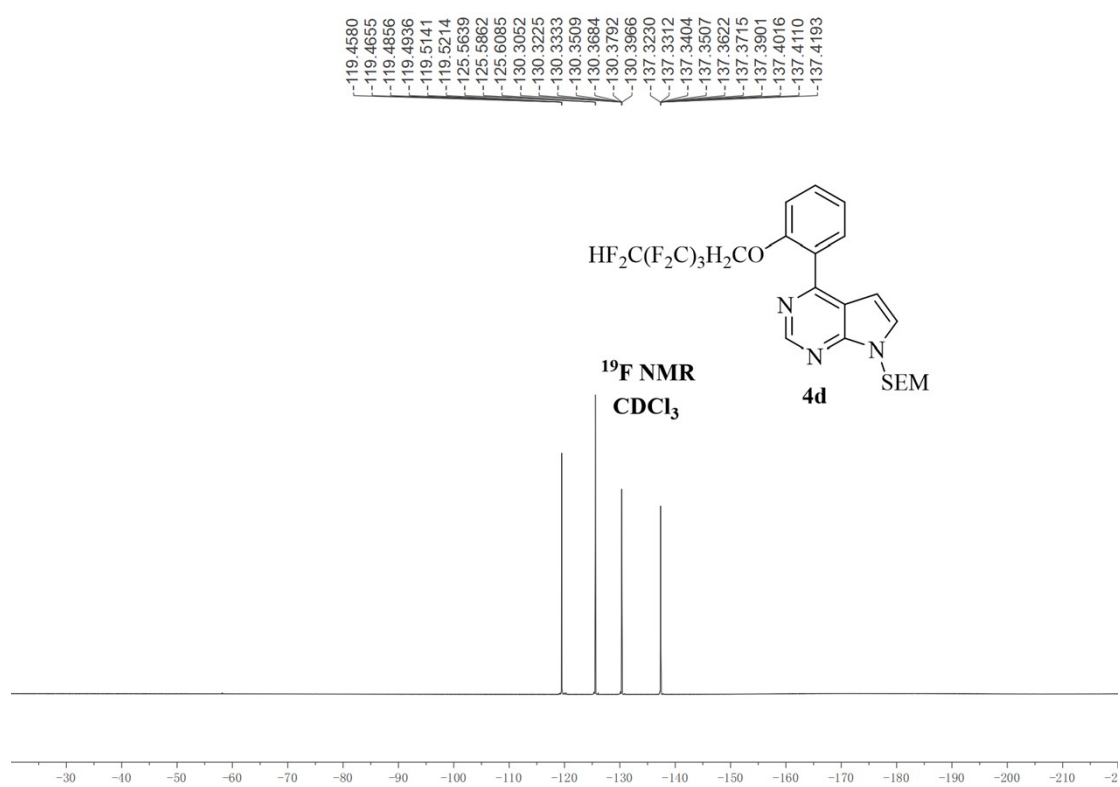

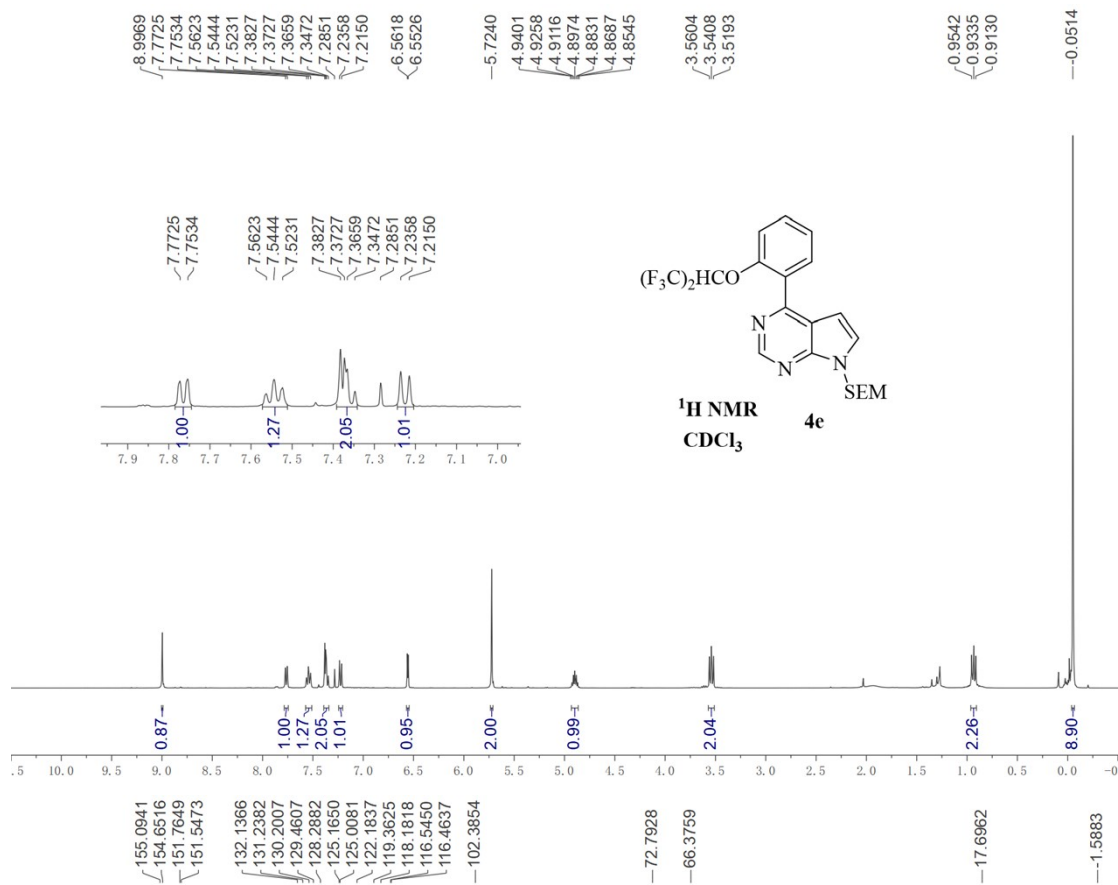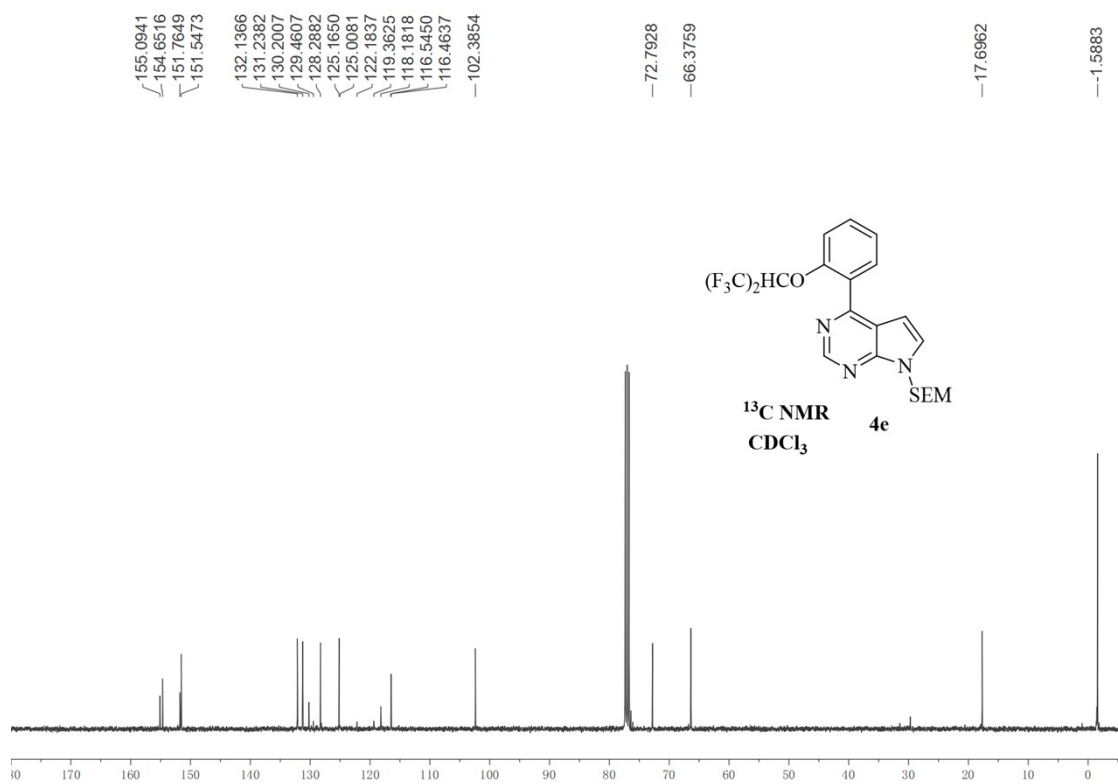

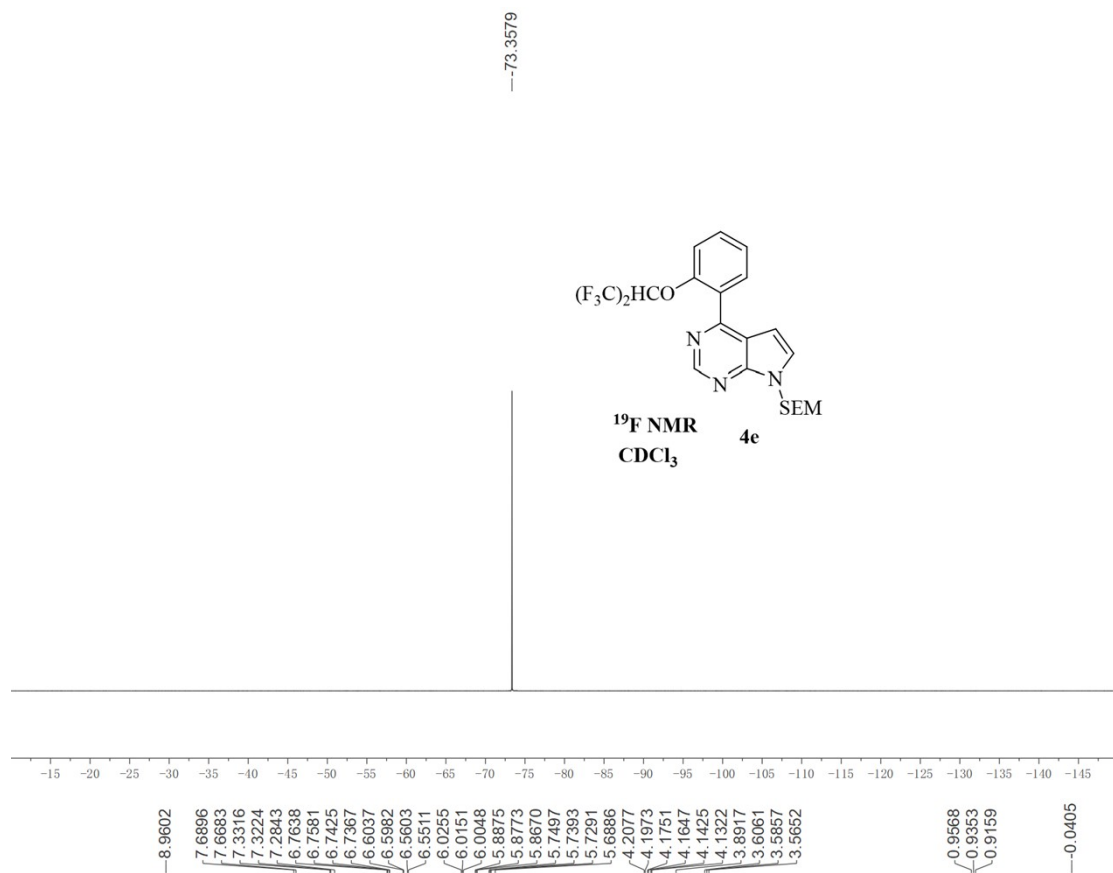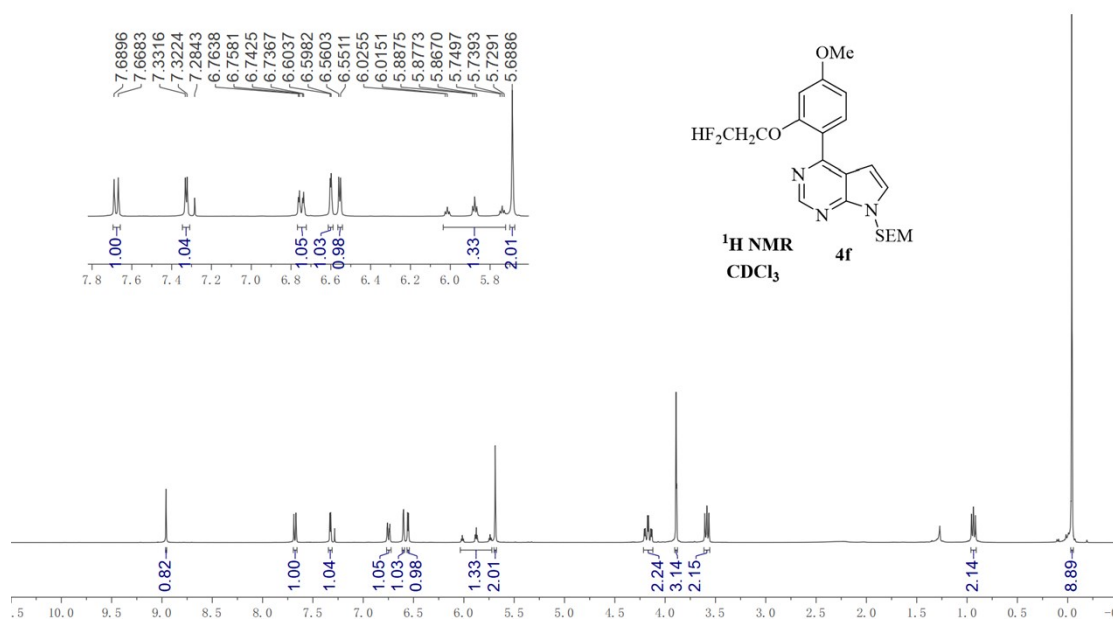

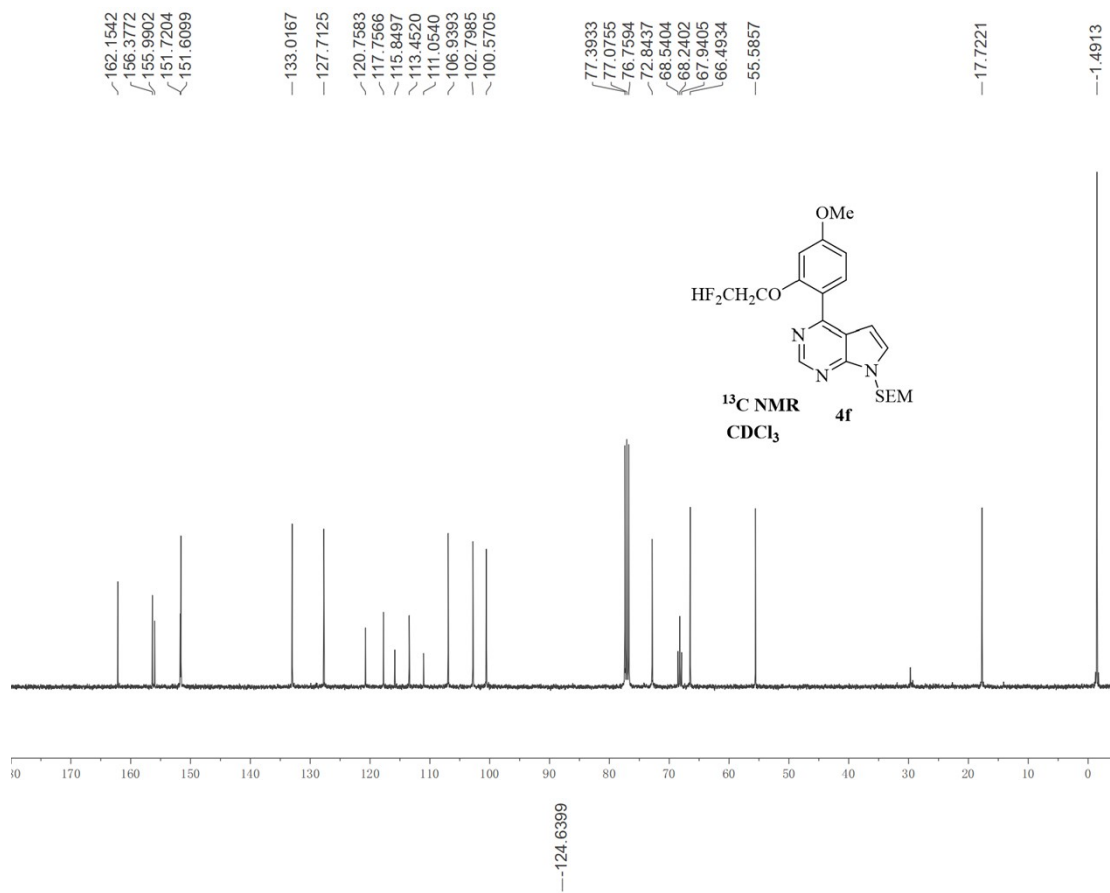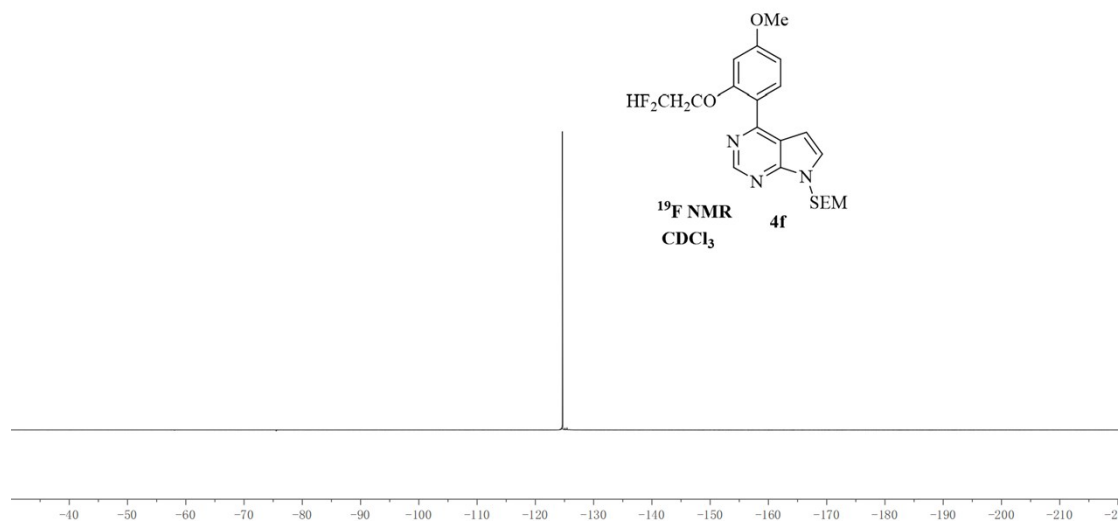

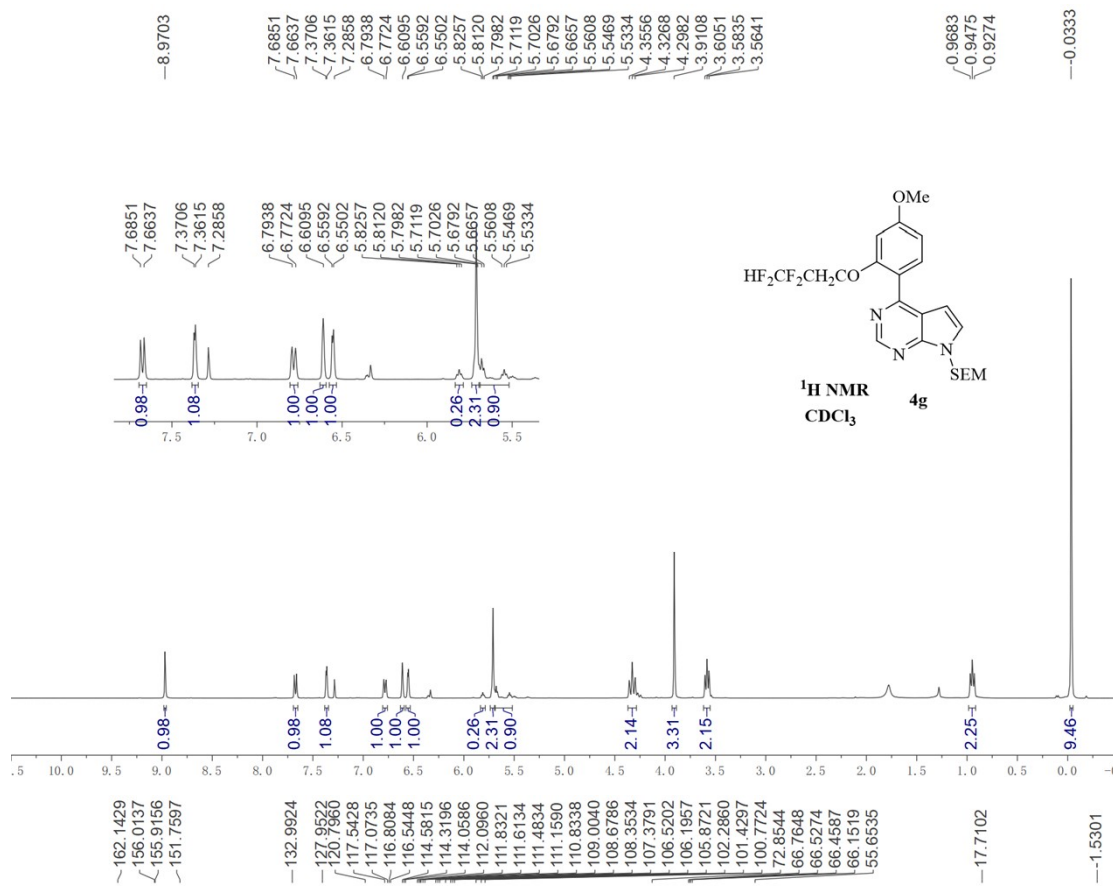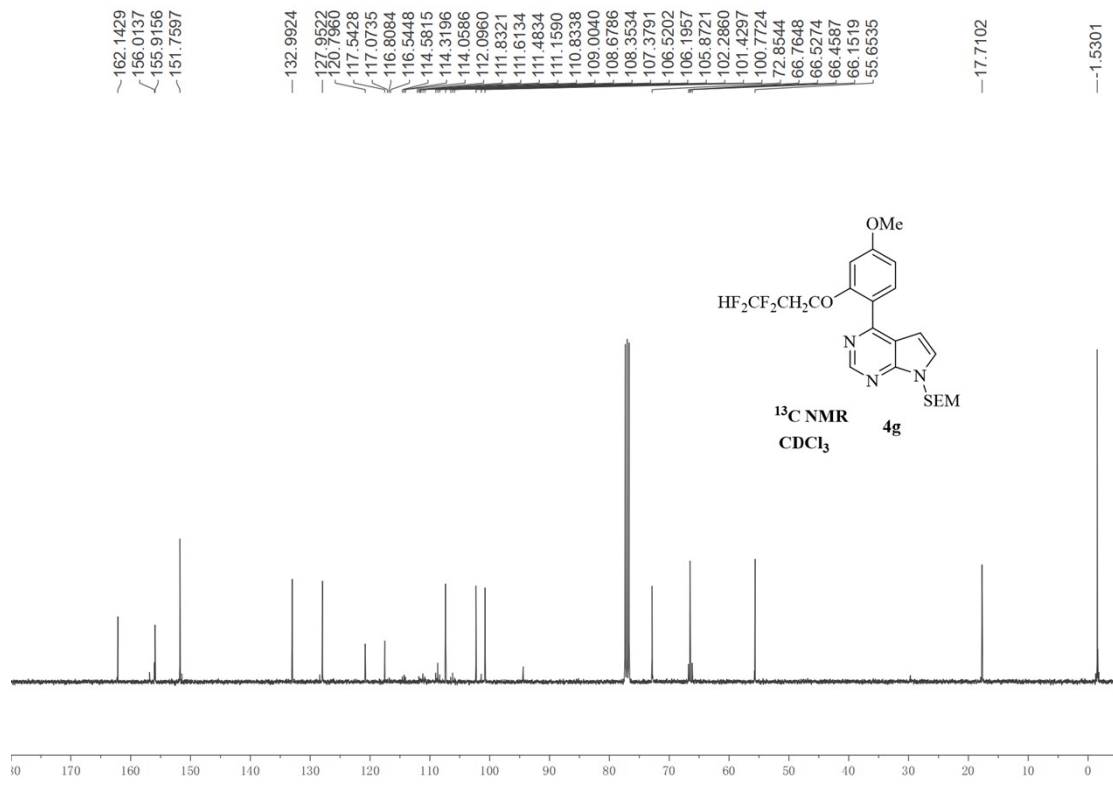

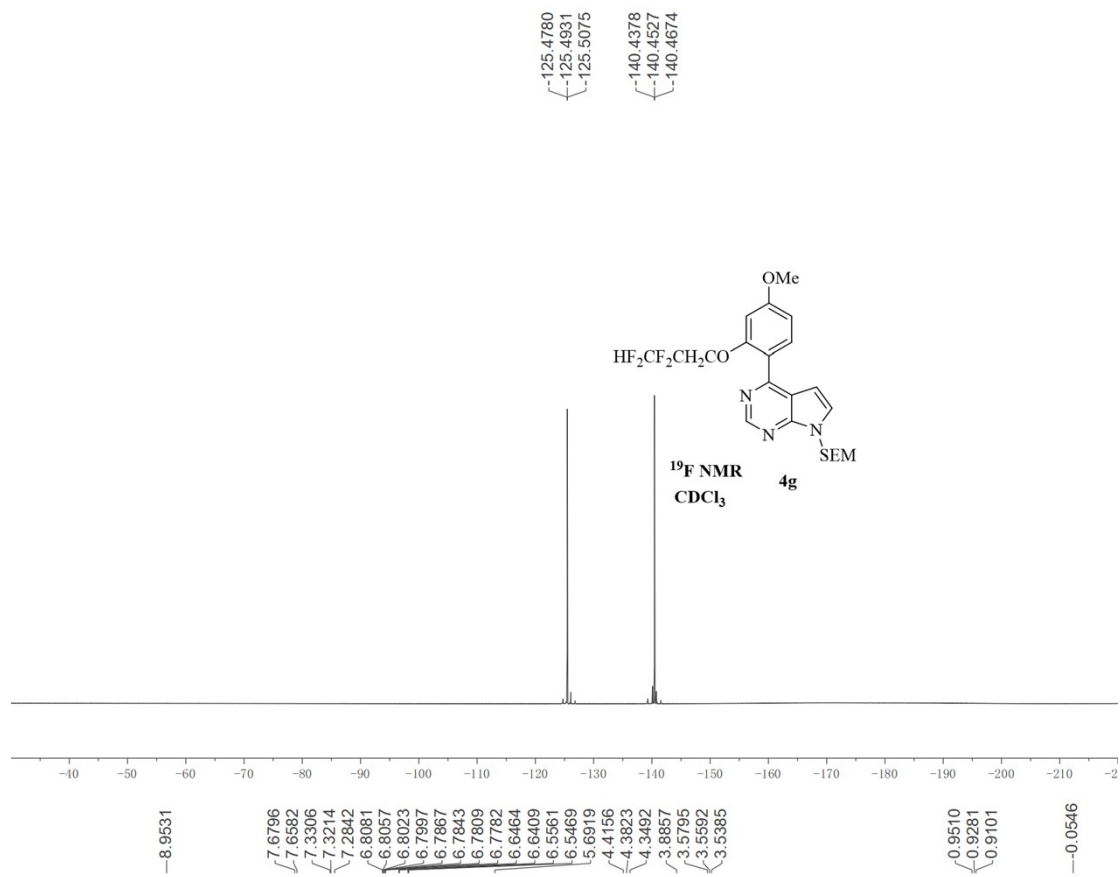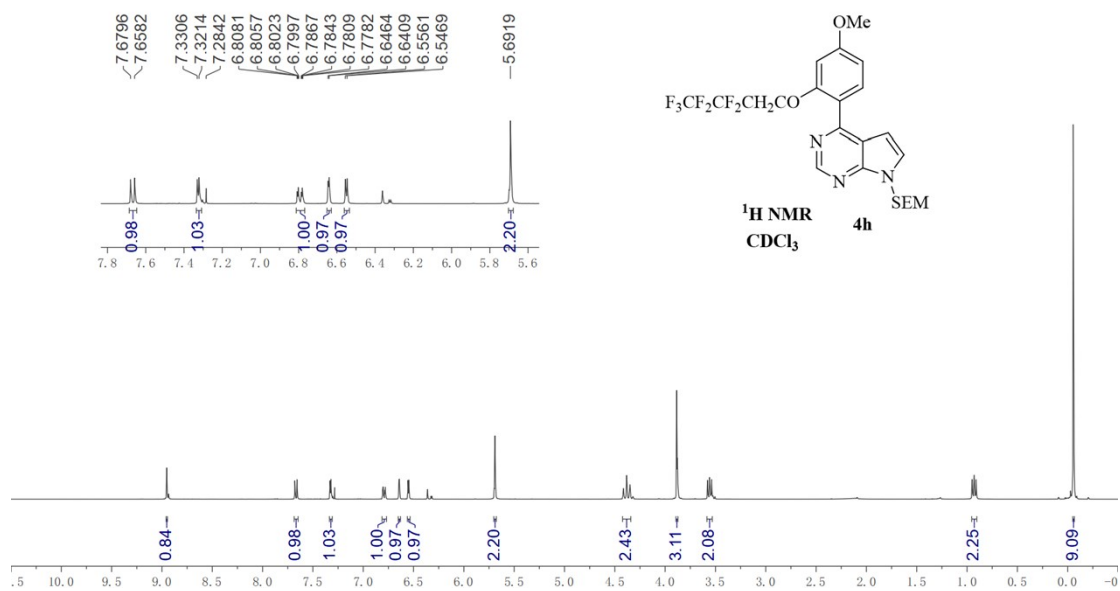



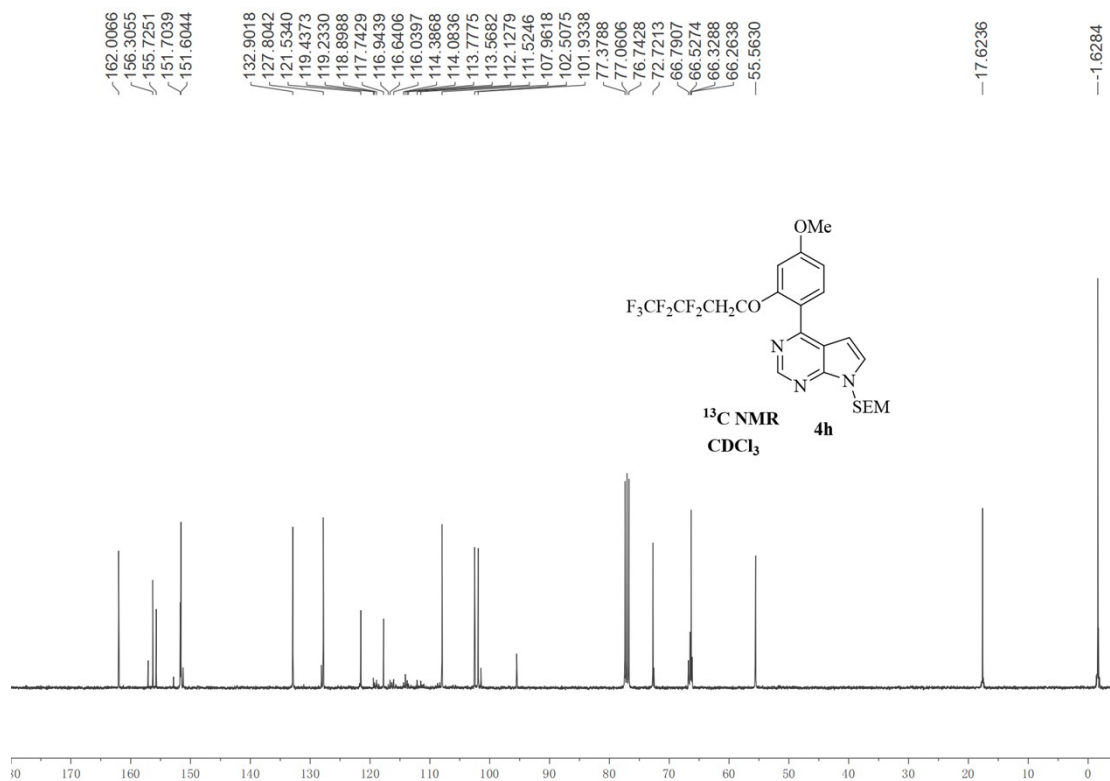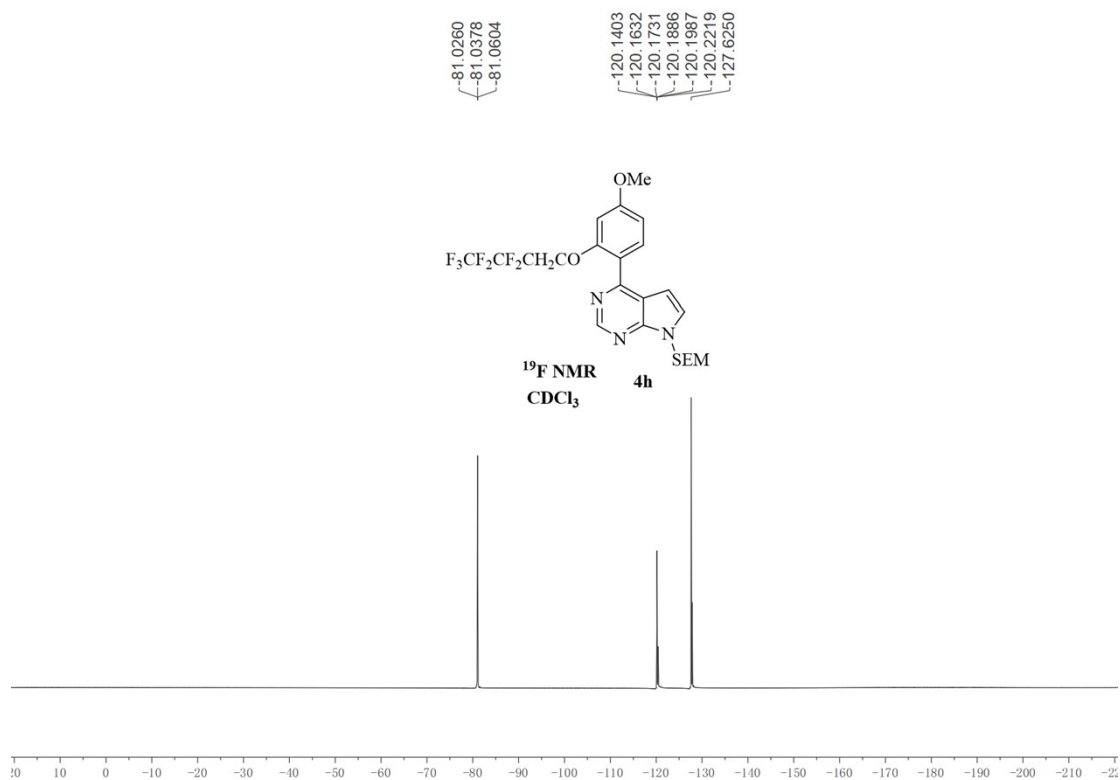

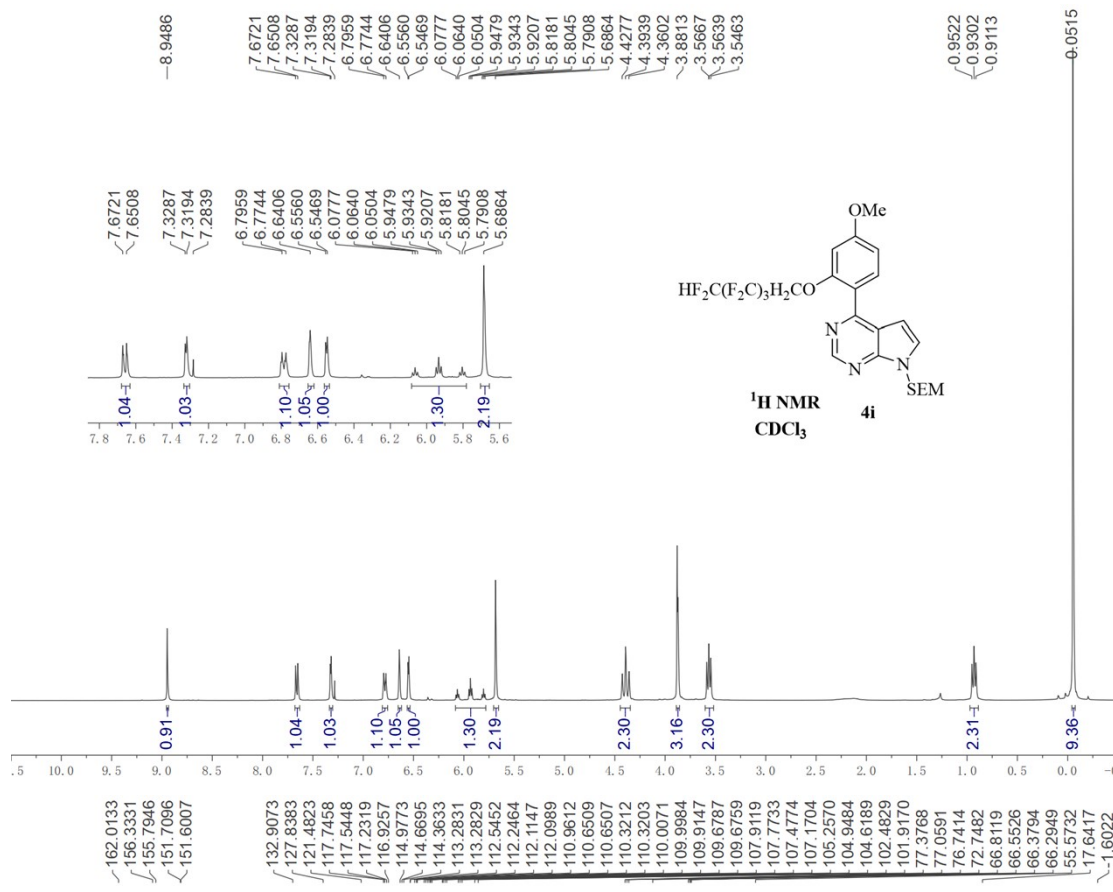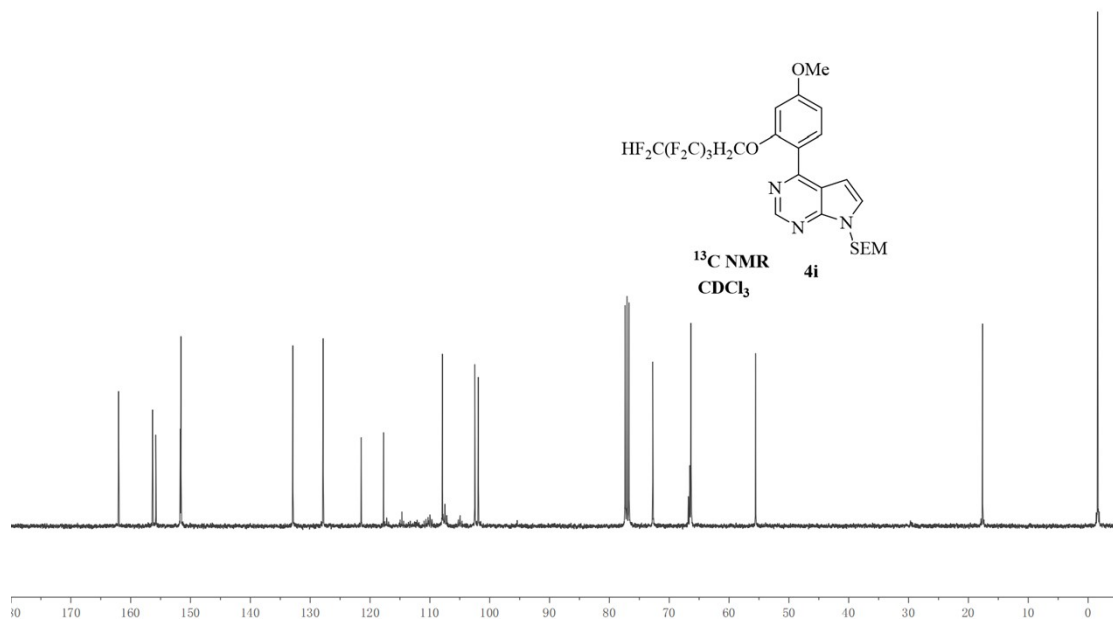

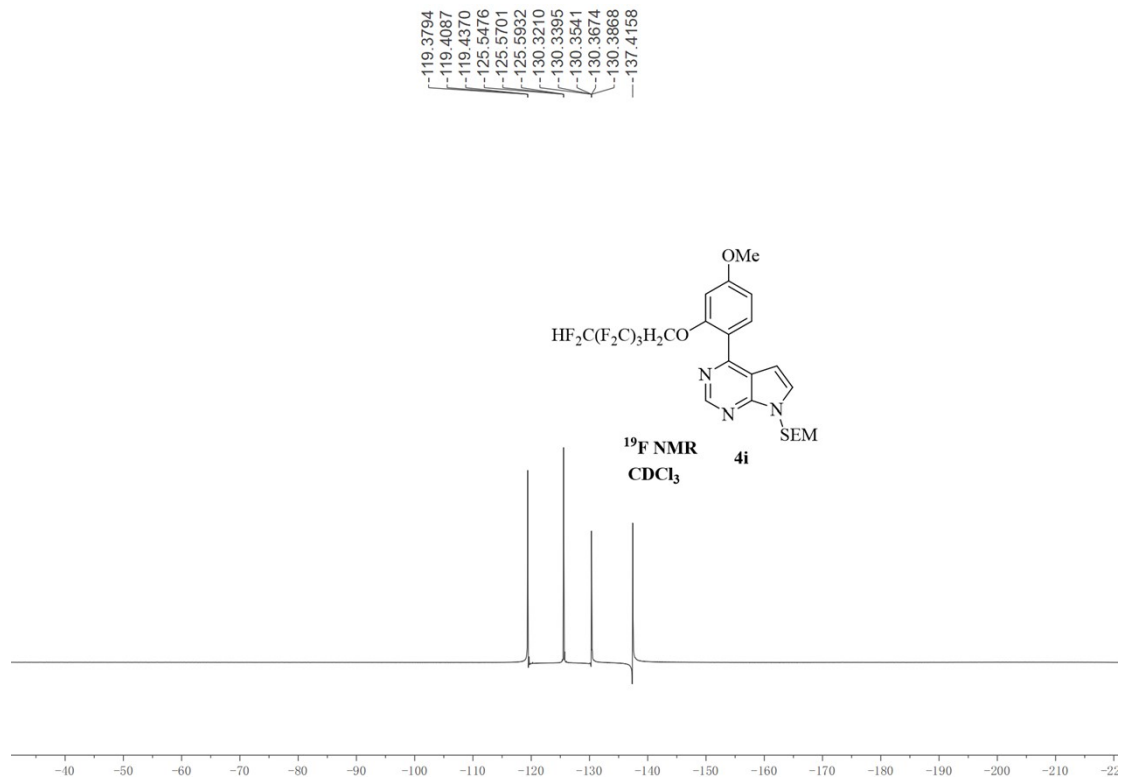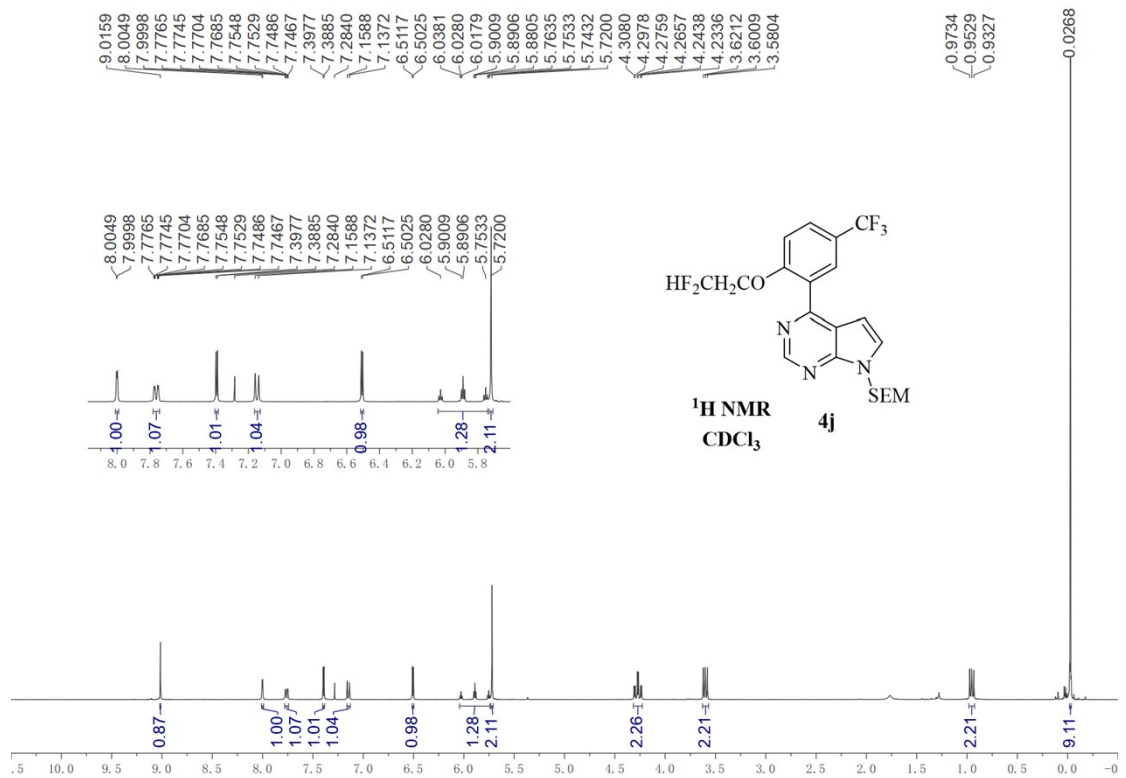

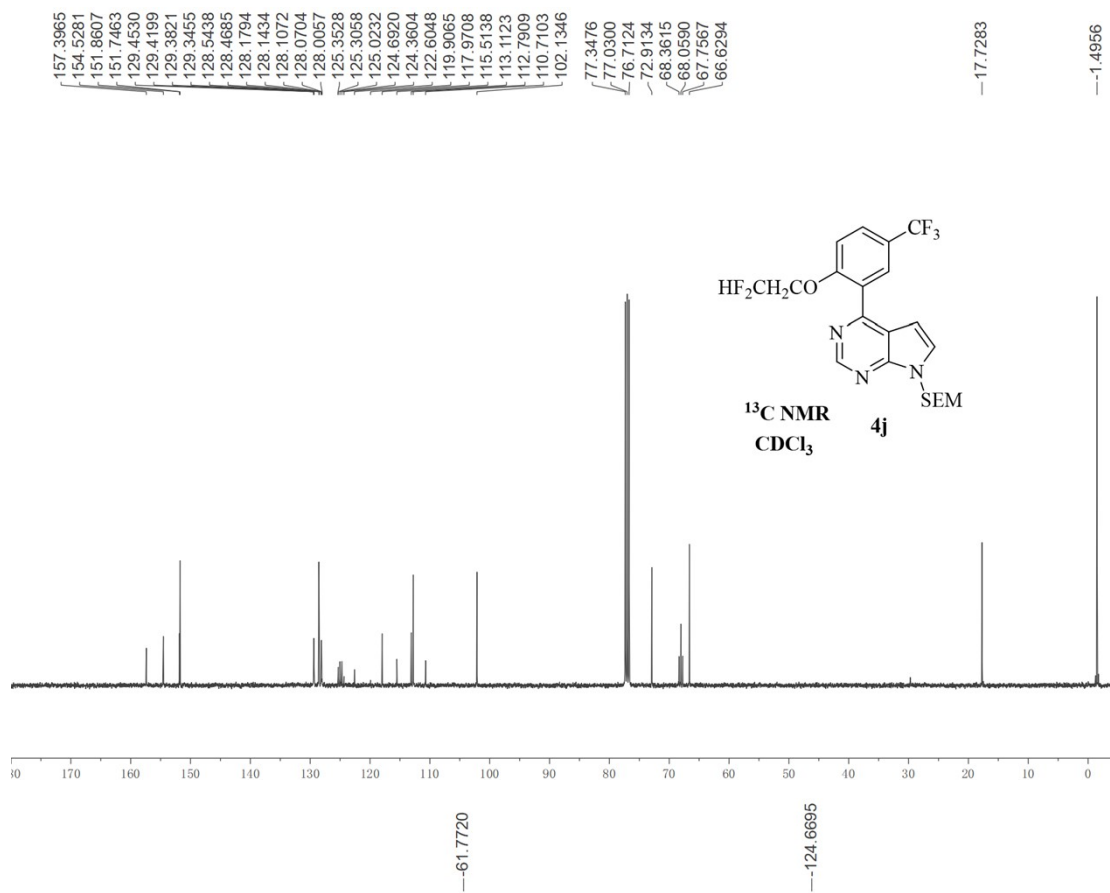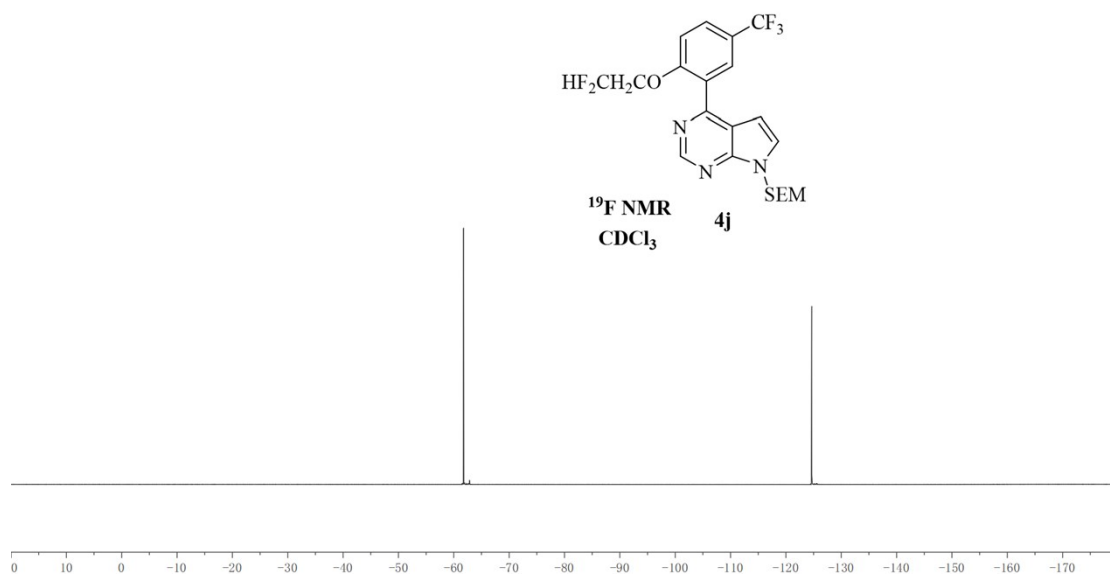

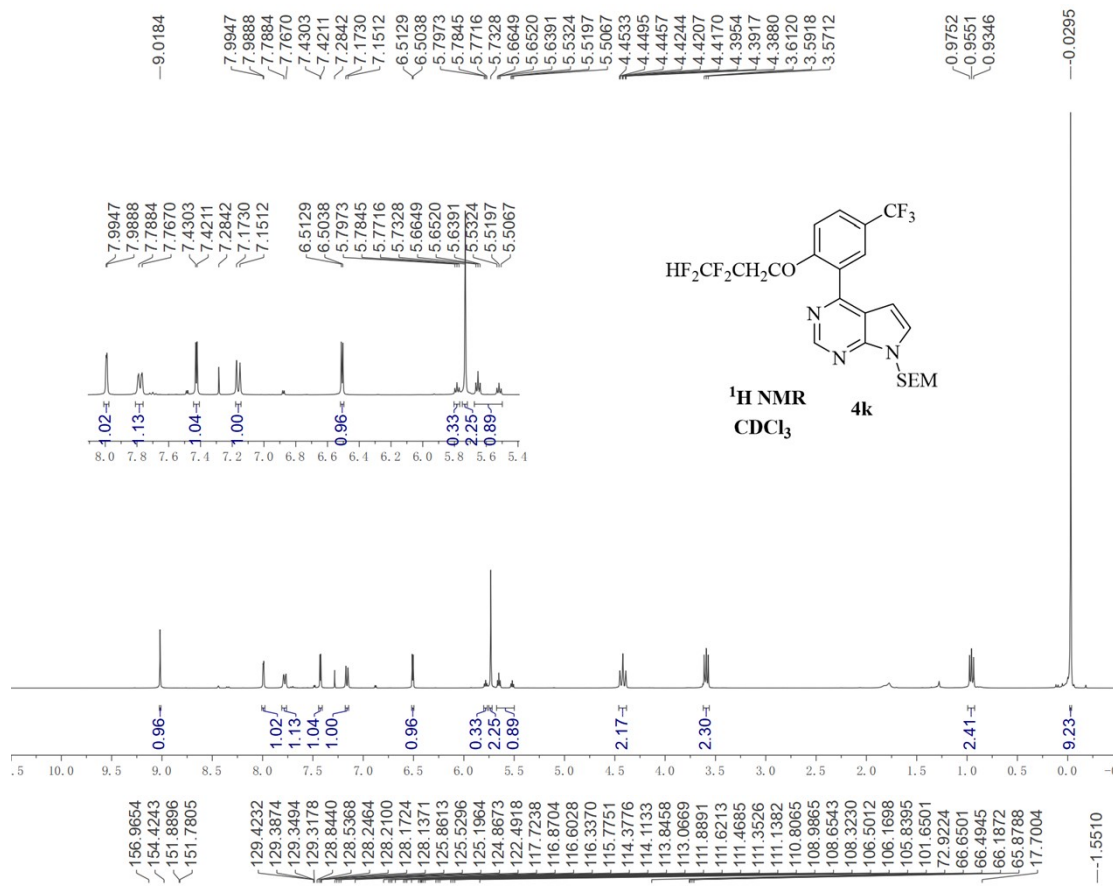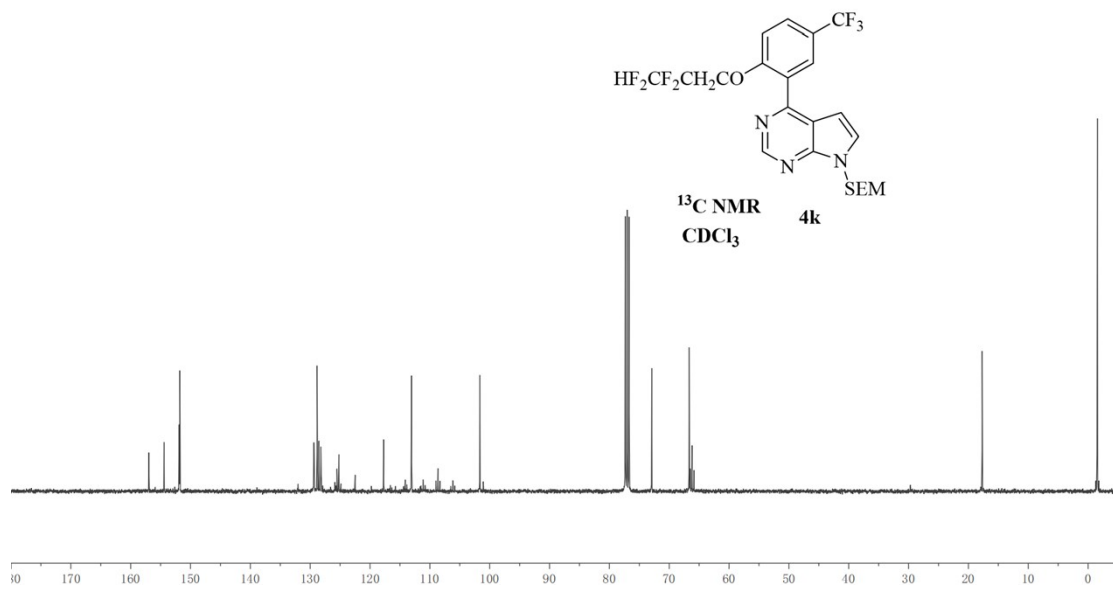

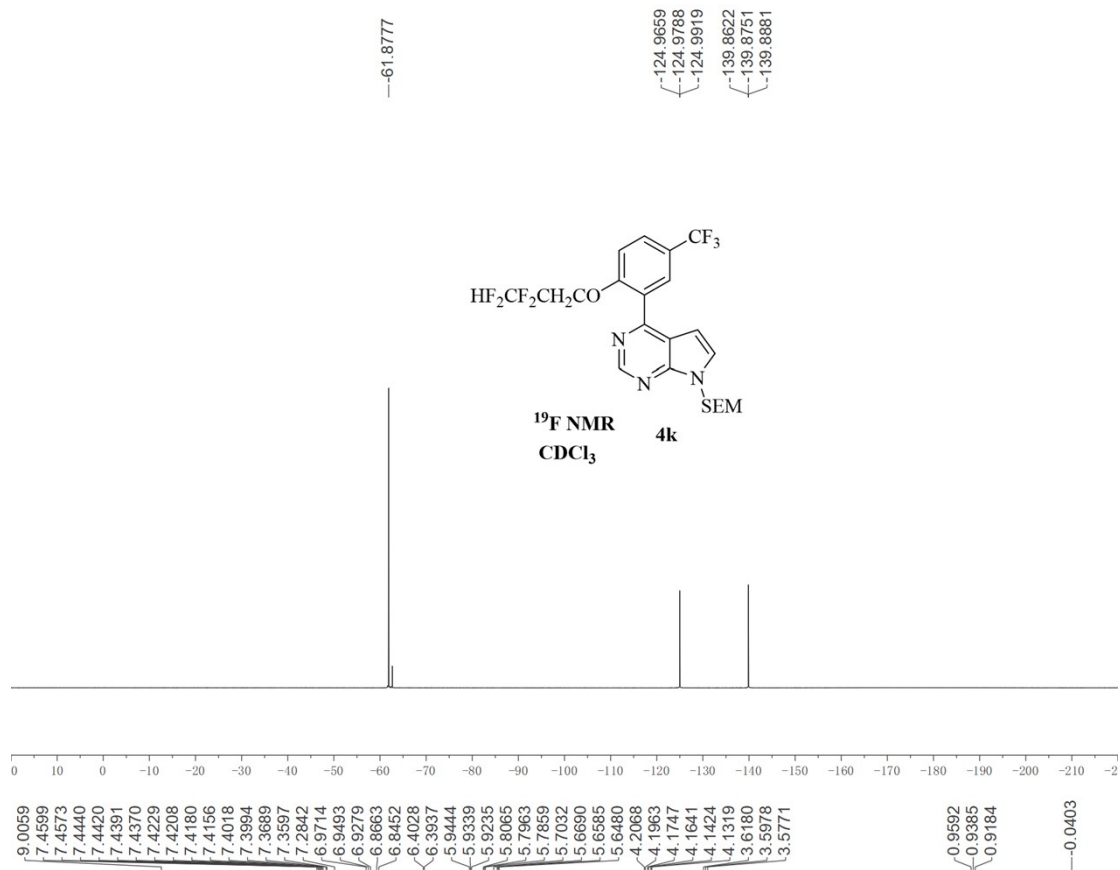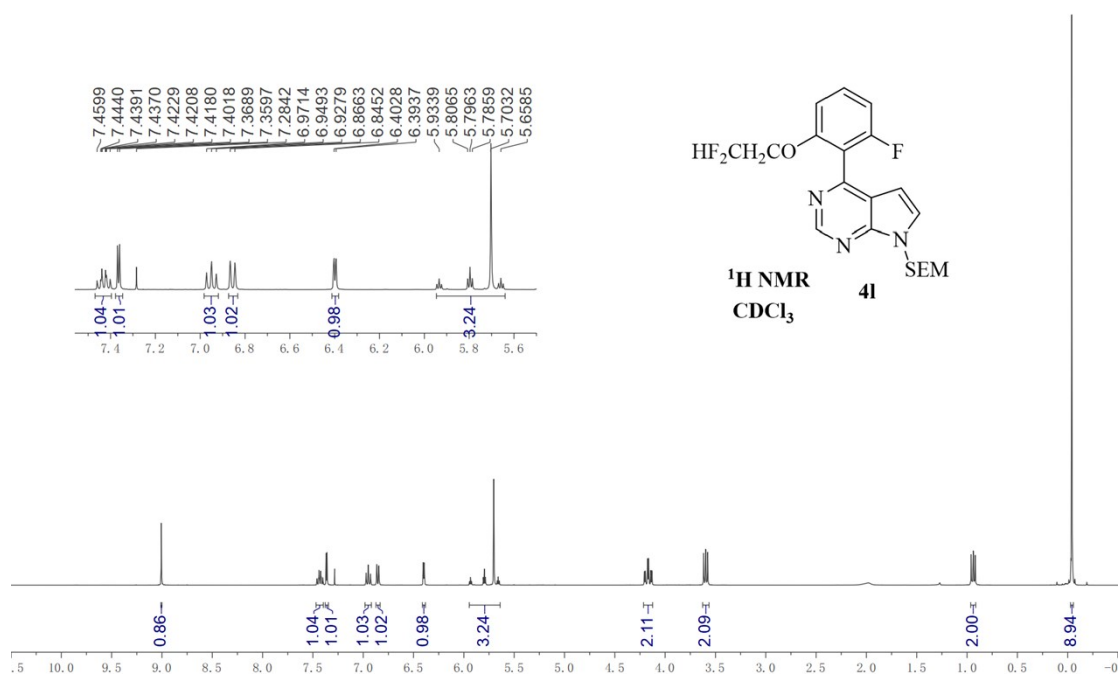

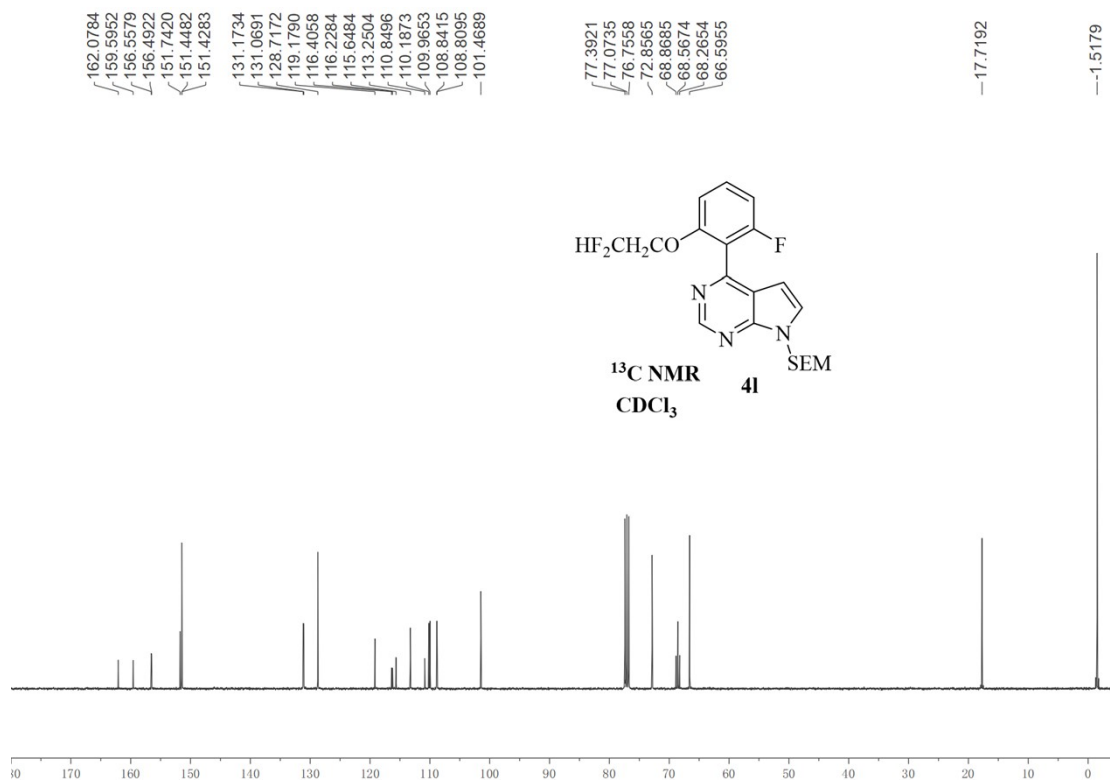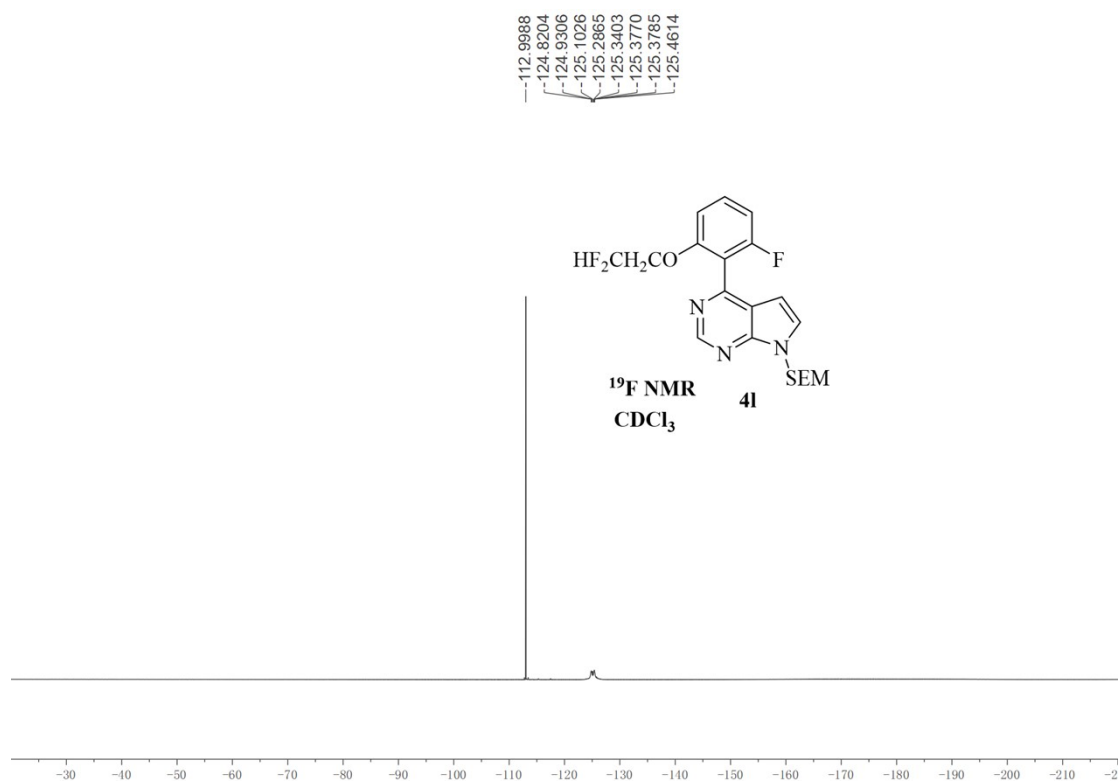

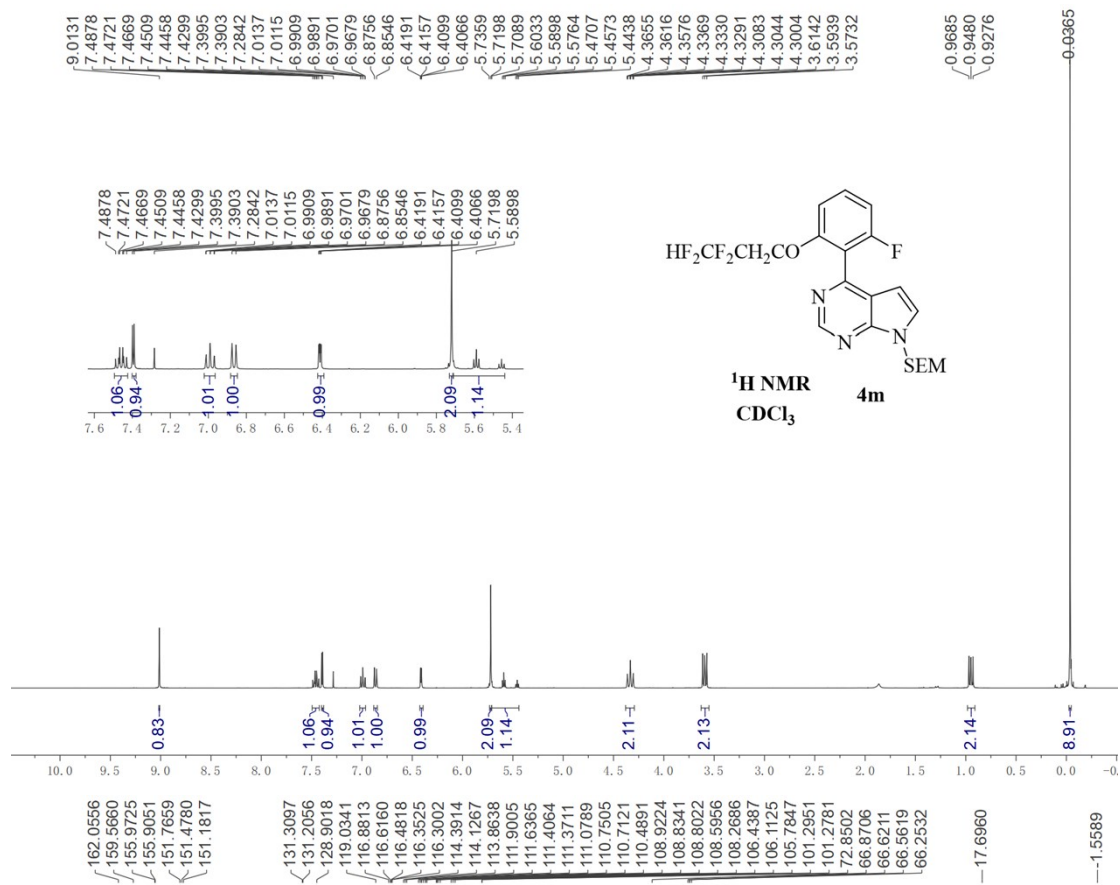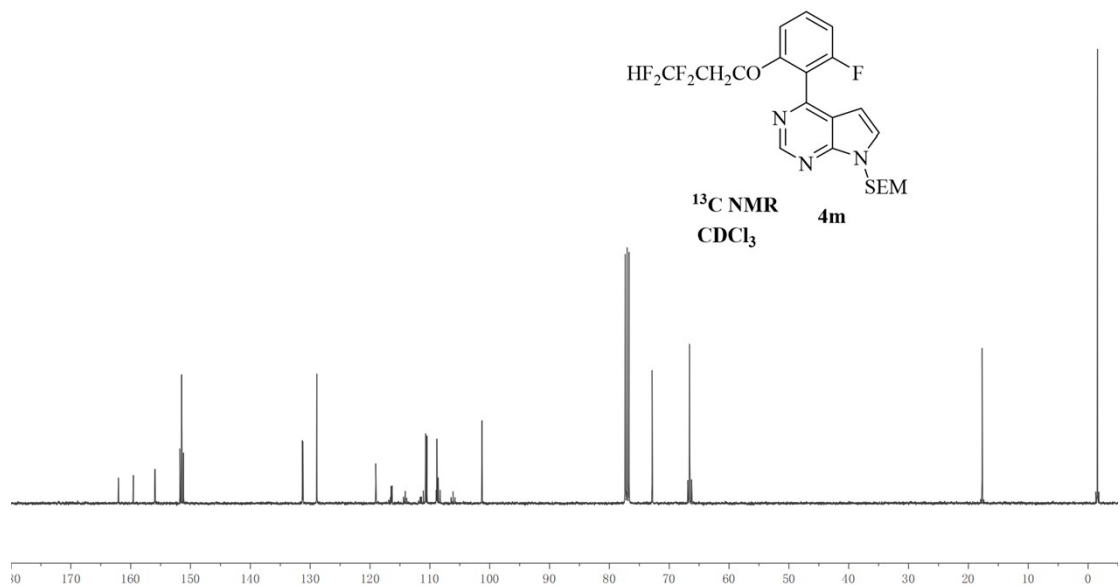



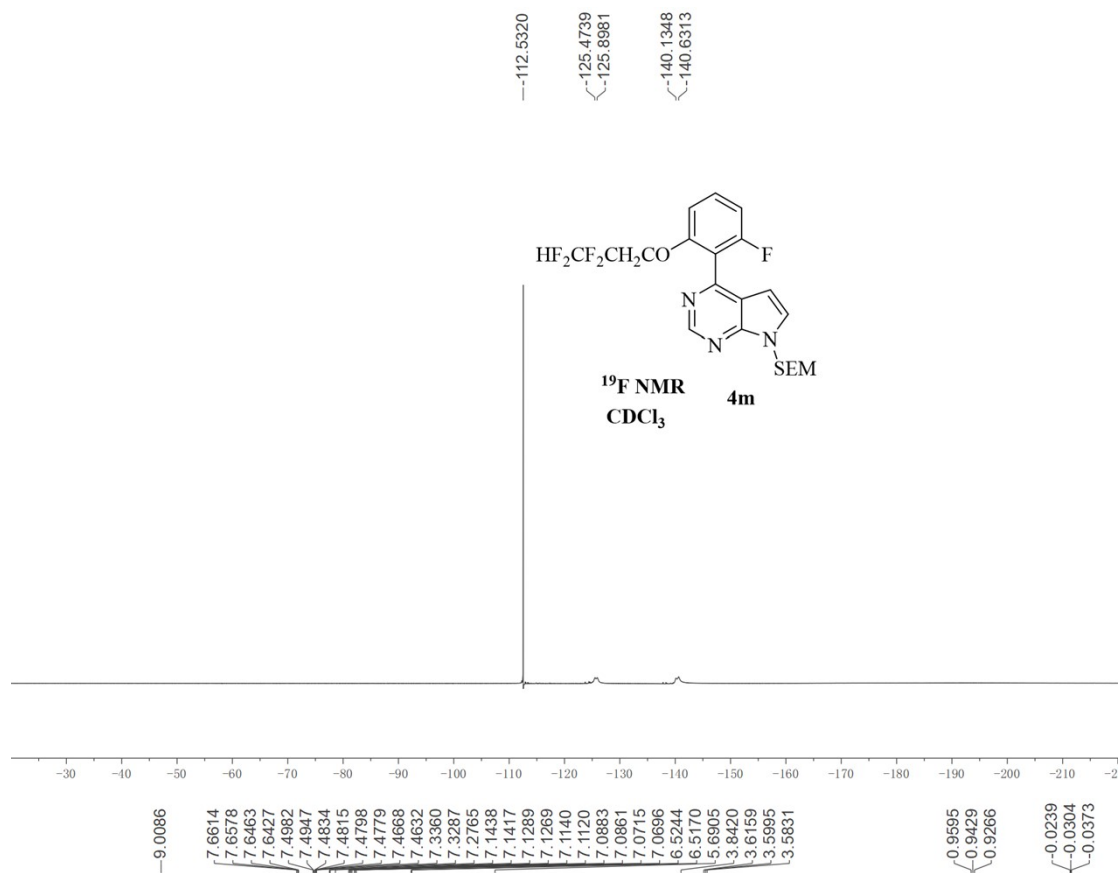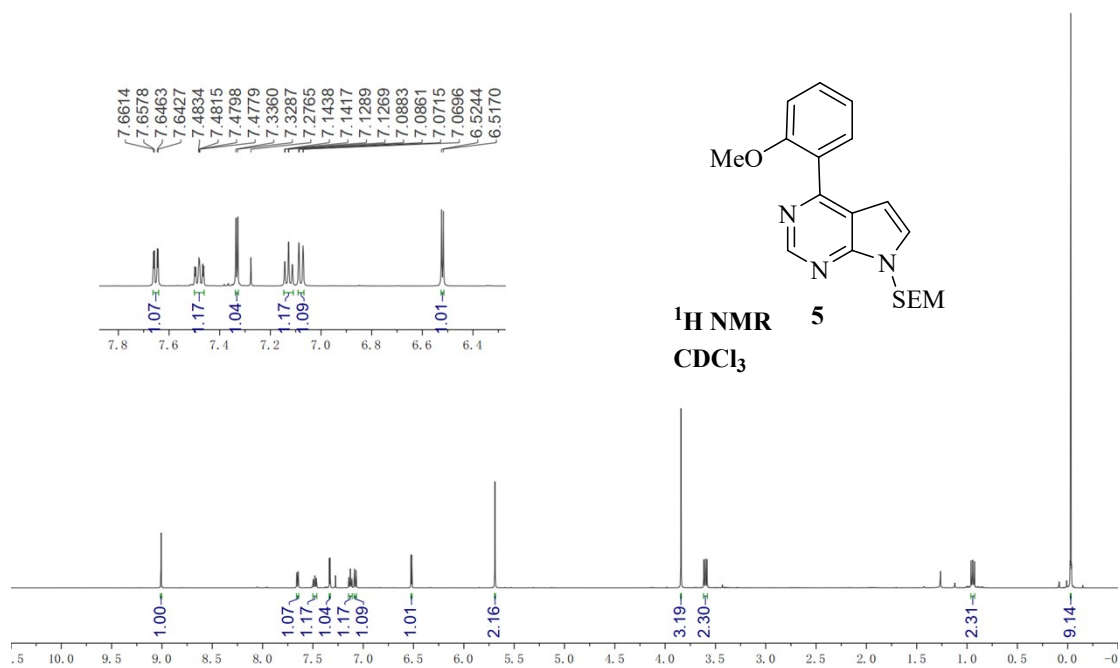

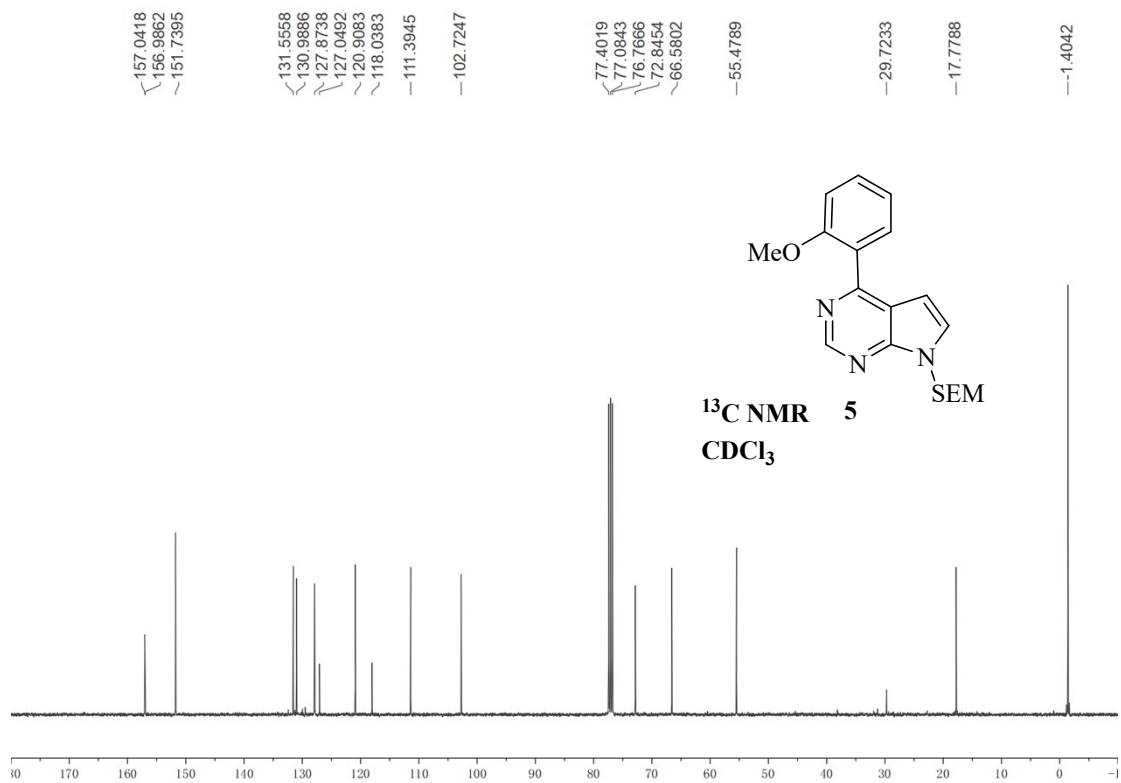

Supplement: d3ob00084b1.pdf [file d3ob00084b1.pdf]
